# Supplementary material for: Radical cyclization of alkynyl aryl ketones for the synthesis of 3-seleno-substituted thiochromones and chromones
Source: Royal Society of Chemistry journal article supplement (doi:10.1039/d2ob01762h), 2022-01-01
Supplement: d2ob01762h1.pdf [file d2ob01762h1.pdf]

## SUPPORTING INFORMATION

### Radical Cyclization of Alkynyl Aryl Ketones for the Synthesis of 3-Seleno-substituted Thiochromones and Chromones

Ricardo H. Bartz,<sup>a</sup> Krigor B. Silva,<sup>a</sup> Thiago J. Peglow,<sup>a</sup> Angelita M. Barcellos,<sup>a</sup>  
Raquel G. Jacob,<sup>a</sup> Eder J. Lenardão<sup>a</sup> and Gelson Perin<sup>\*a</sup>

<sup>a</sup> Laboratório de Síntese Orgânica Limpa - LASOL, CCQFA, Universidade Federal de Pelotas -  
UFPel, P.O. Box 354 - 96010-900, Pelotas, RS, Brazil.

\* **Corresponding Author:** E-mail: gelson\_perin@ufpel.edu.br (G. Perin)

### Contents

|                                                                                     |    |
|-------------------------------------------------------------------------------------|----|
| Copies of ( <sup>1</sup> H, <sup>13</sup> C and <sup>77</sup> Se) NMR spectra ..... | S2 |
|-------------------------------------------------------------------------------------|----|

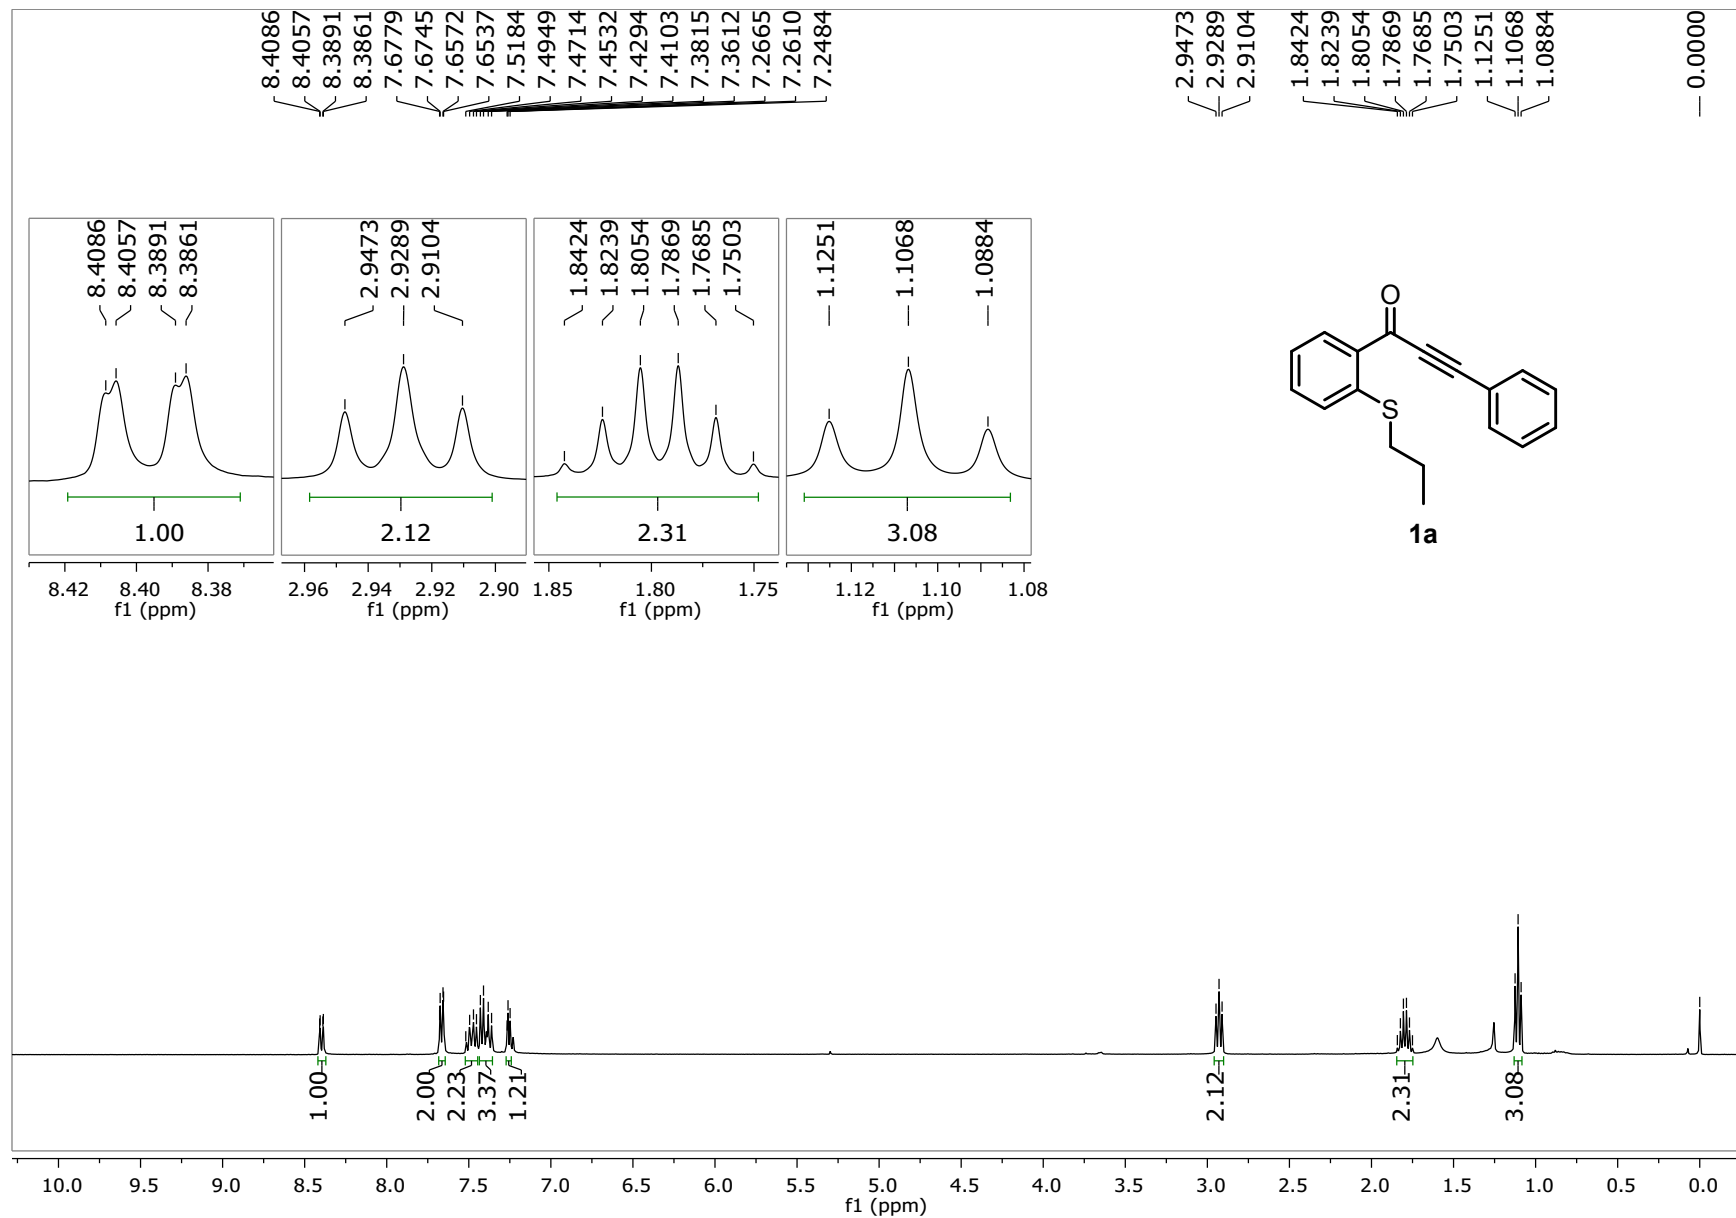

Figure S1:  $^1\text{H}$  NMR (400 MHz,  $\text{CDCl}_3$ ) spectrum of compound **1a**.

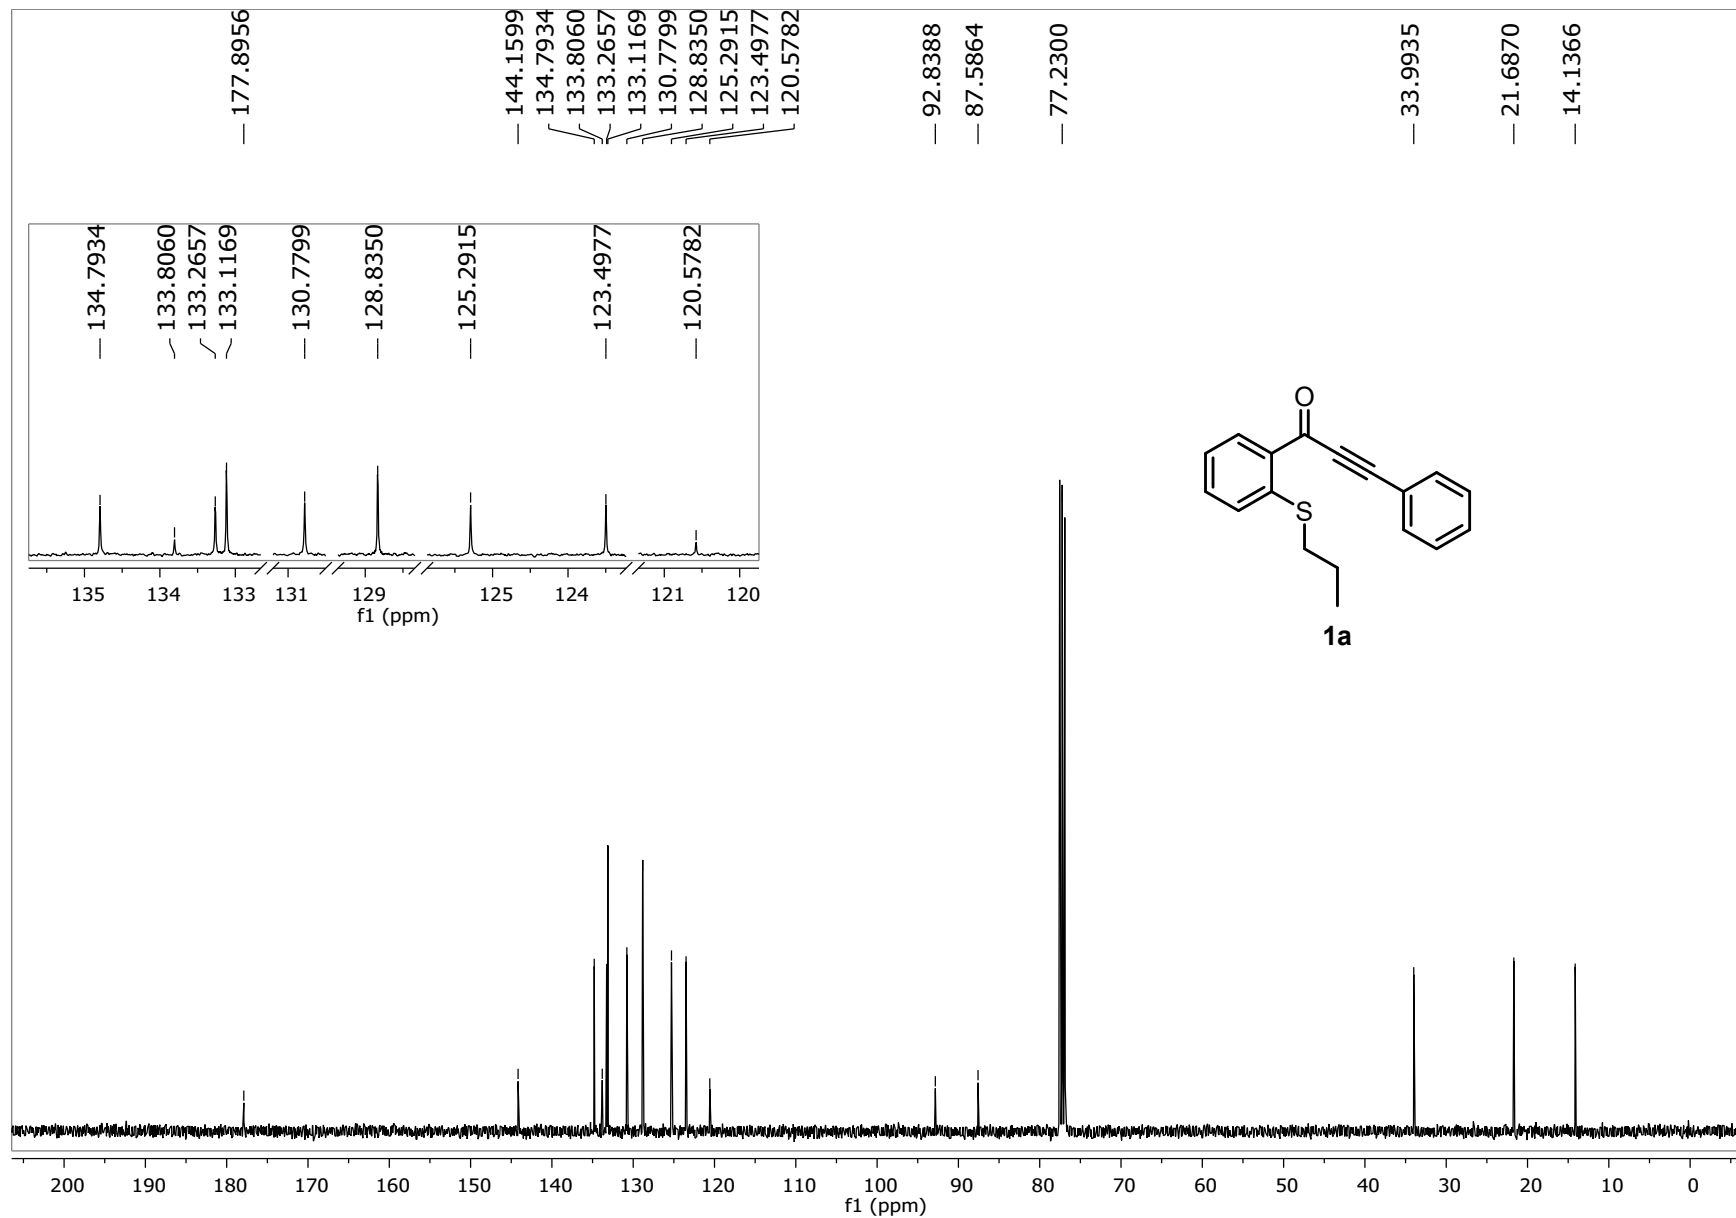

Figure S2:  $^{13}\text{C}\{^1\text{H}\}$  NMR (100 MHz,  $\text{CDCl}_3$ ) spectrum of compound **1a**.

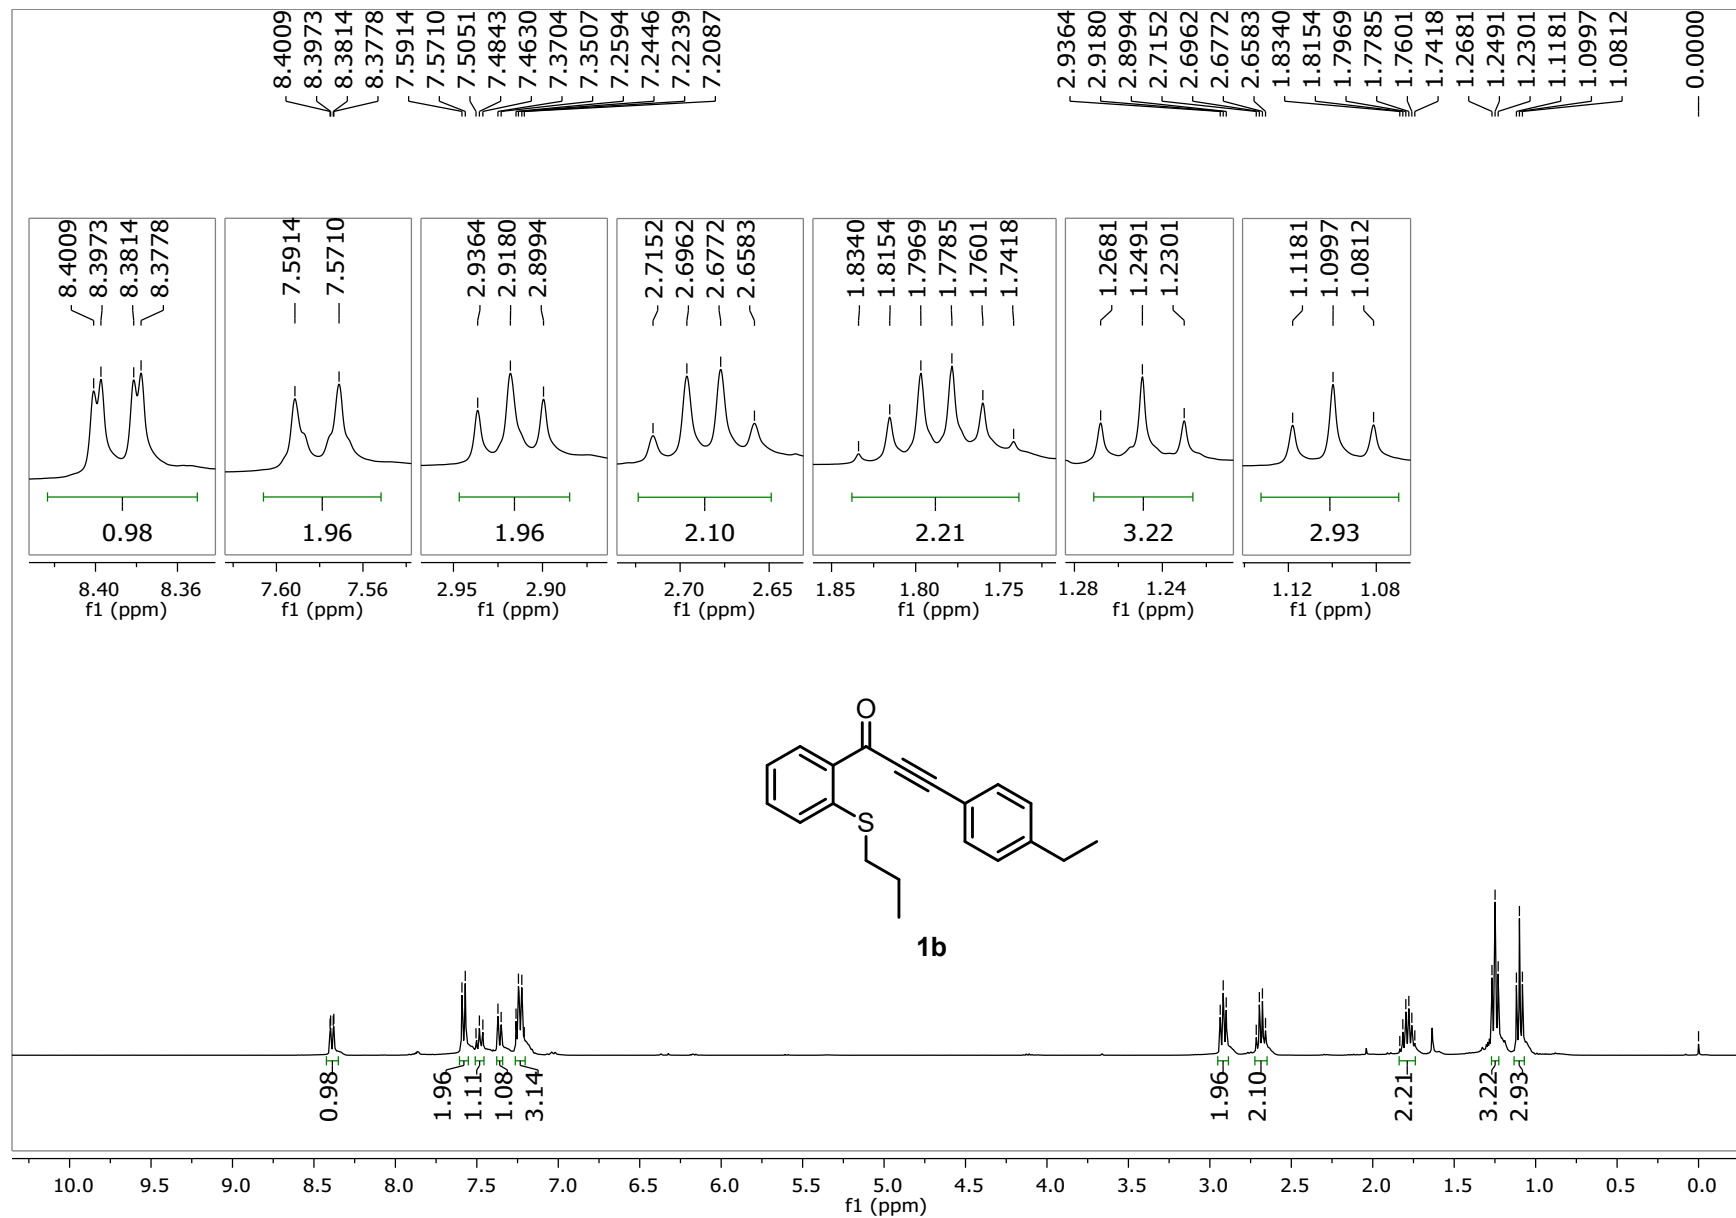

Figure S3:  $^1\text{H}$  NMR (400 MHz,  $\text{CDCl}_3$ ) spectrum of compound **1b**.

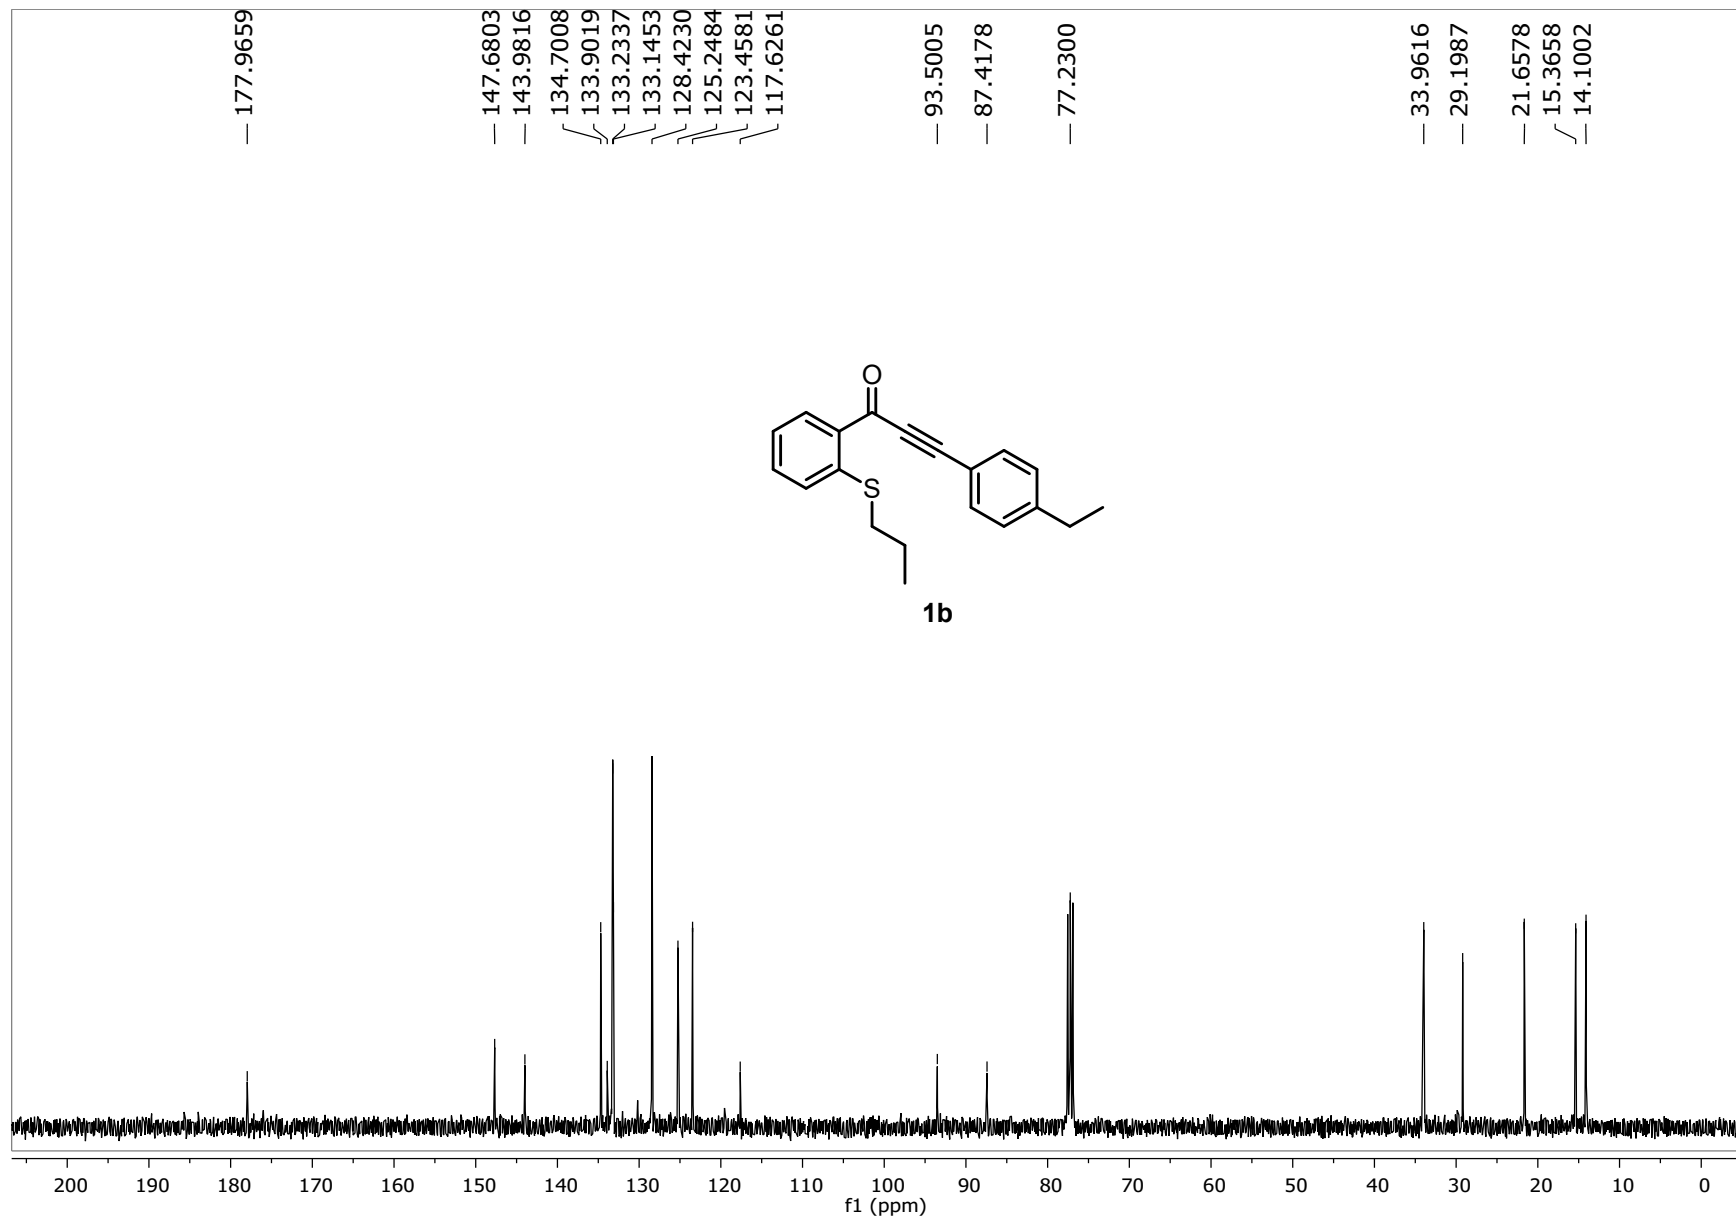

Figure S4:  $^{13}\text{C}\{^1\text{H}\}$  NMR (100 MHz,  $\text{CDCl}_3$ ) spectrum of compound **1b**.

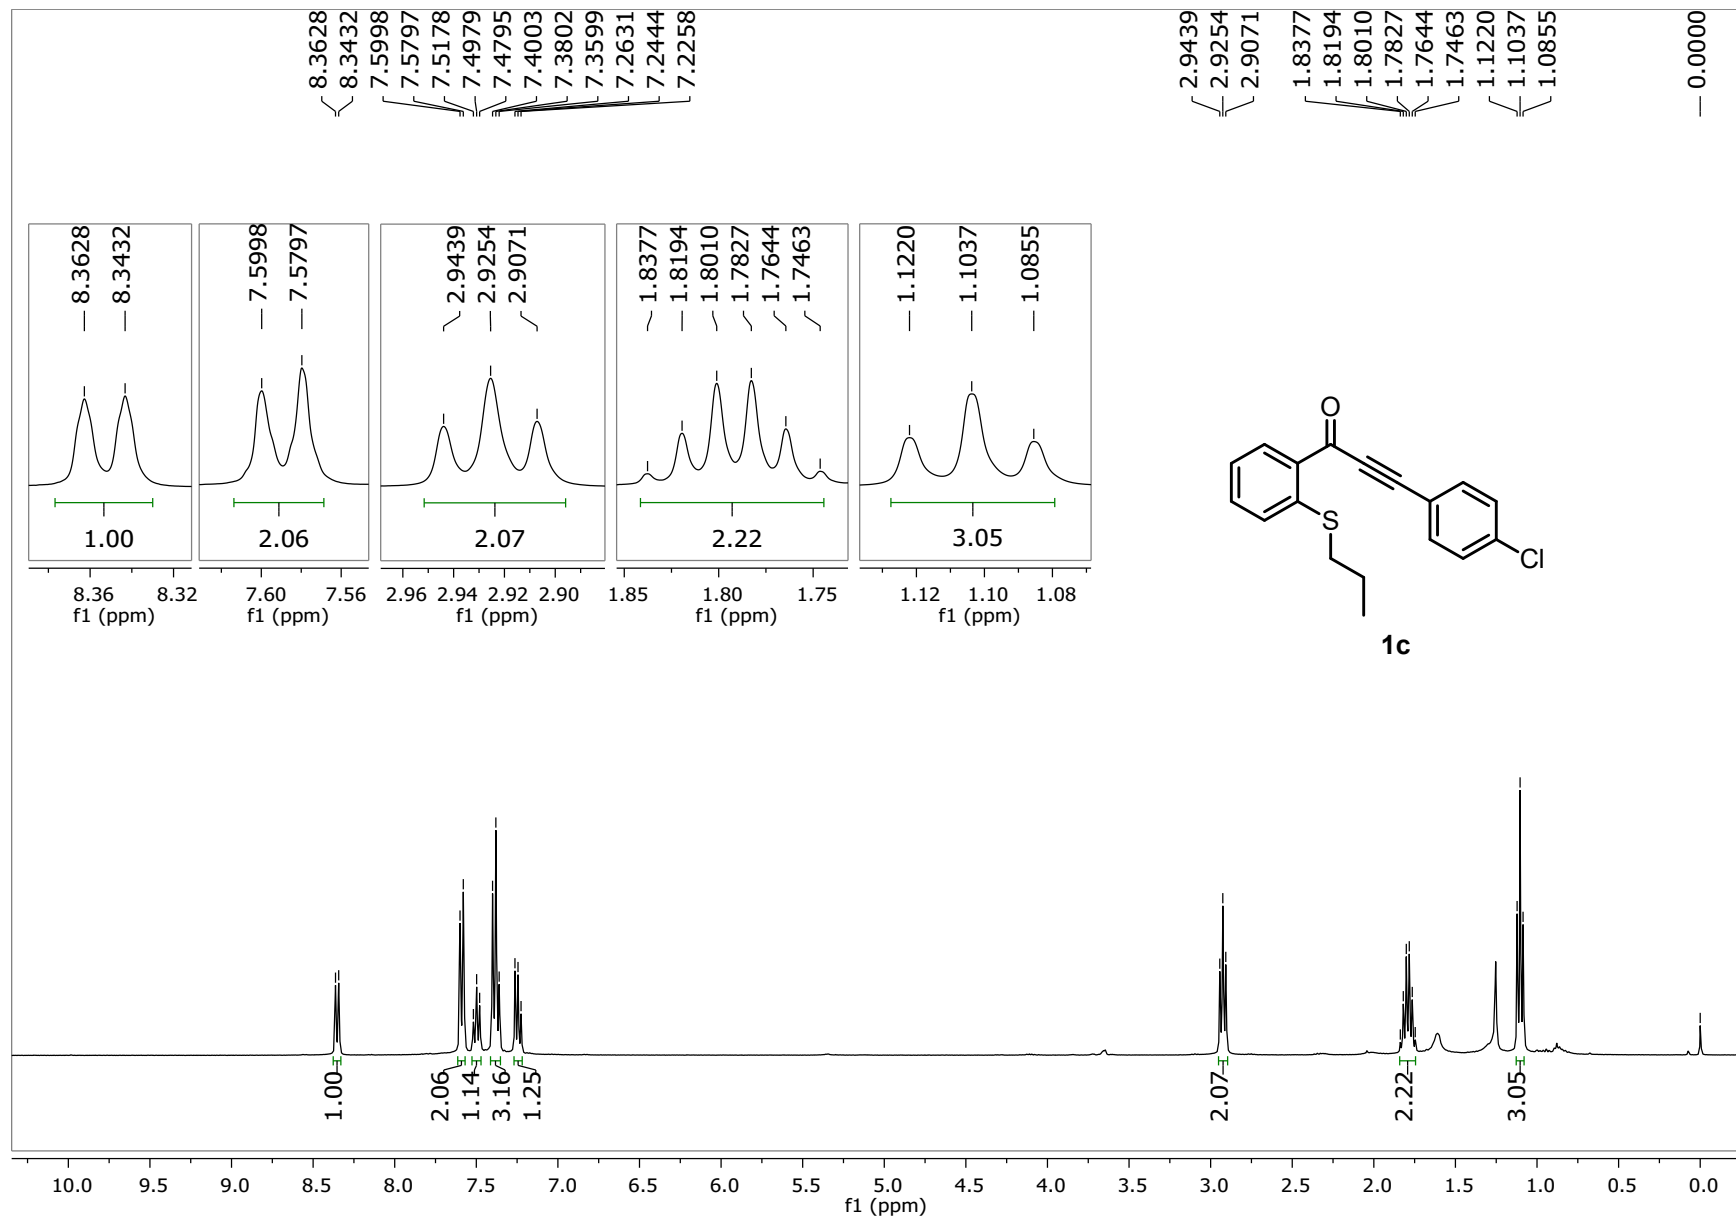

Figure S5: <sup>1</sup>H NMR (400 MHz, CDCl<sub>3</sub>) spectrum of compound **1c**.

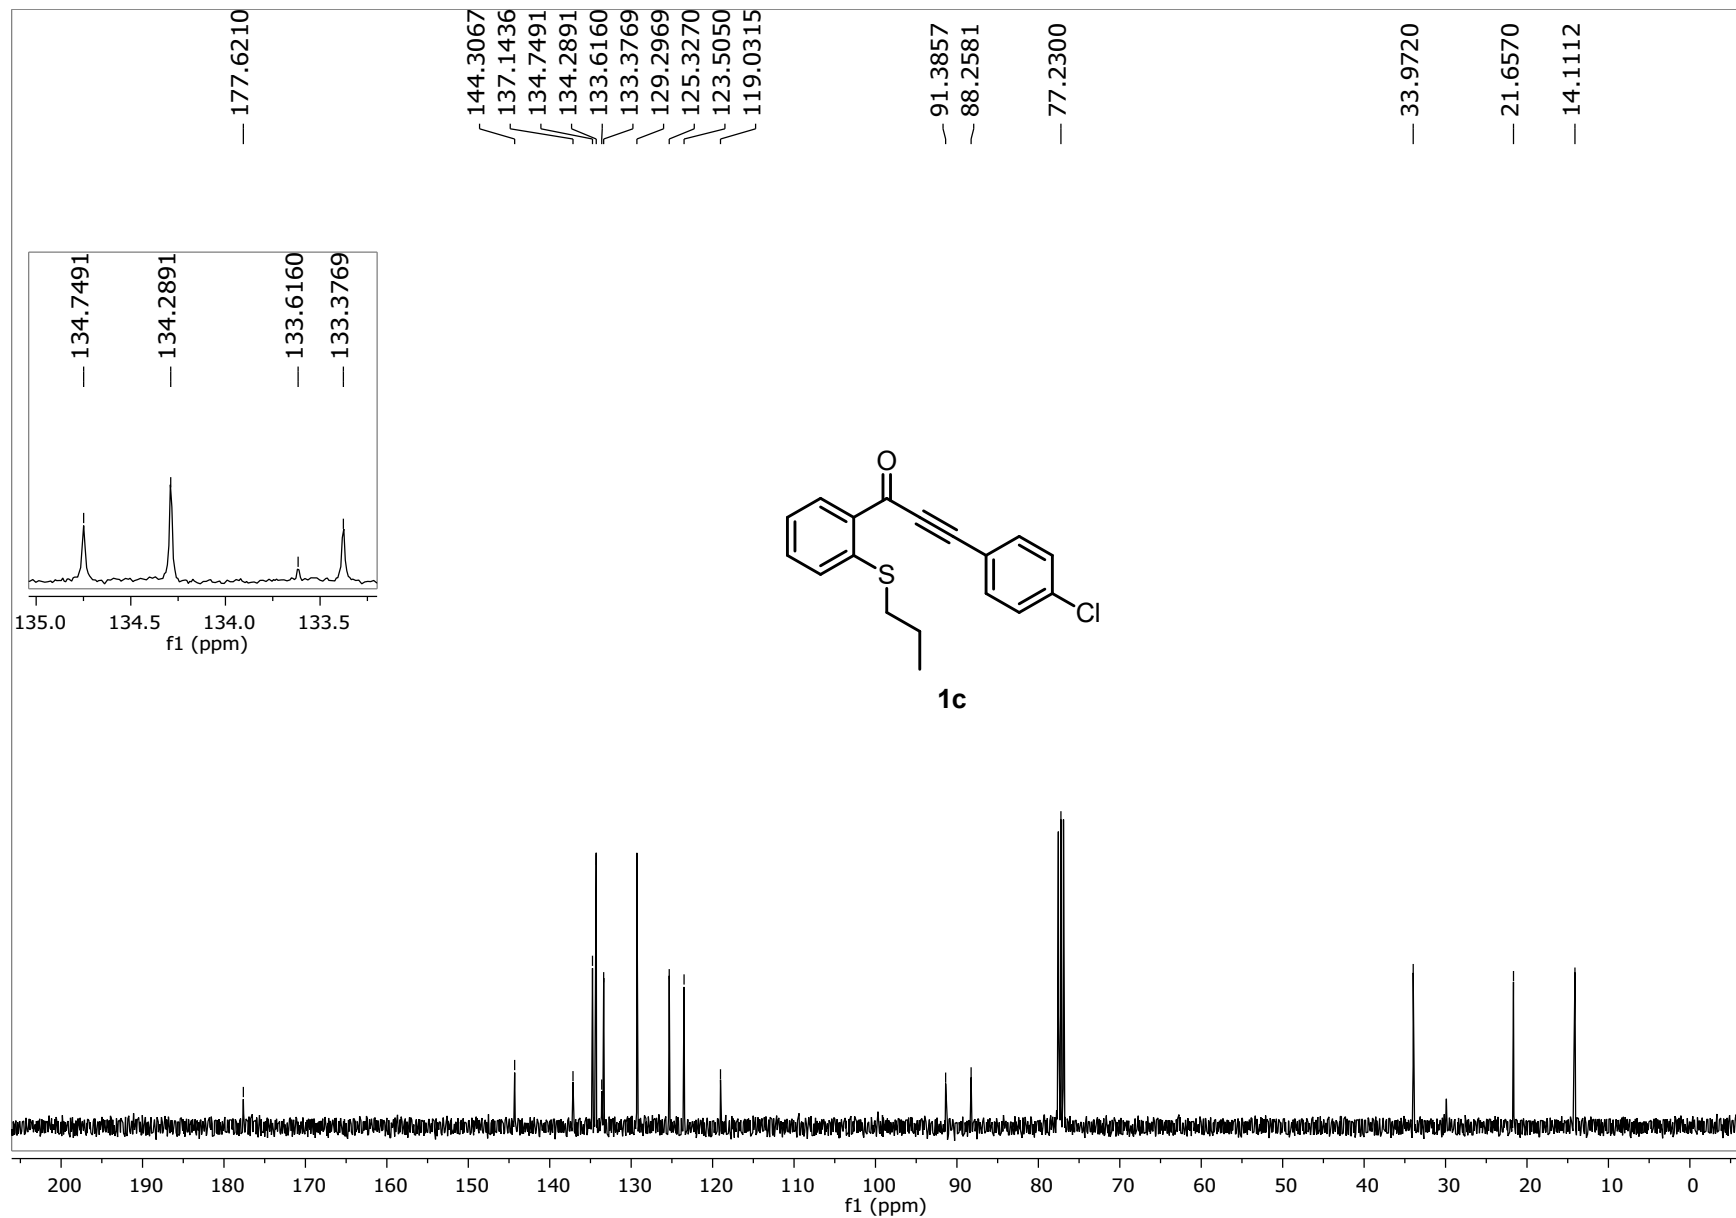

**Figure S6:**  $^{13}\text{C}\{^1\text{H}\}$  NMR (100 MHz,  $\text{CDCl}_3$ ) spectrum of compound **1c**.

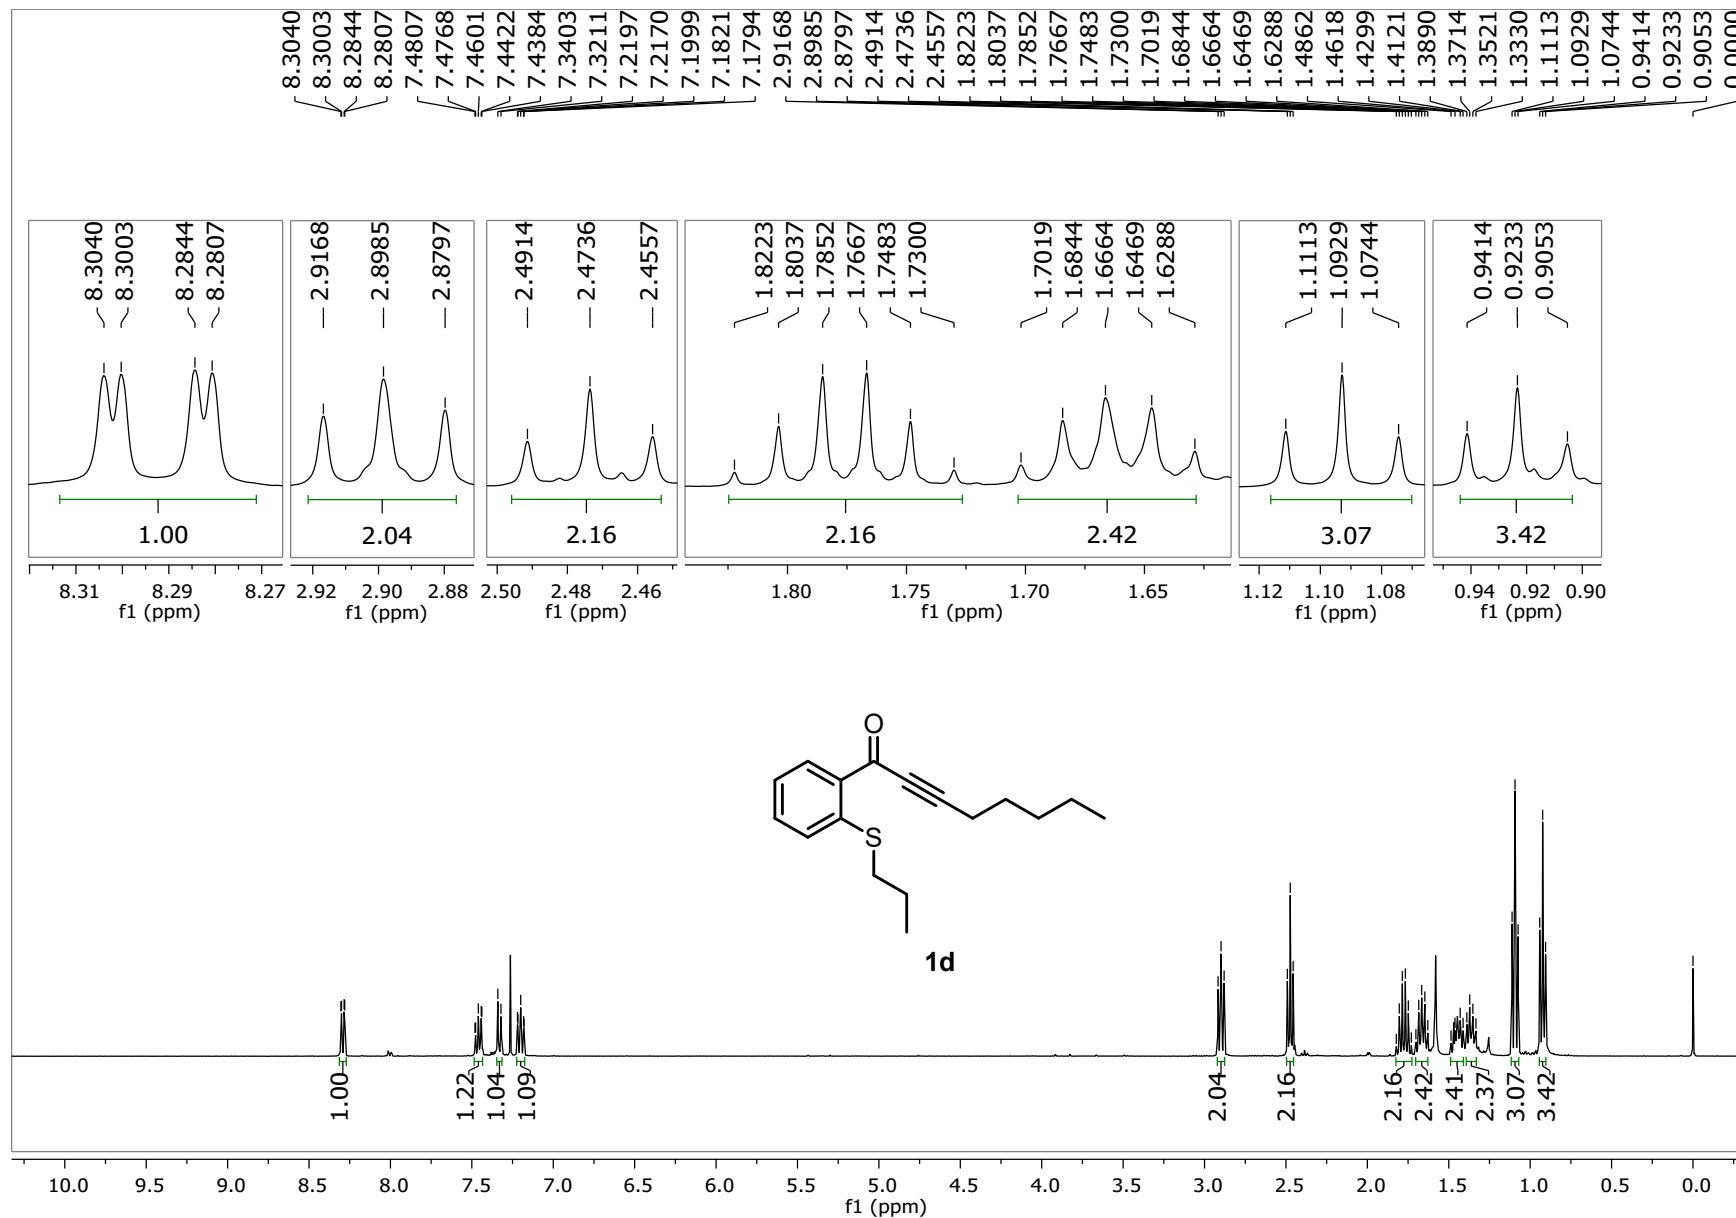

Figure S7: <sup>1</sup>H NMR (400 MHz, CDCl<sub>3</sub>) spectrum of compound **1d**.



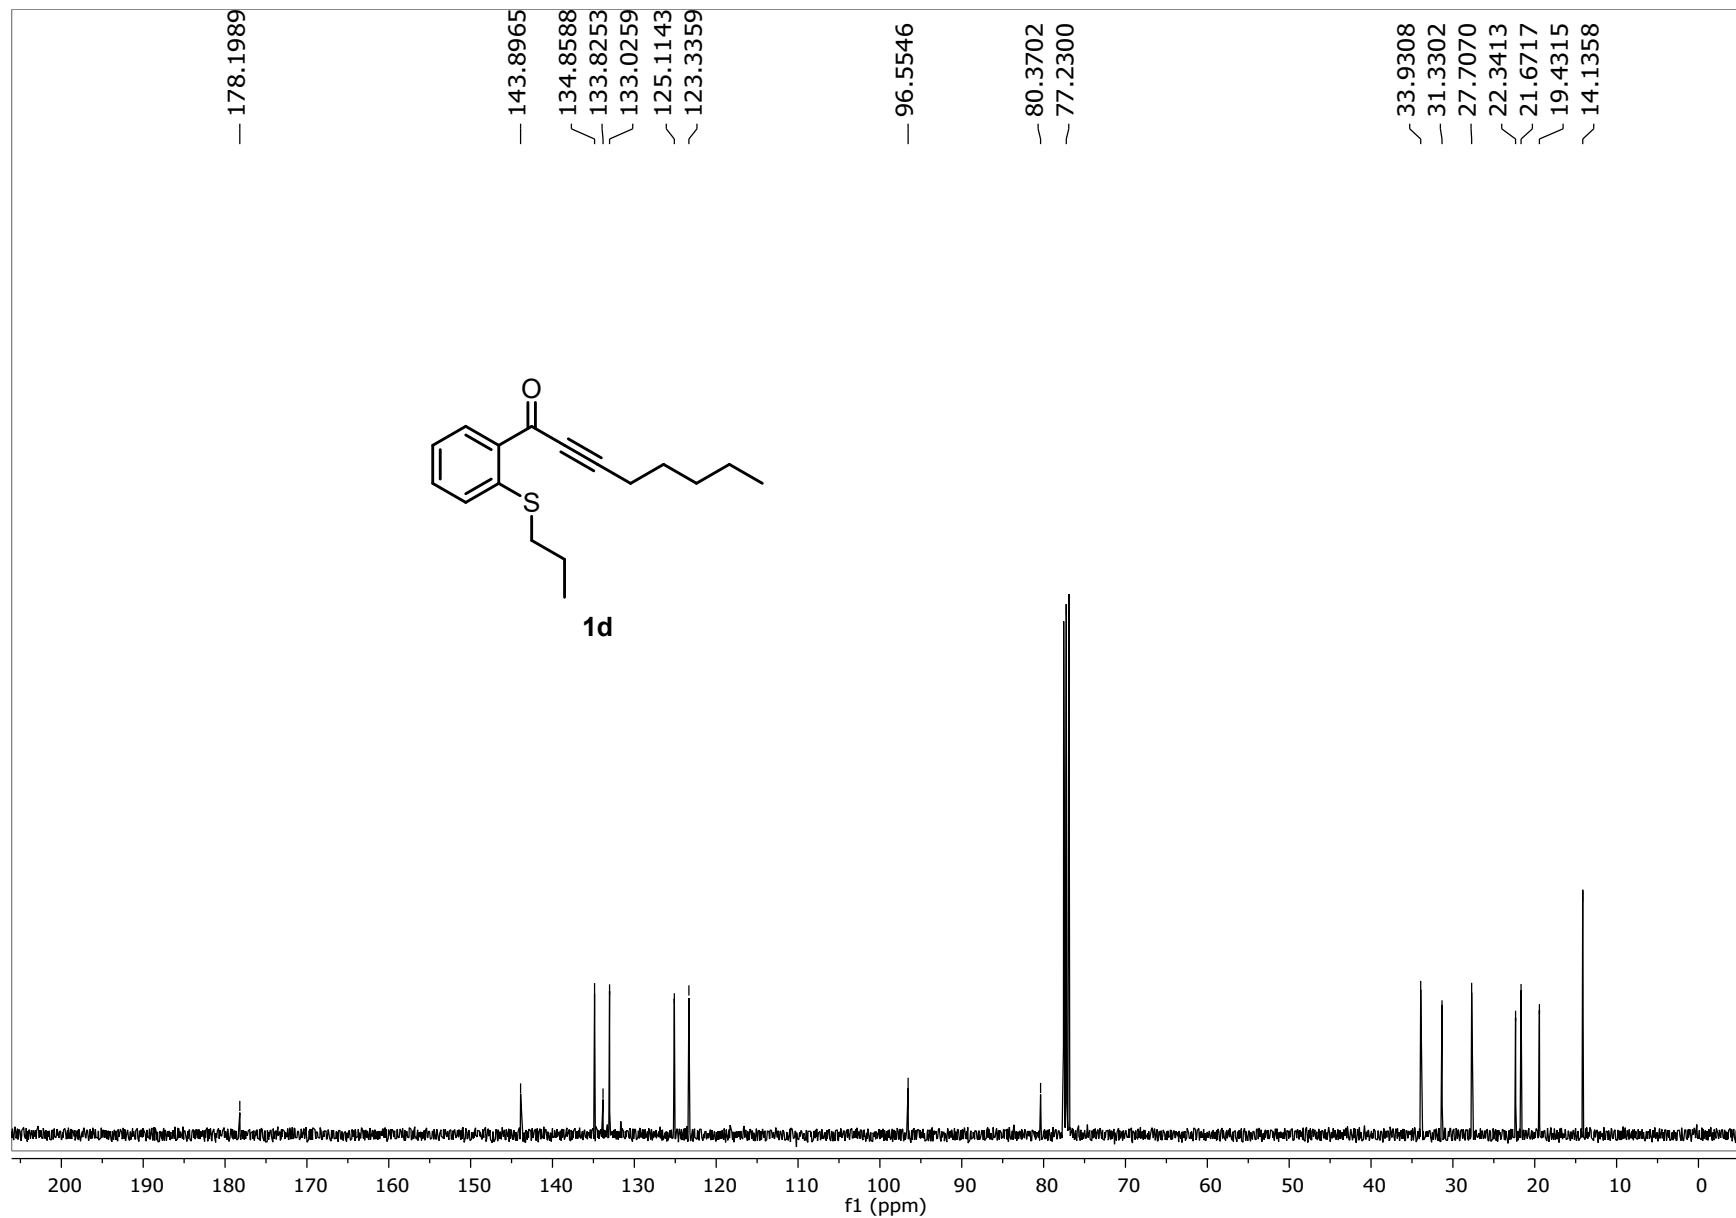

Figure S8:  $^{13}\text{C}\{^1\text{H}\}$  NMR (100 MHz,  $\text{CDCl}_3$ ) spectrum of compound **1d**.

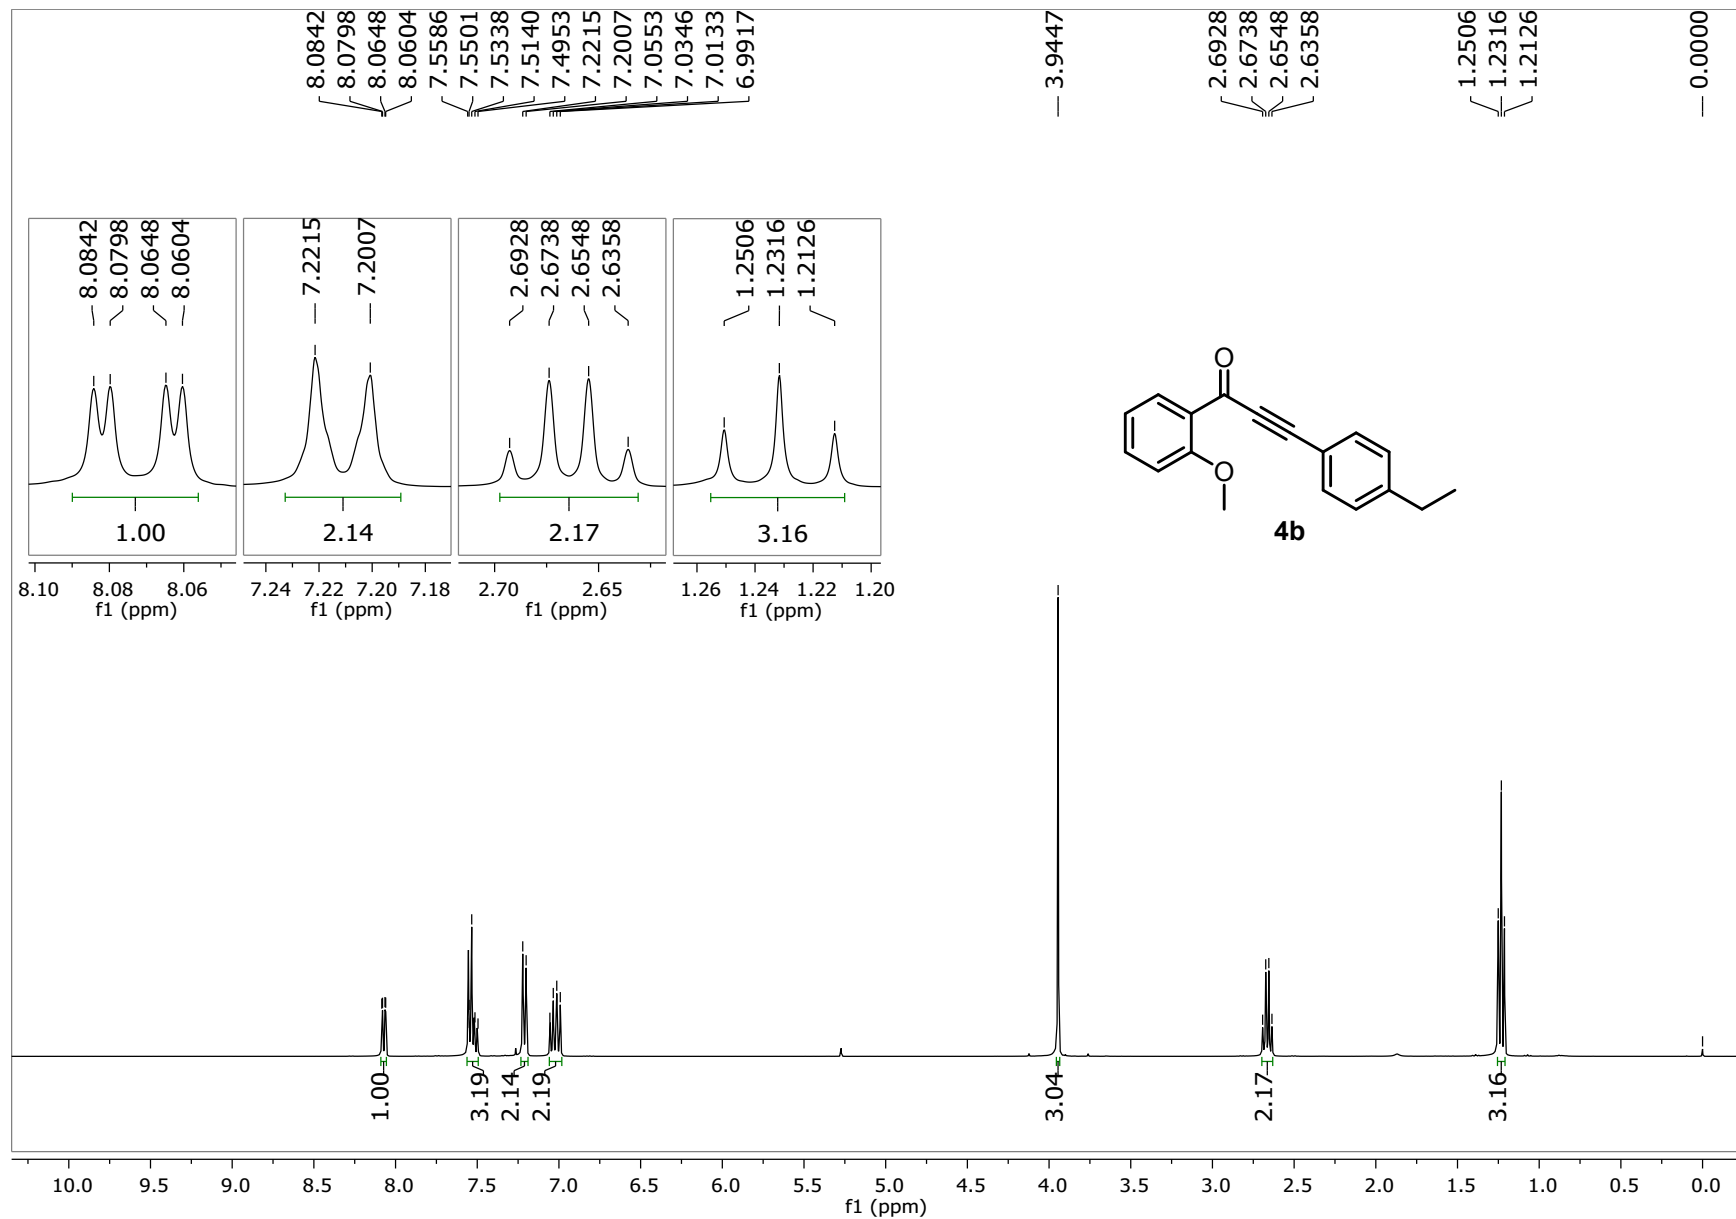

Figure S9: <sup>1</sup>H NMR (400 MHz, CDCl<sub>3</sub>) spectrum of compound **4b**.

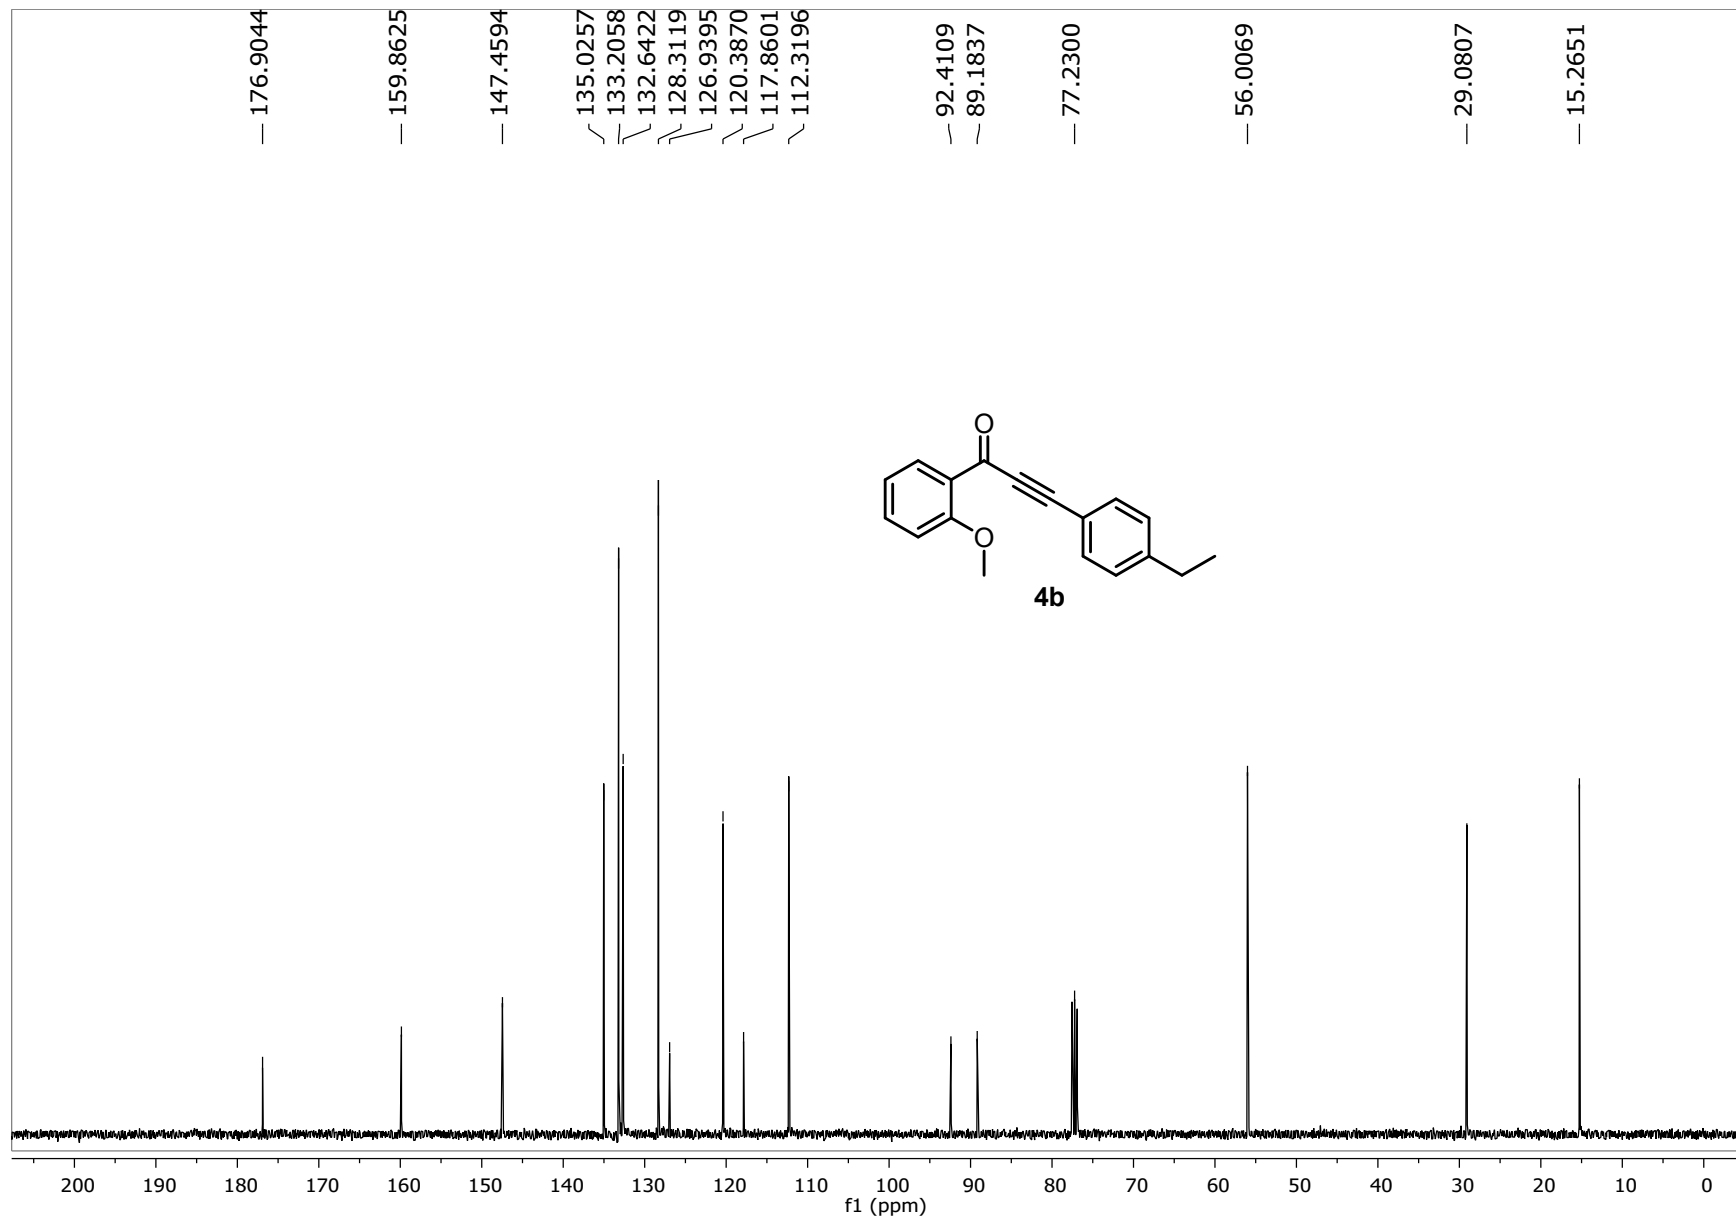

Figure S10:  $^{13}\text{C}\{^1\text{H}\}$  NMR (100 MHz,  $\text{CDCl}_3$ ) spectrum of compound **4b**.

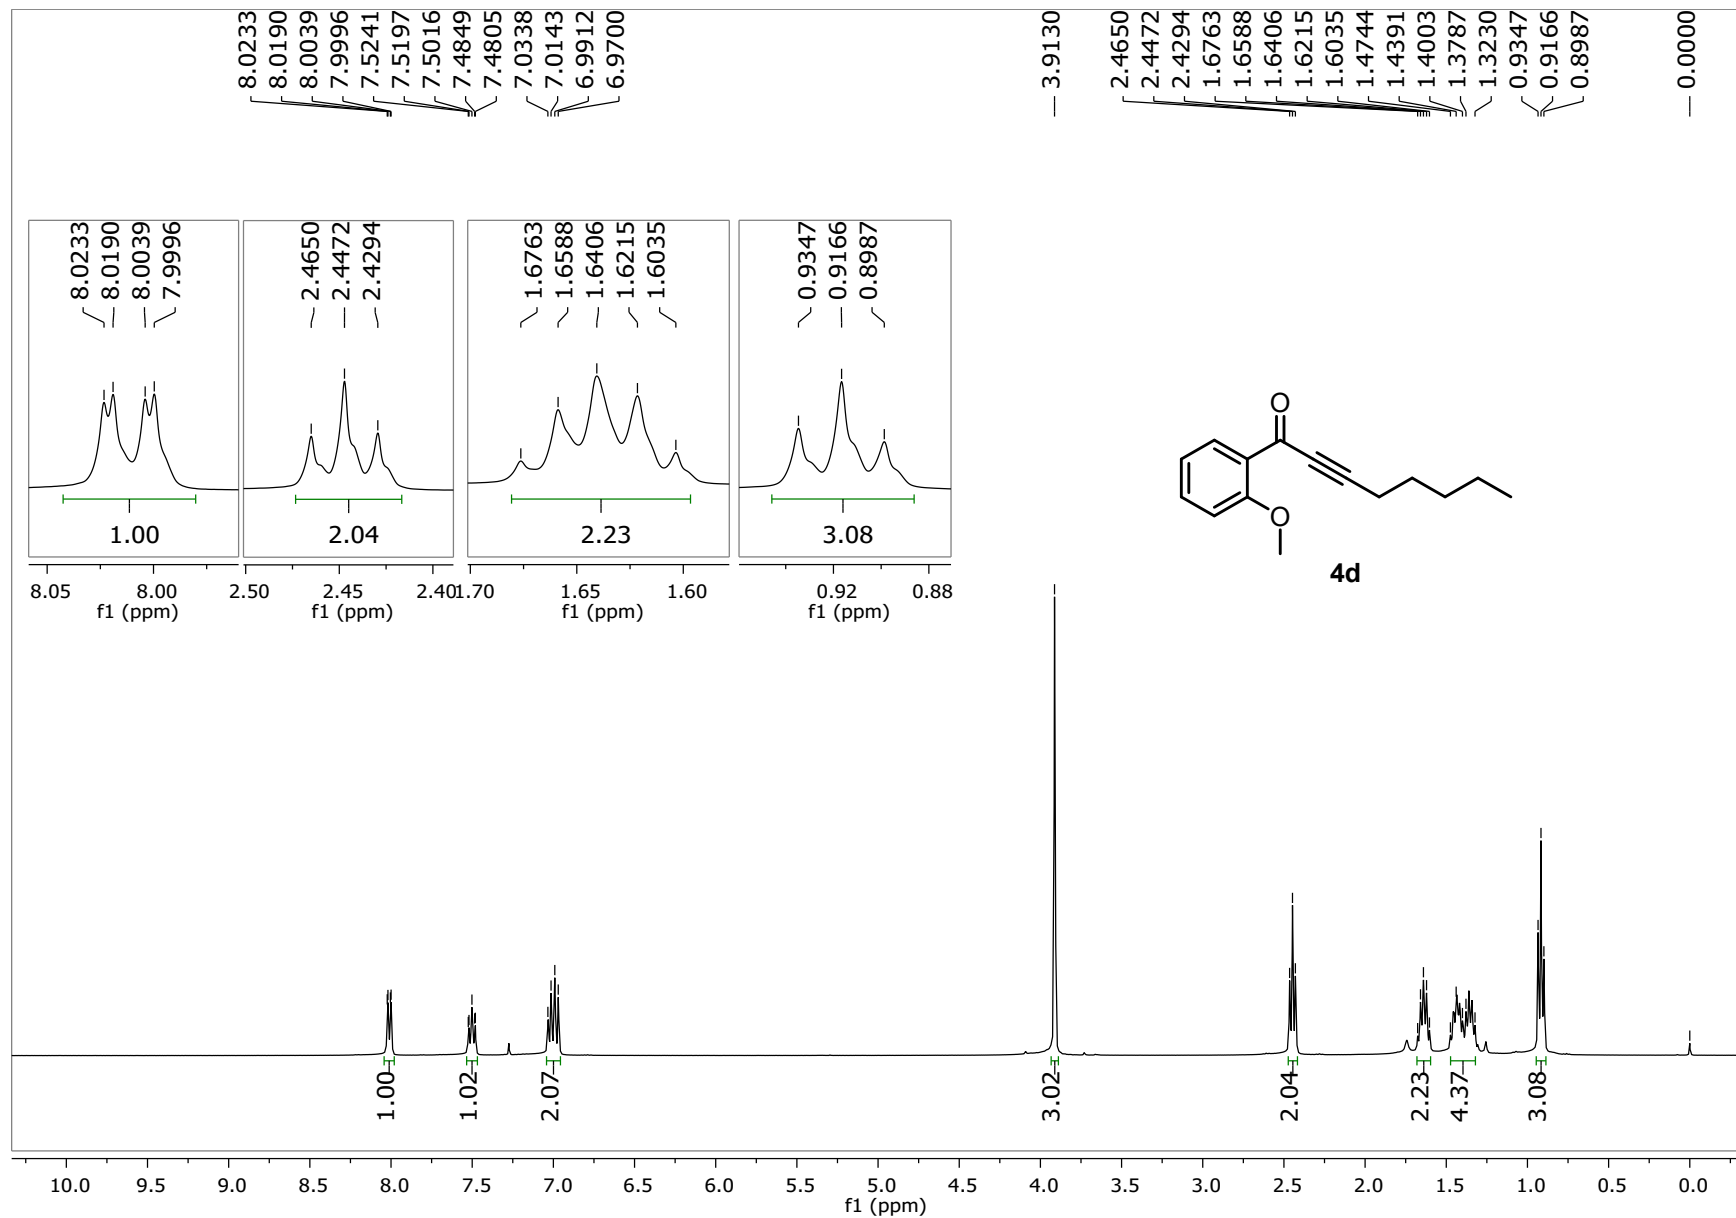

Figure S11:  $^1\text{H}$  NMR (400 MHz,  $\text{CDCl}_3$ ) spectrum of compound **4d**.

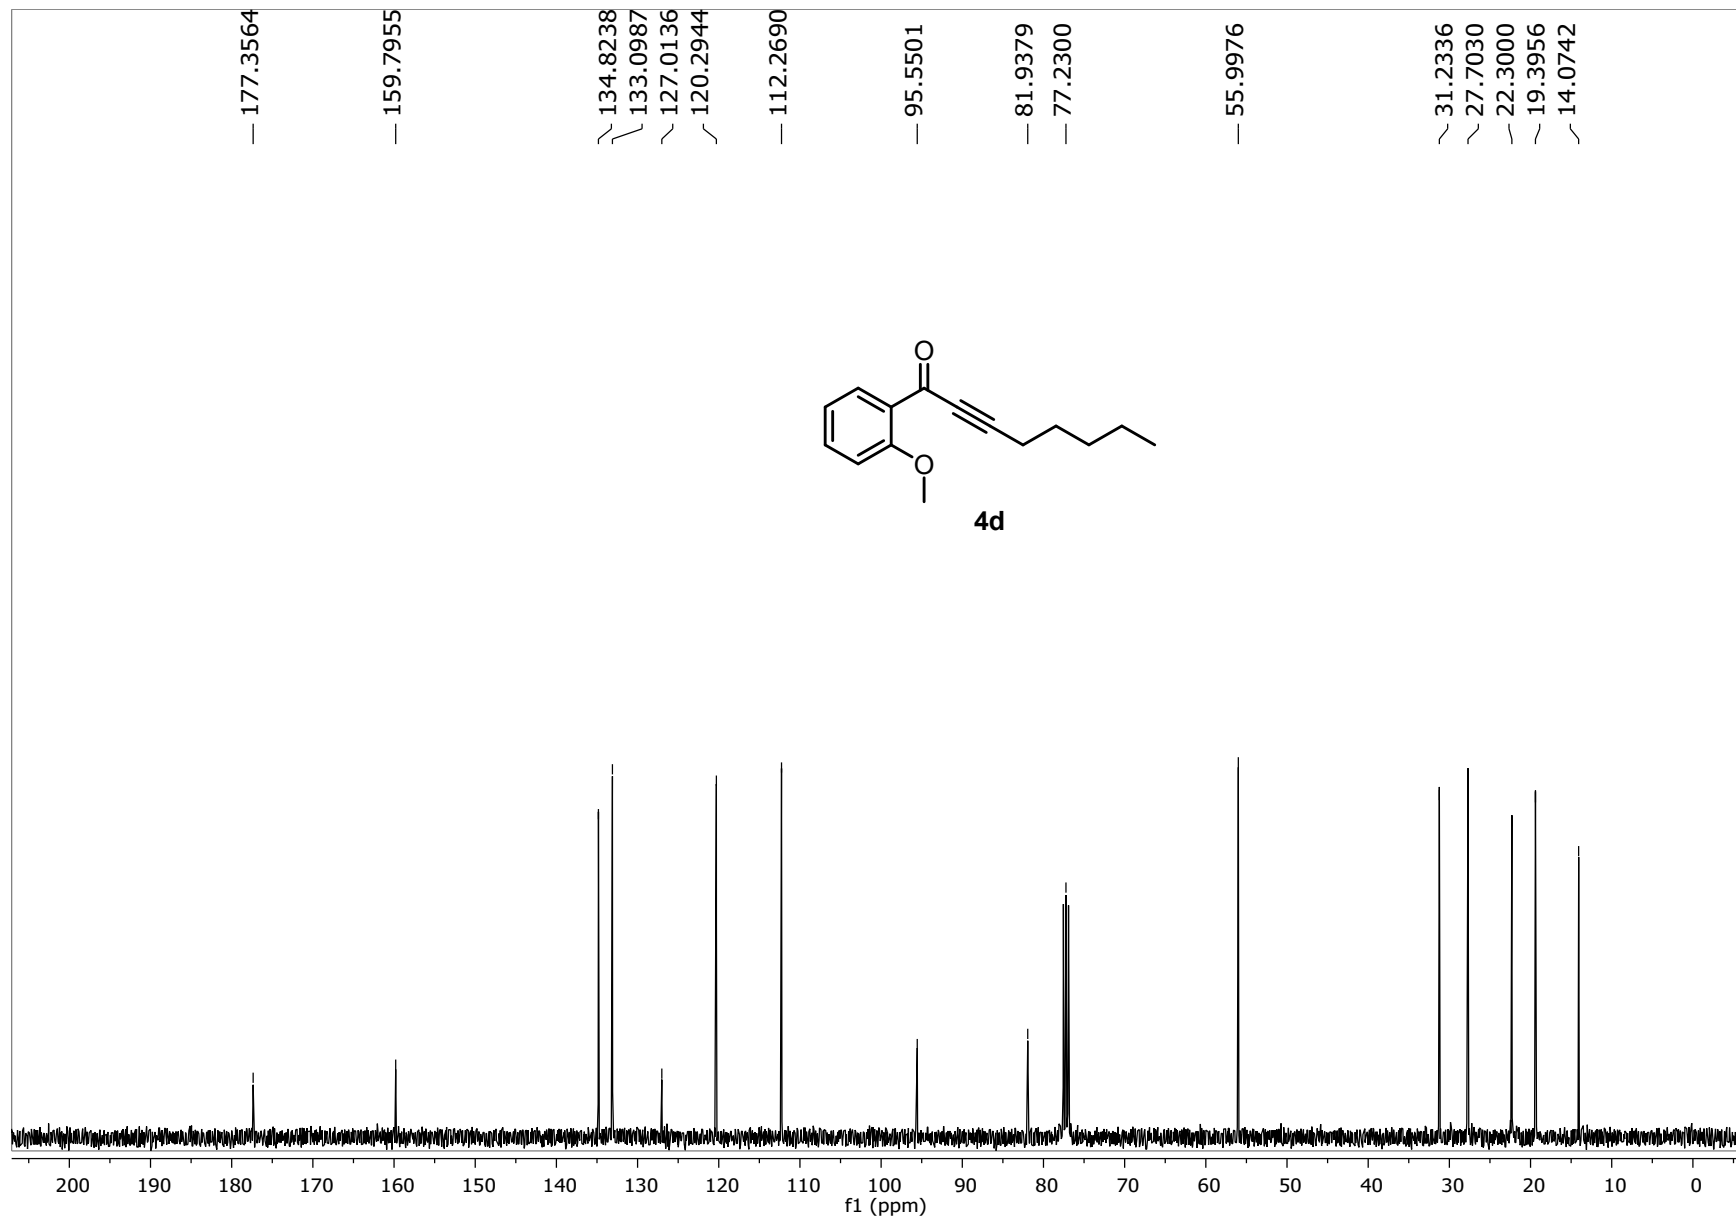

Figure S12:  $^{13}\text{C}\{^1\text{H}\}$  NMR (100 MHz,  $\text{CDCl}_3$ ) spectrum of compound 4d.

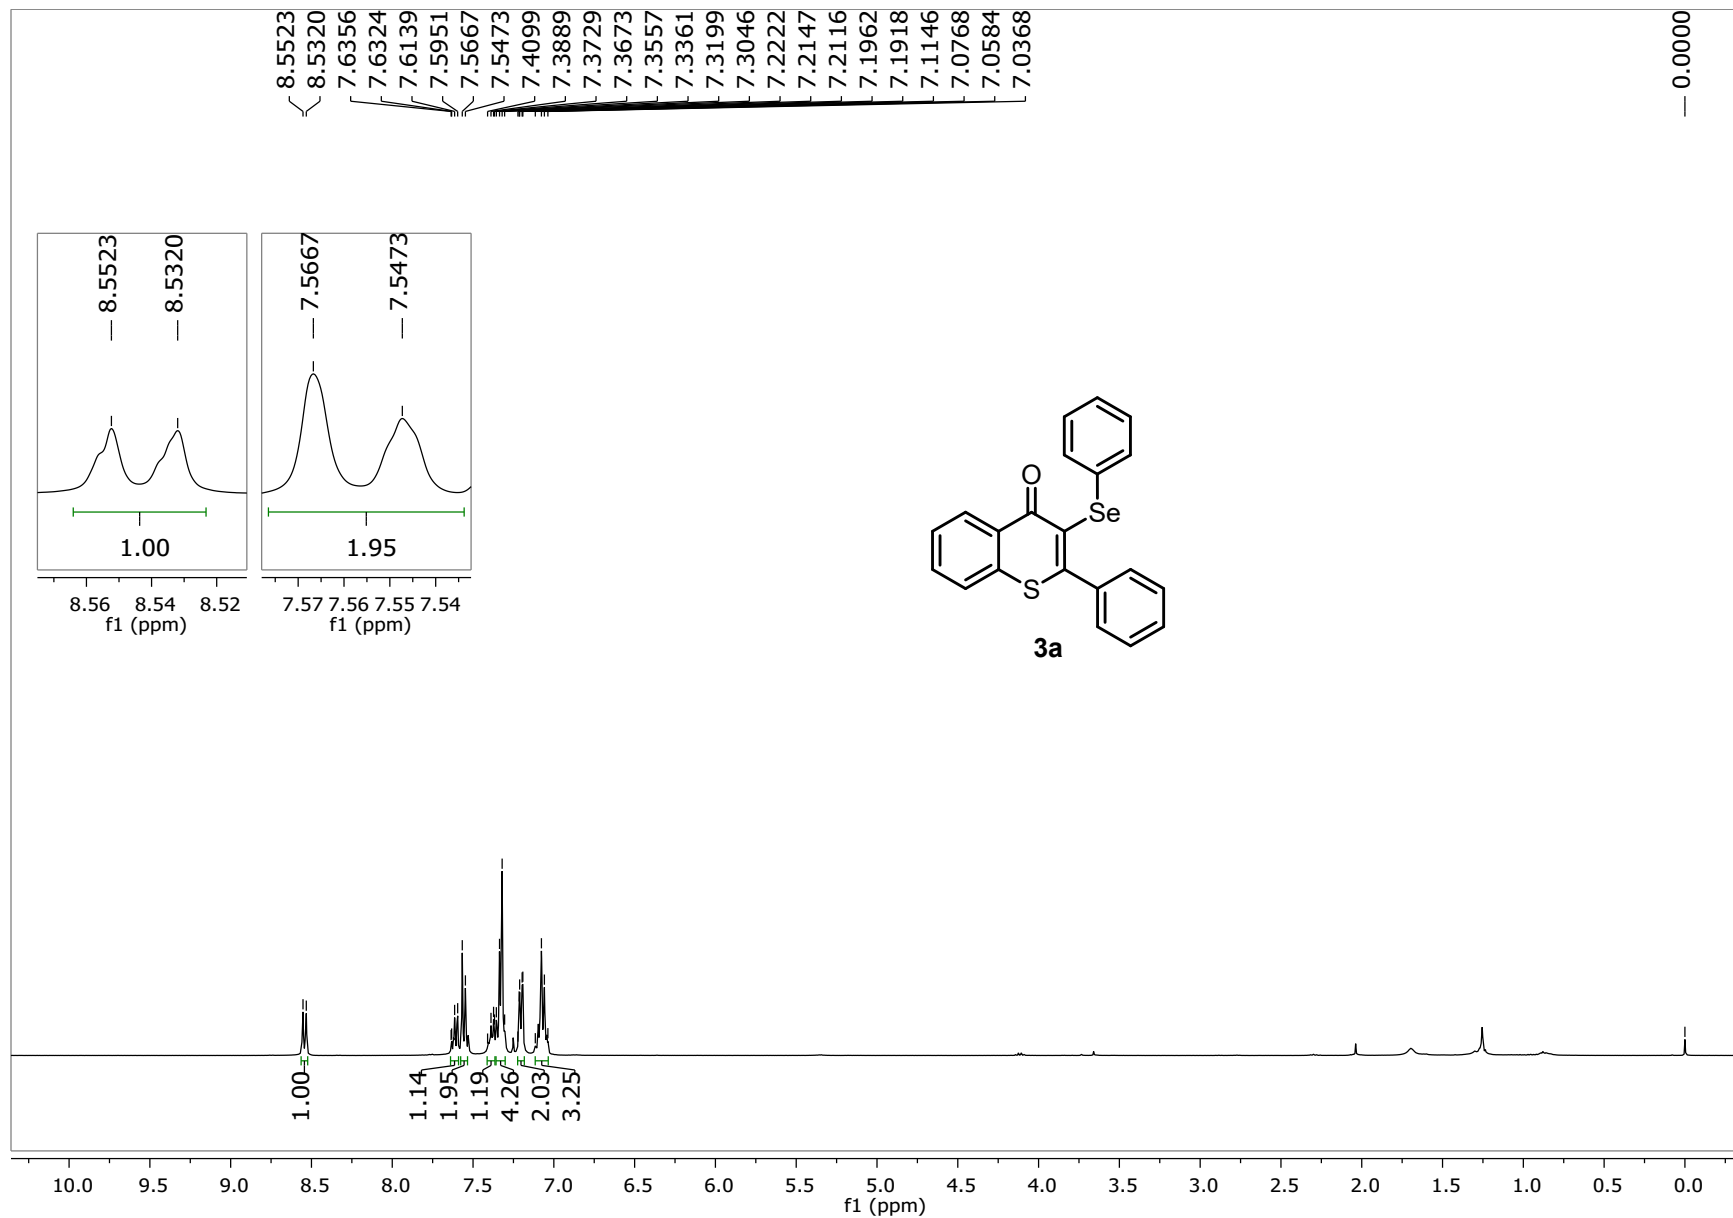

Figure S13:  $^1\text{H NMR}$  (400 MHz,  $\text{CDCl}_3$ ) spectrum of compound **3a**.

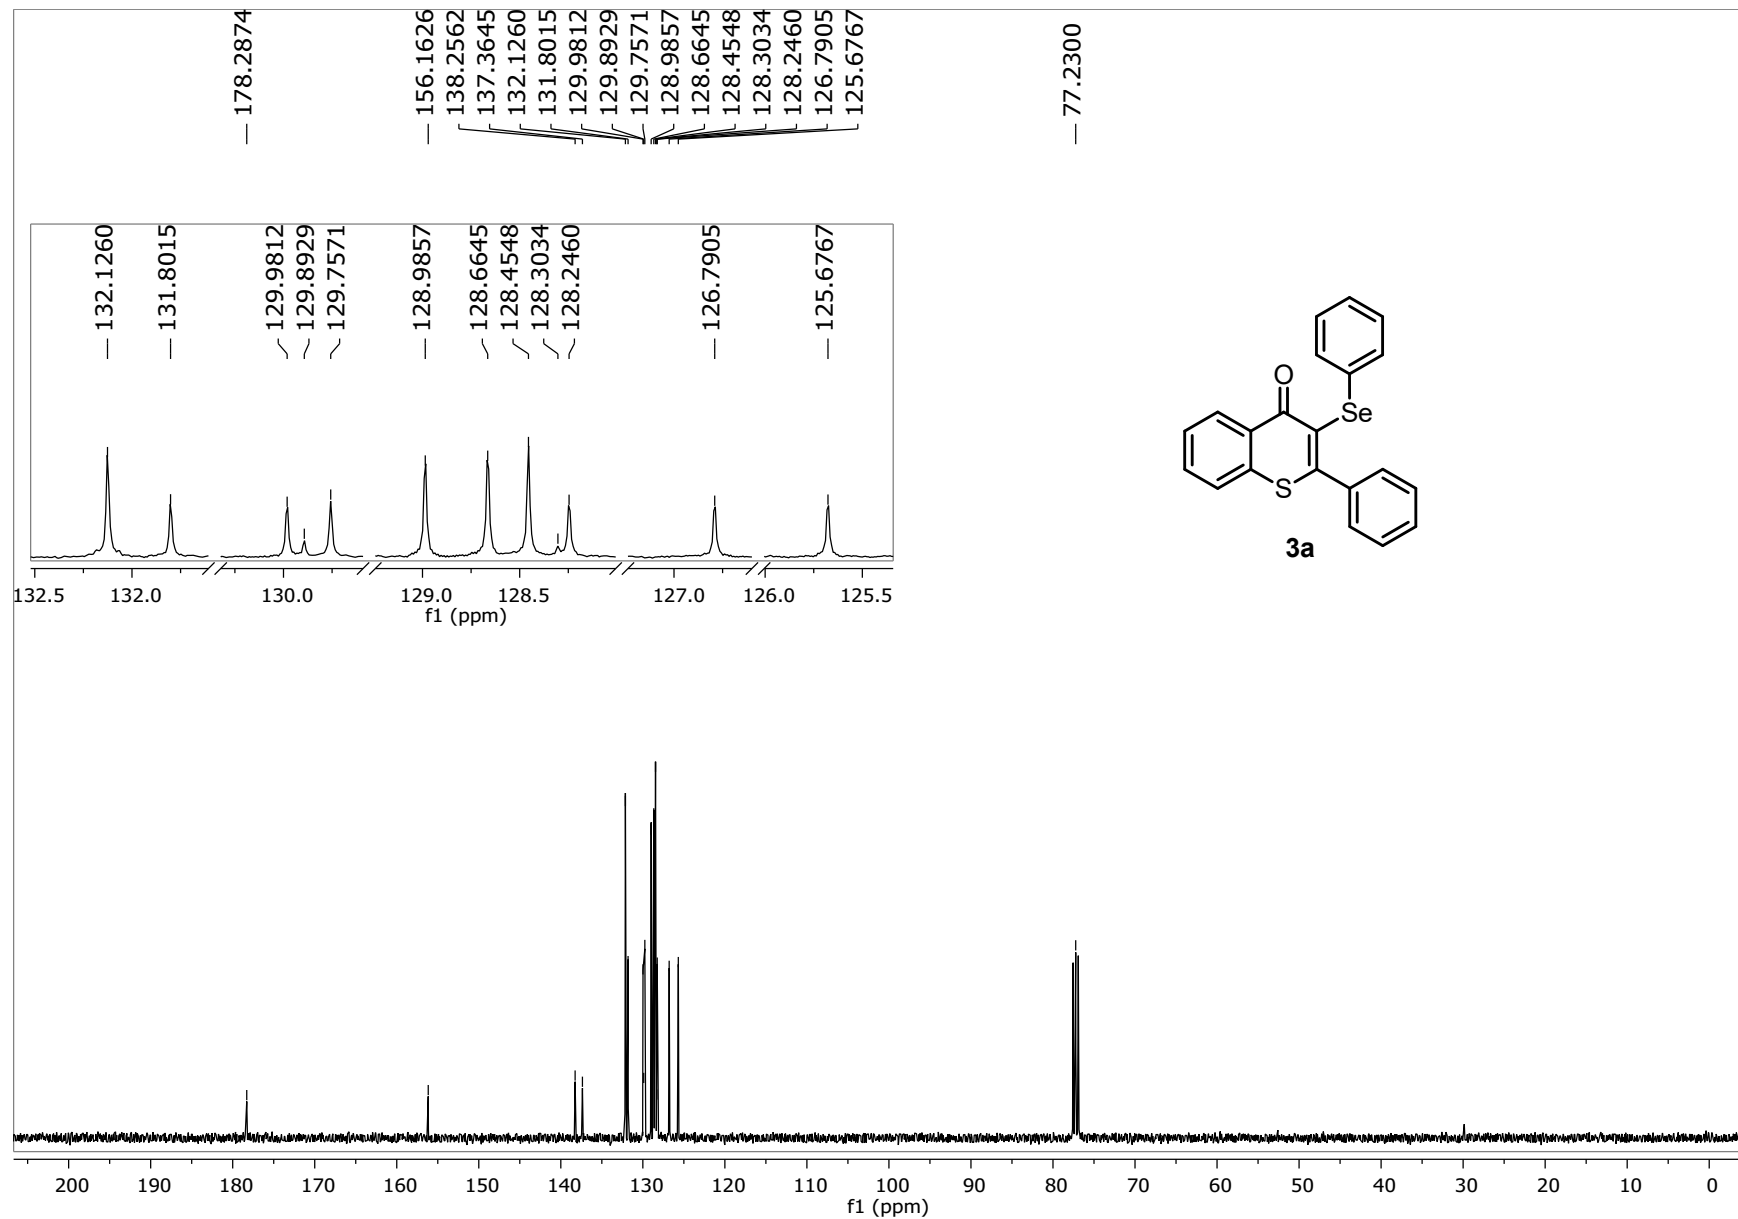

Figure S14: <sup>13</sup>C{<sup>1</sup>H} NMR (100 MHz, CDCl<sub>3</sub>) spectrum of compound **3a**.

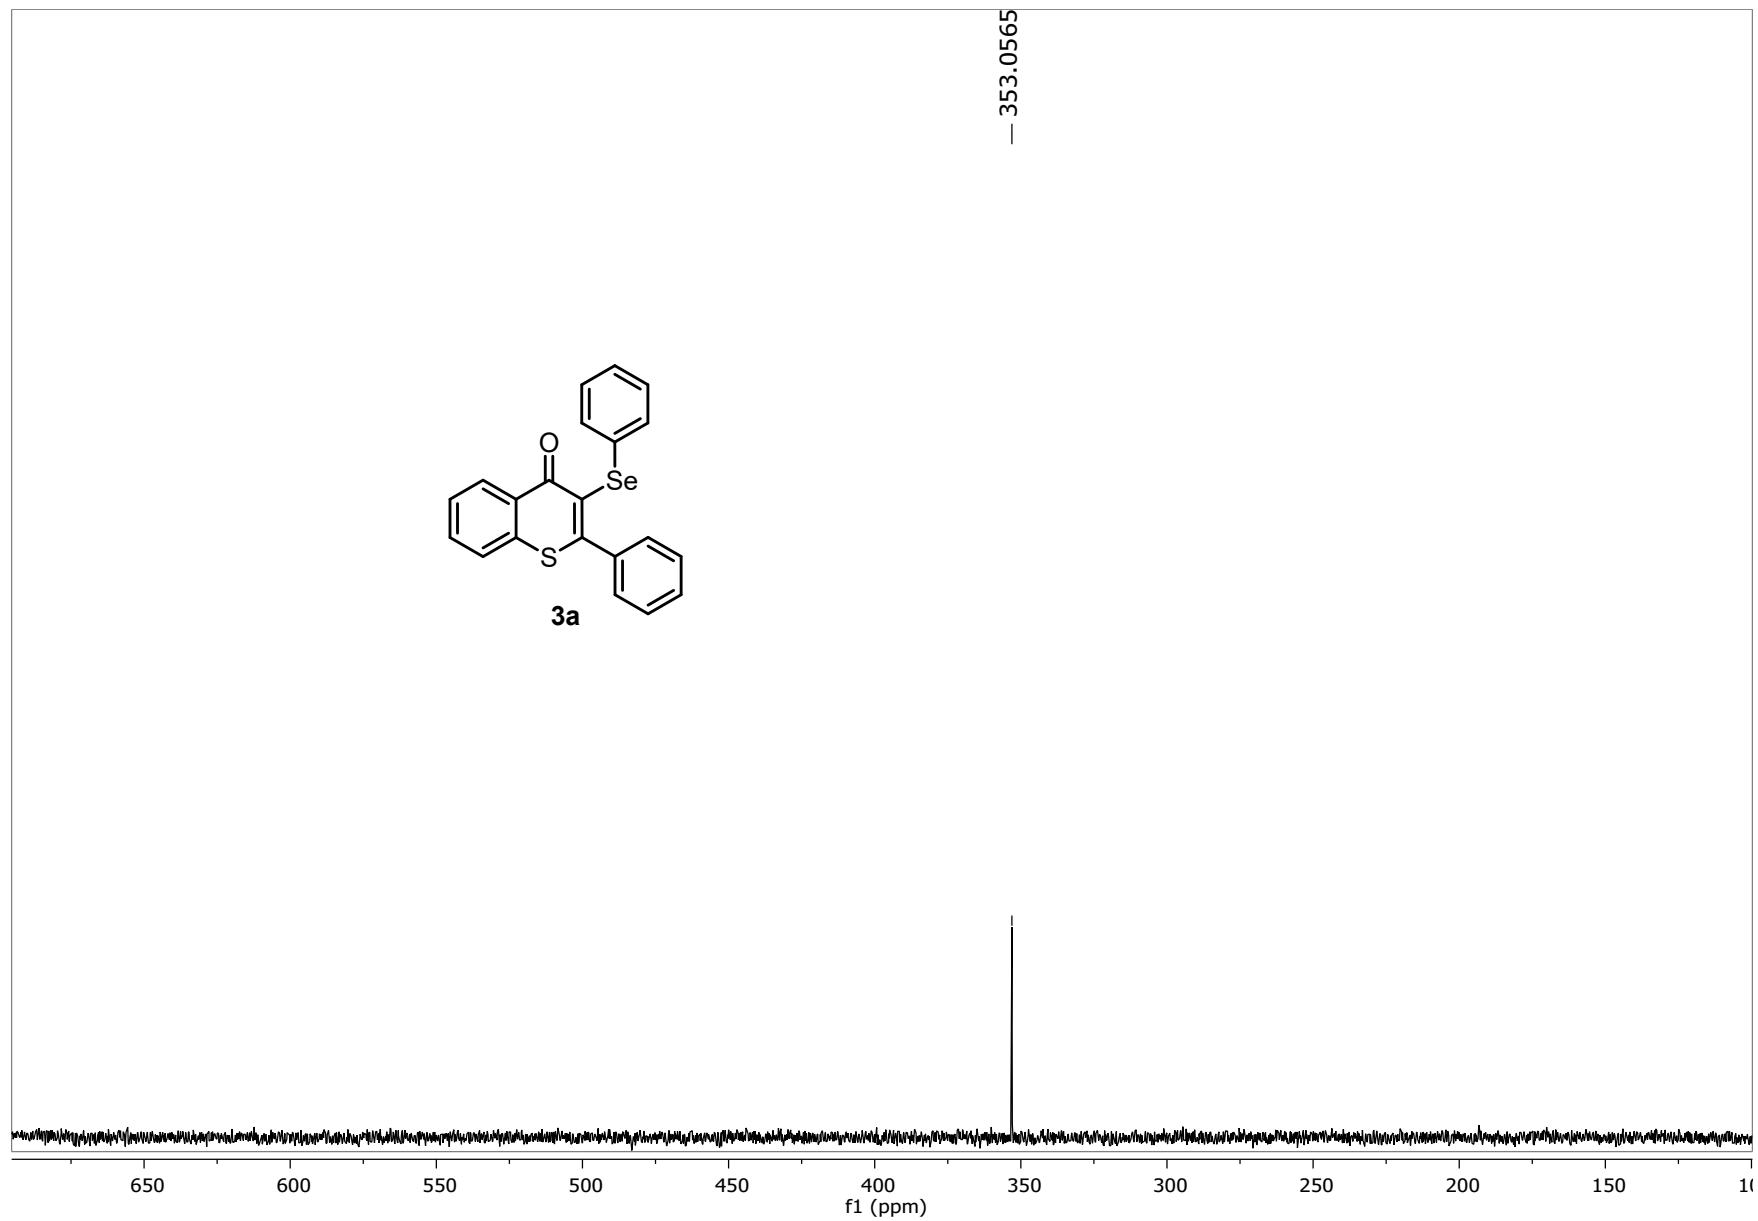

Figure S15:  $^{77}\text{Se}\{^1\text{H}\}$  NMR (76 MHz,  $\text{CDCl}_3$ ) spectrum of compound **3a**



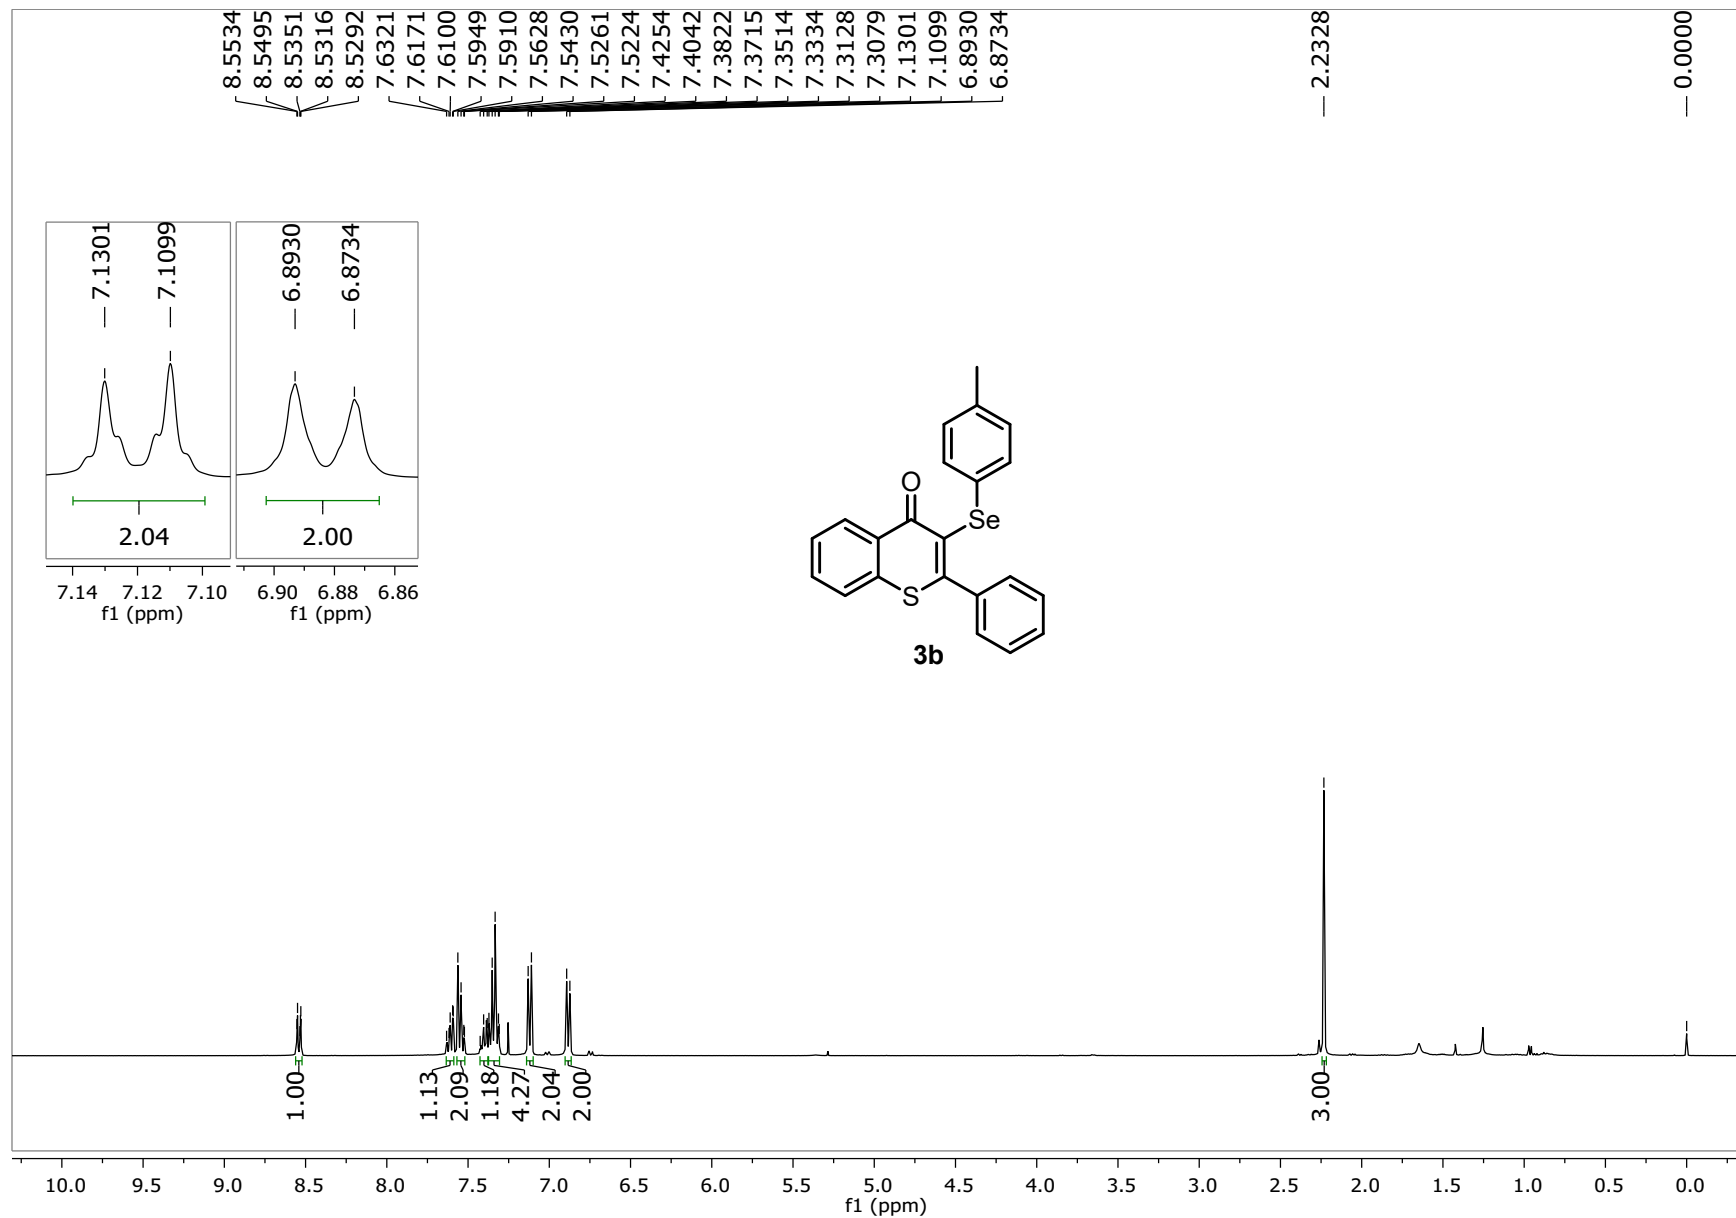

Figure S16: <sup>1</sup>H NMR (400 MHz, CDCl<sub>3</sub>) spectrum of compound **3b**.

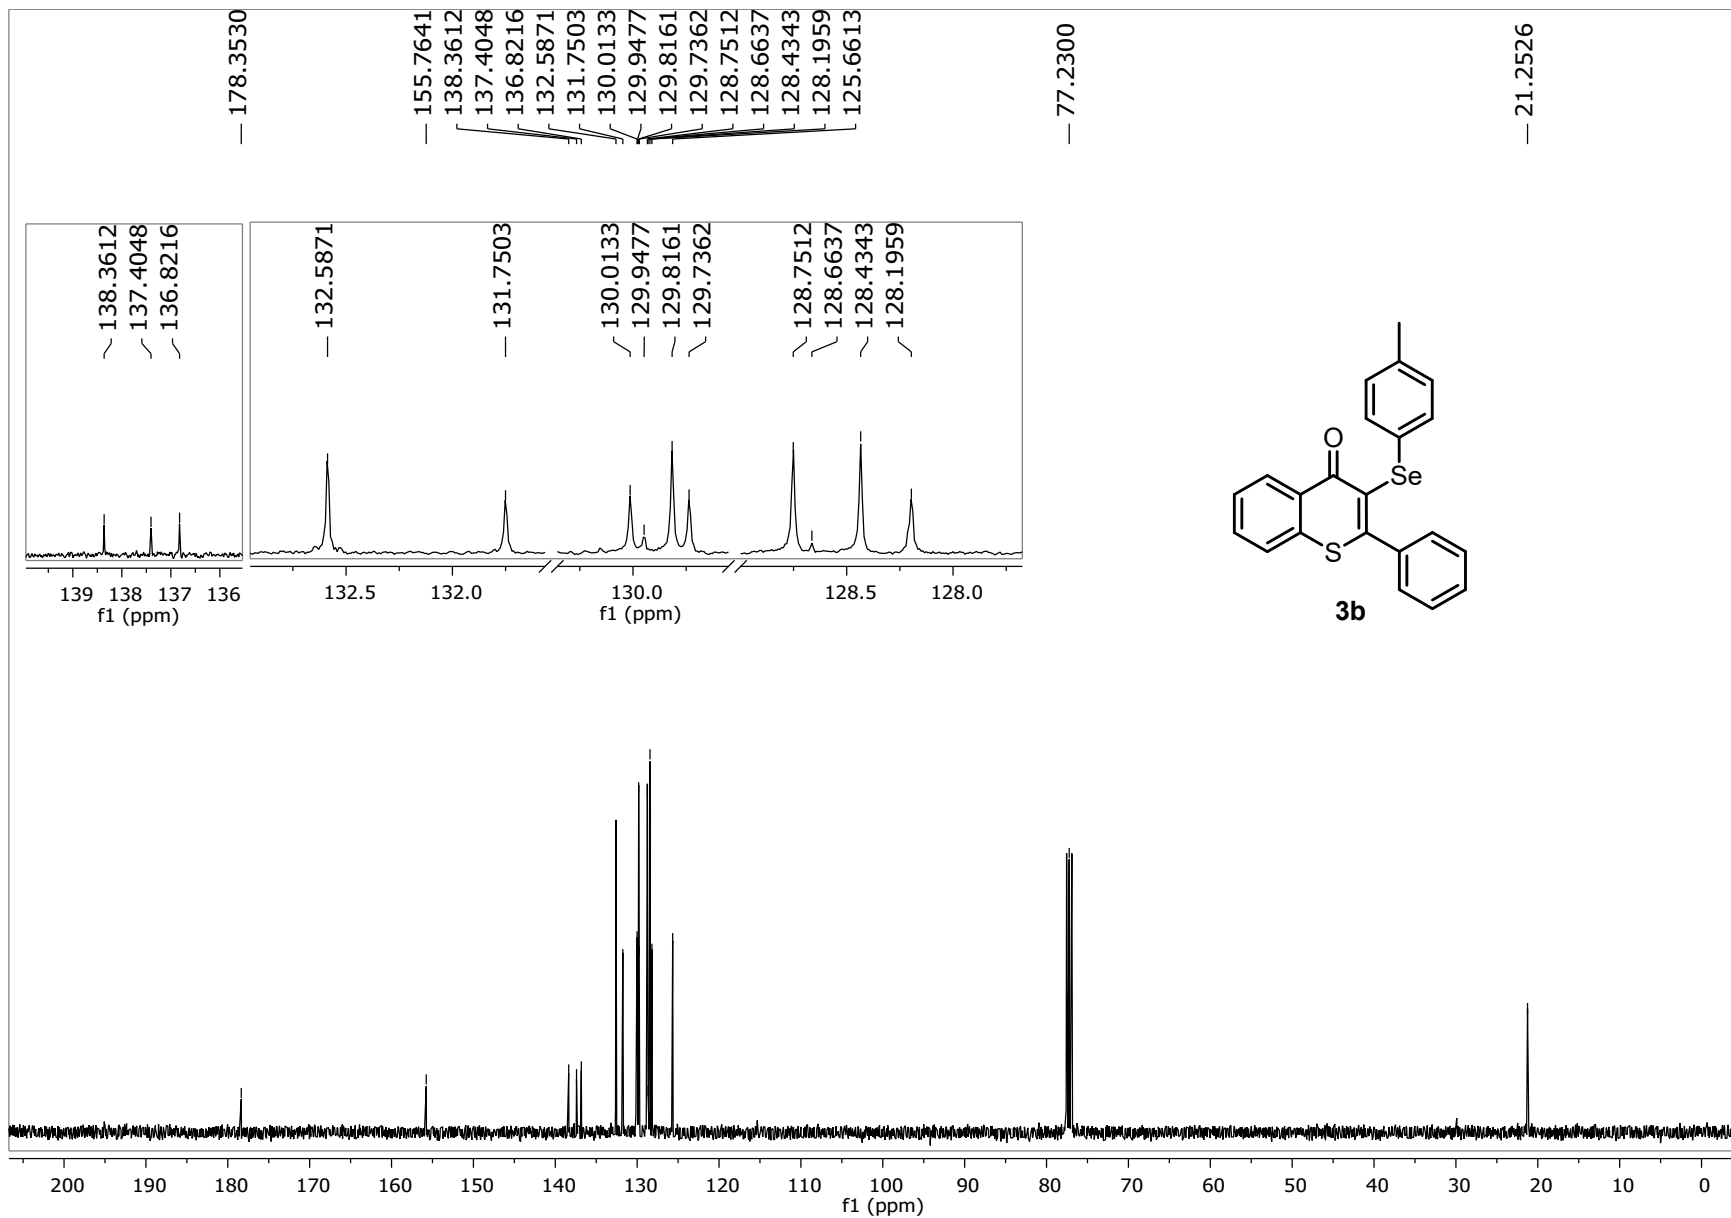

Figure S17:  $^{13}\text{C}\{^1\text{H}\}$  NMR (100 MHz,  $\text{CDCl}_3$ ) spectrum of compound **3b**.

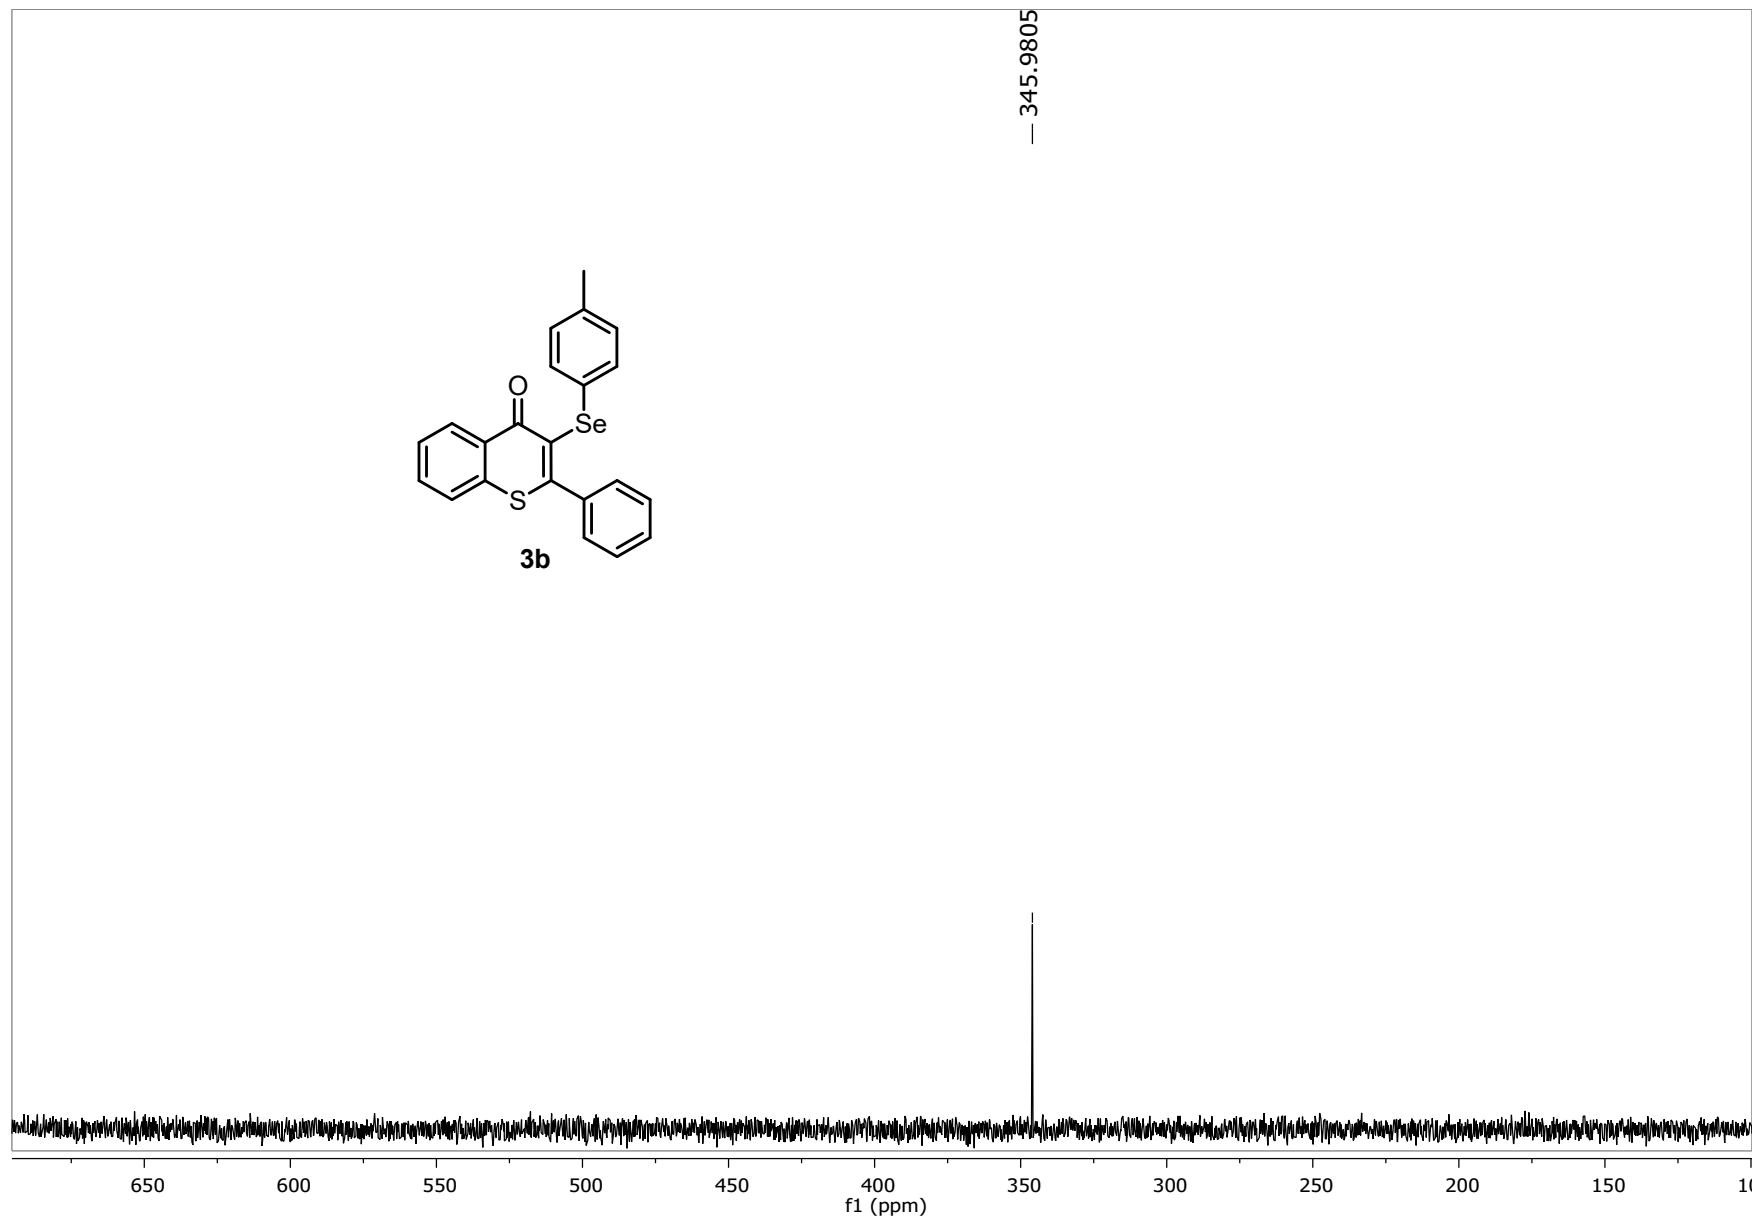

Figure S18:  $^{77}\text{Se}\{^1\text{H}\}$  NMR (76 MHz,  $\text{CDCl}_3$ ) spectrum of compound **3b**.

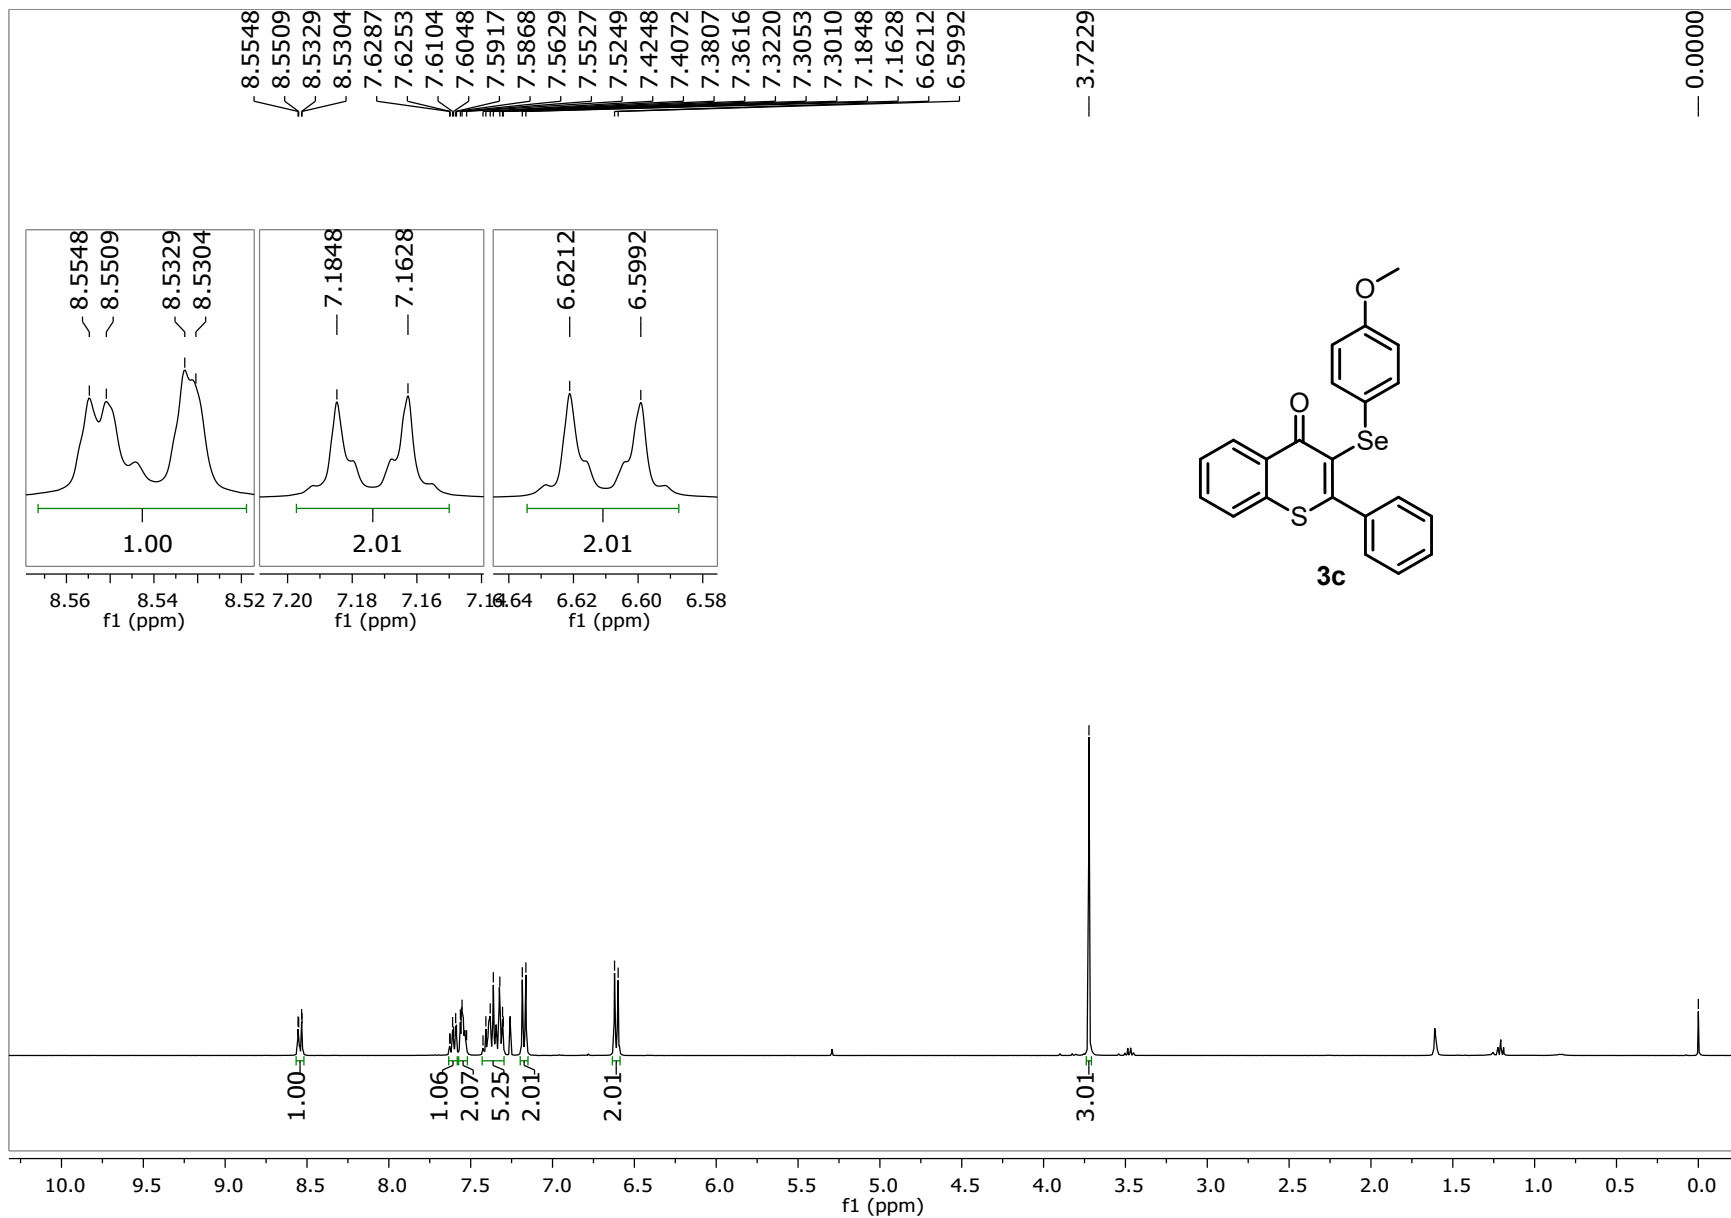

Figure S19: <sup>1</sup>H NMR (400 MHz, CDCl<sub>3</sub>) spectrum of compound **3c**.

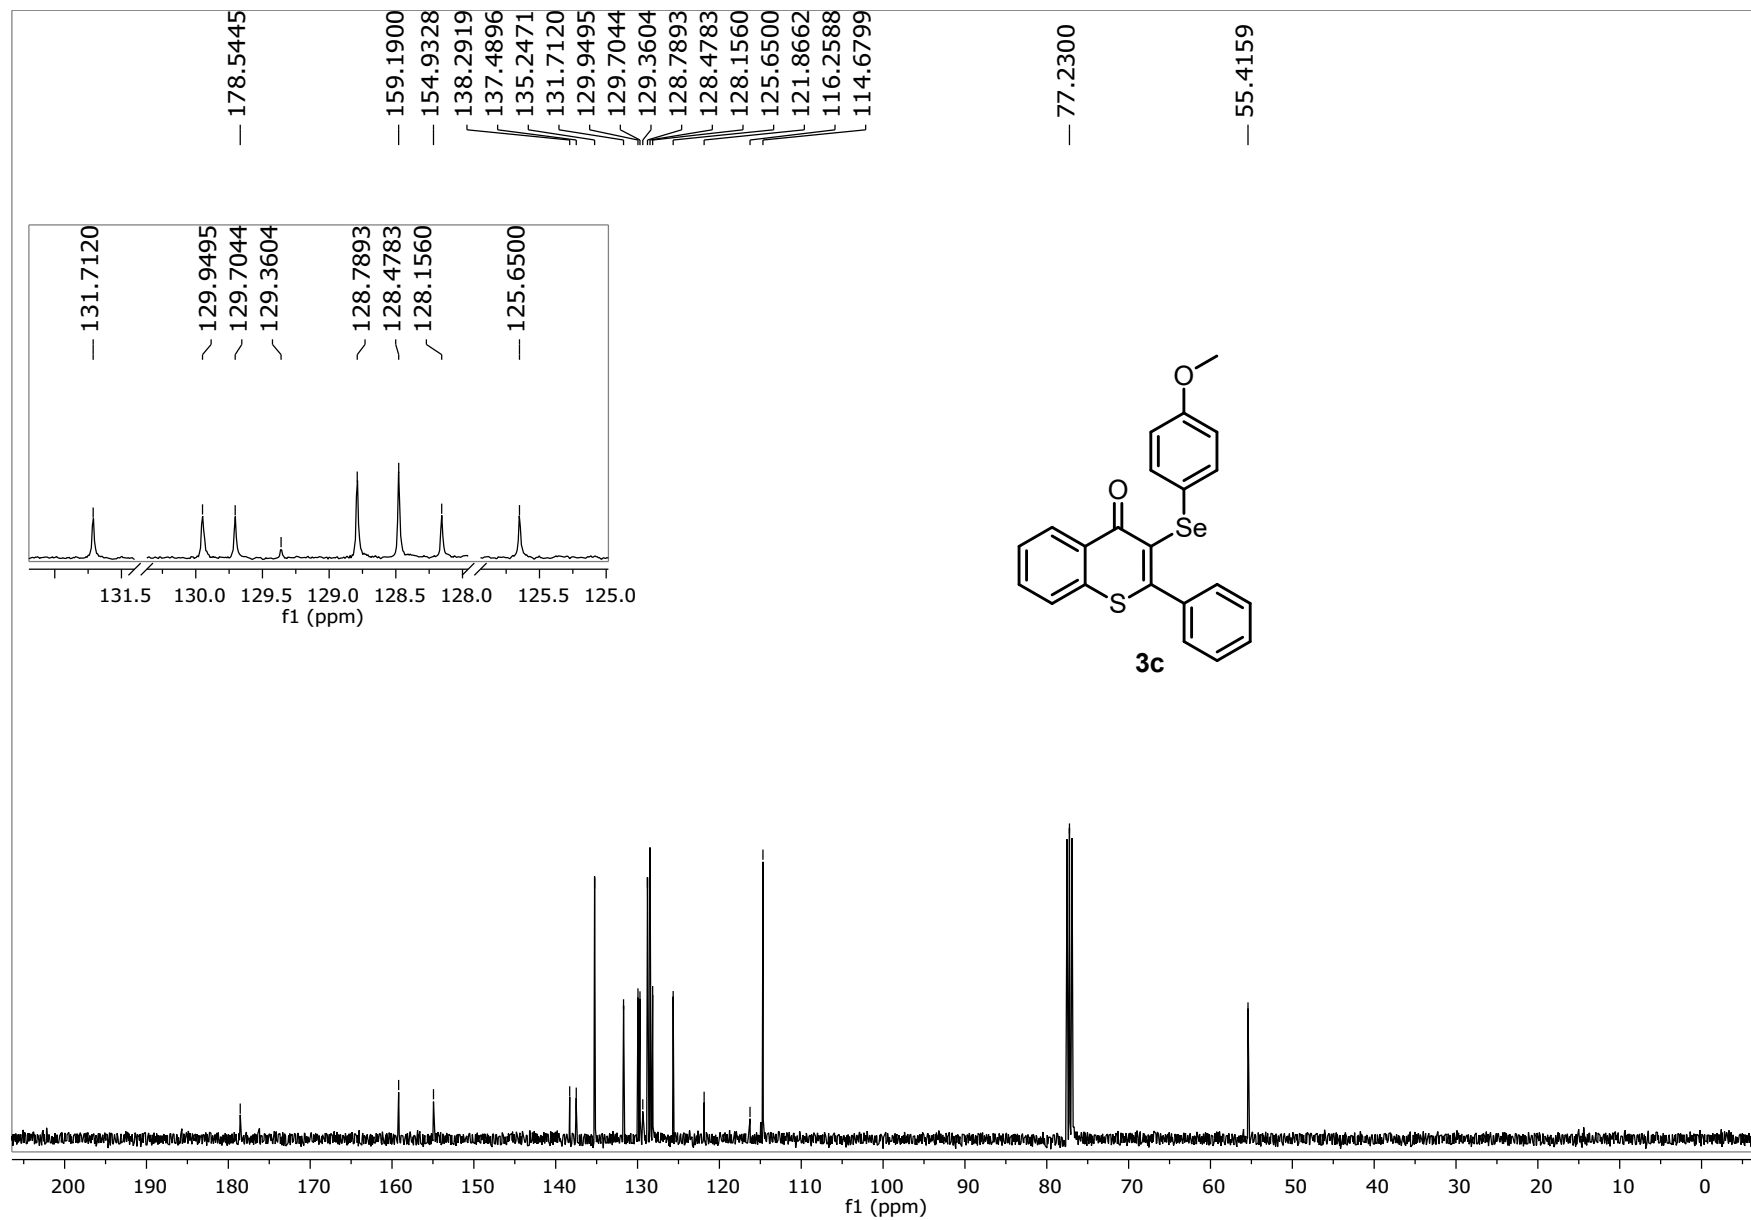

Figure S20: <sup>13</sup>C{<sup>1</sup>H} NMR (100 MHz, CDCl<sub>3</sub>) spectrum of compound **3c**.

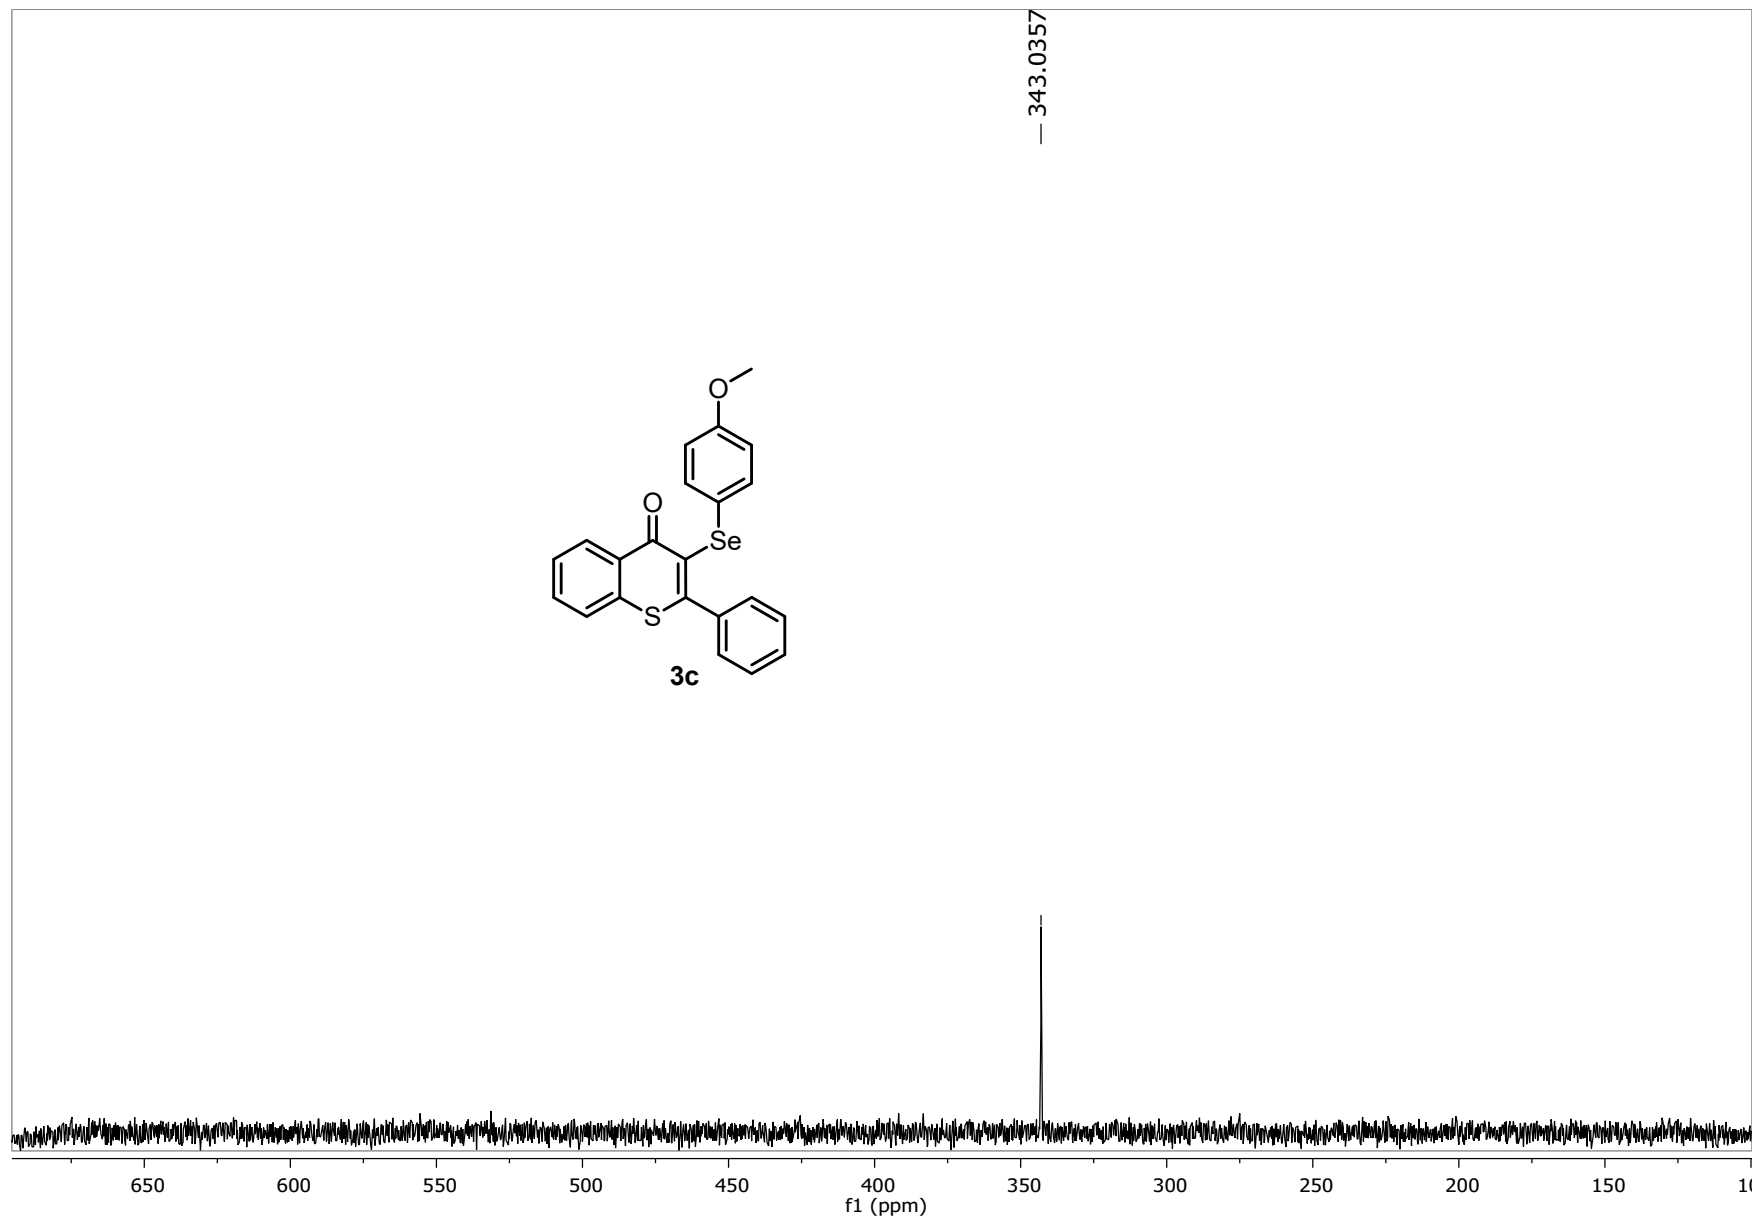

Figure S21:  $^{77}\text{Se}\{^1\text{H}\}$  NMR (76 MHz,  $\text{CDCl}_3$ ) spectrum of compound **3c**.

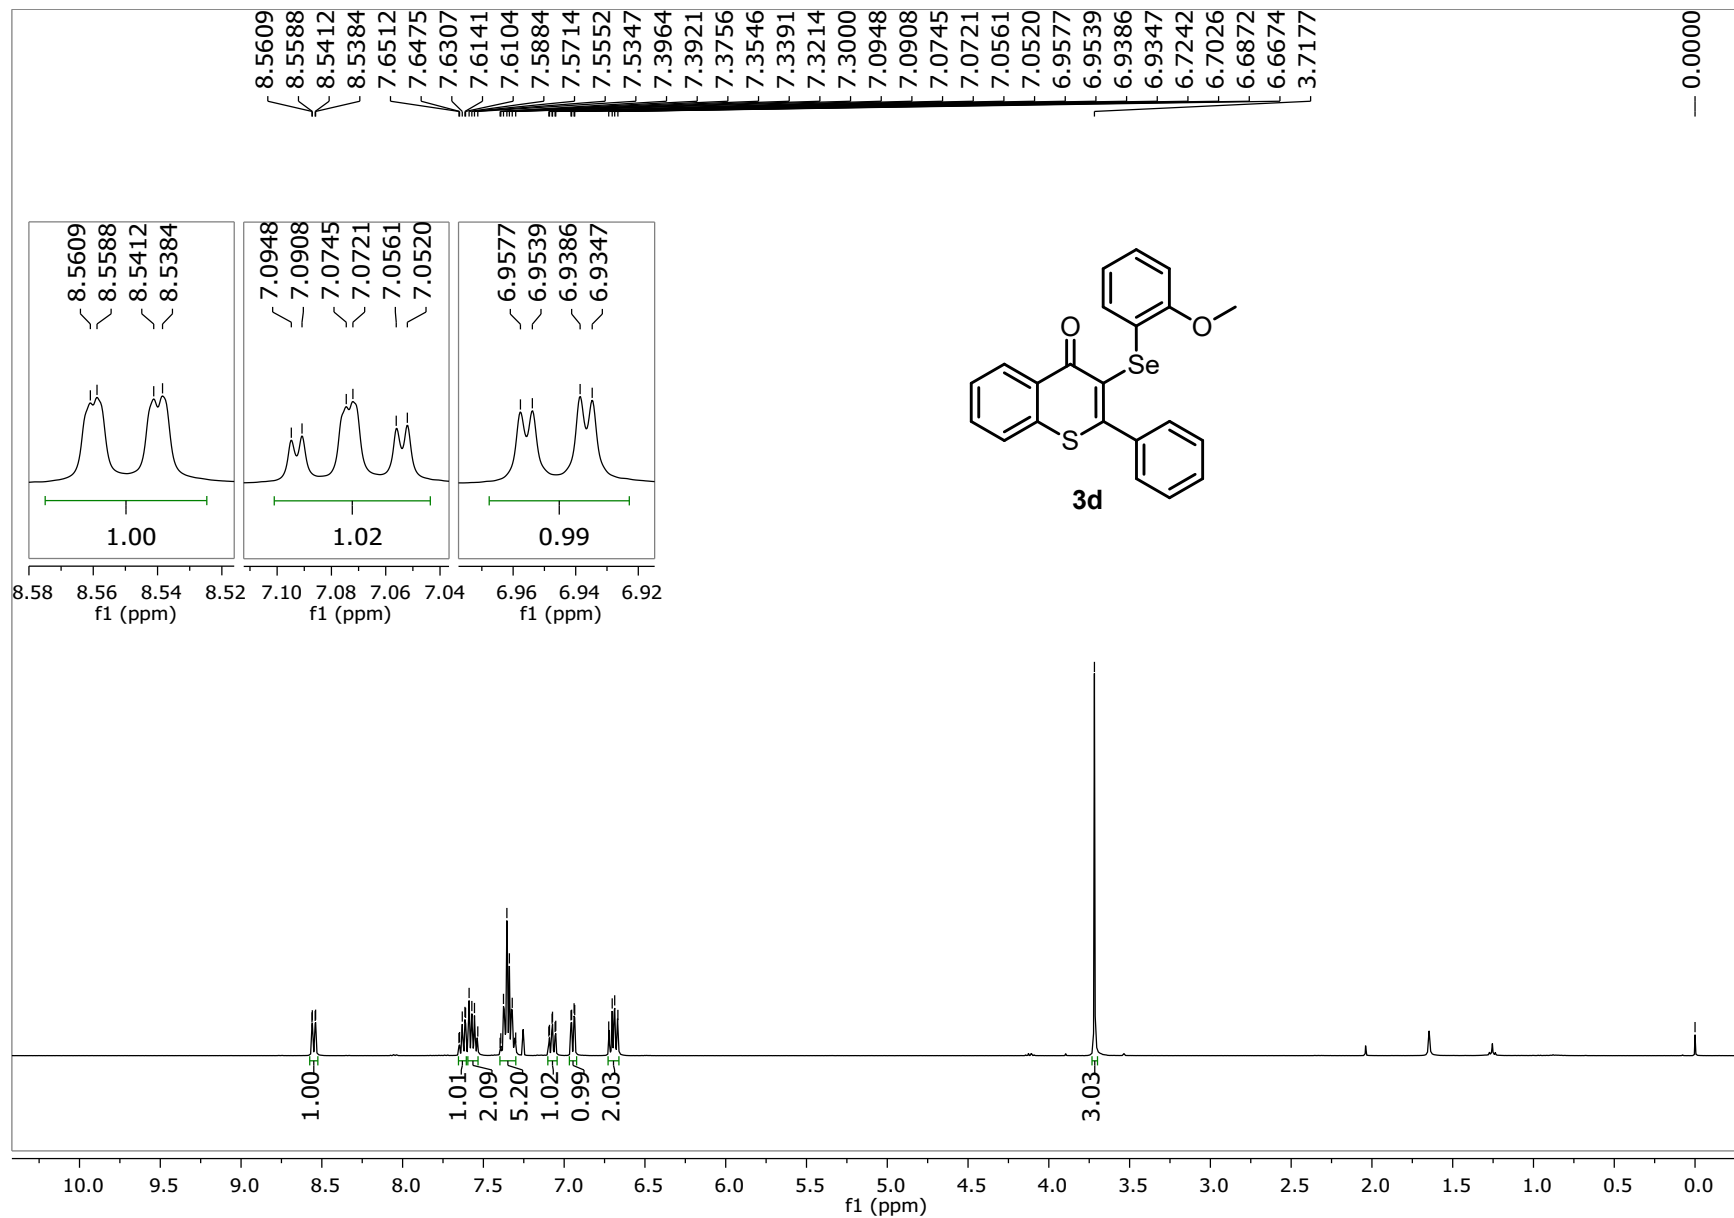

Figure S22: <sup>1</sup>H NMR (400 MHz, CDCl<sub>3</sub>) spectrum of compound **3d**.

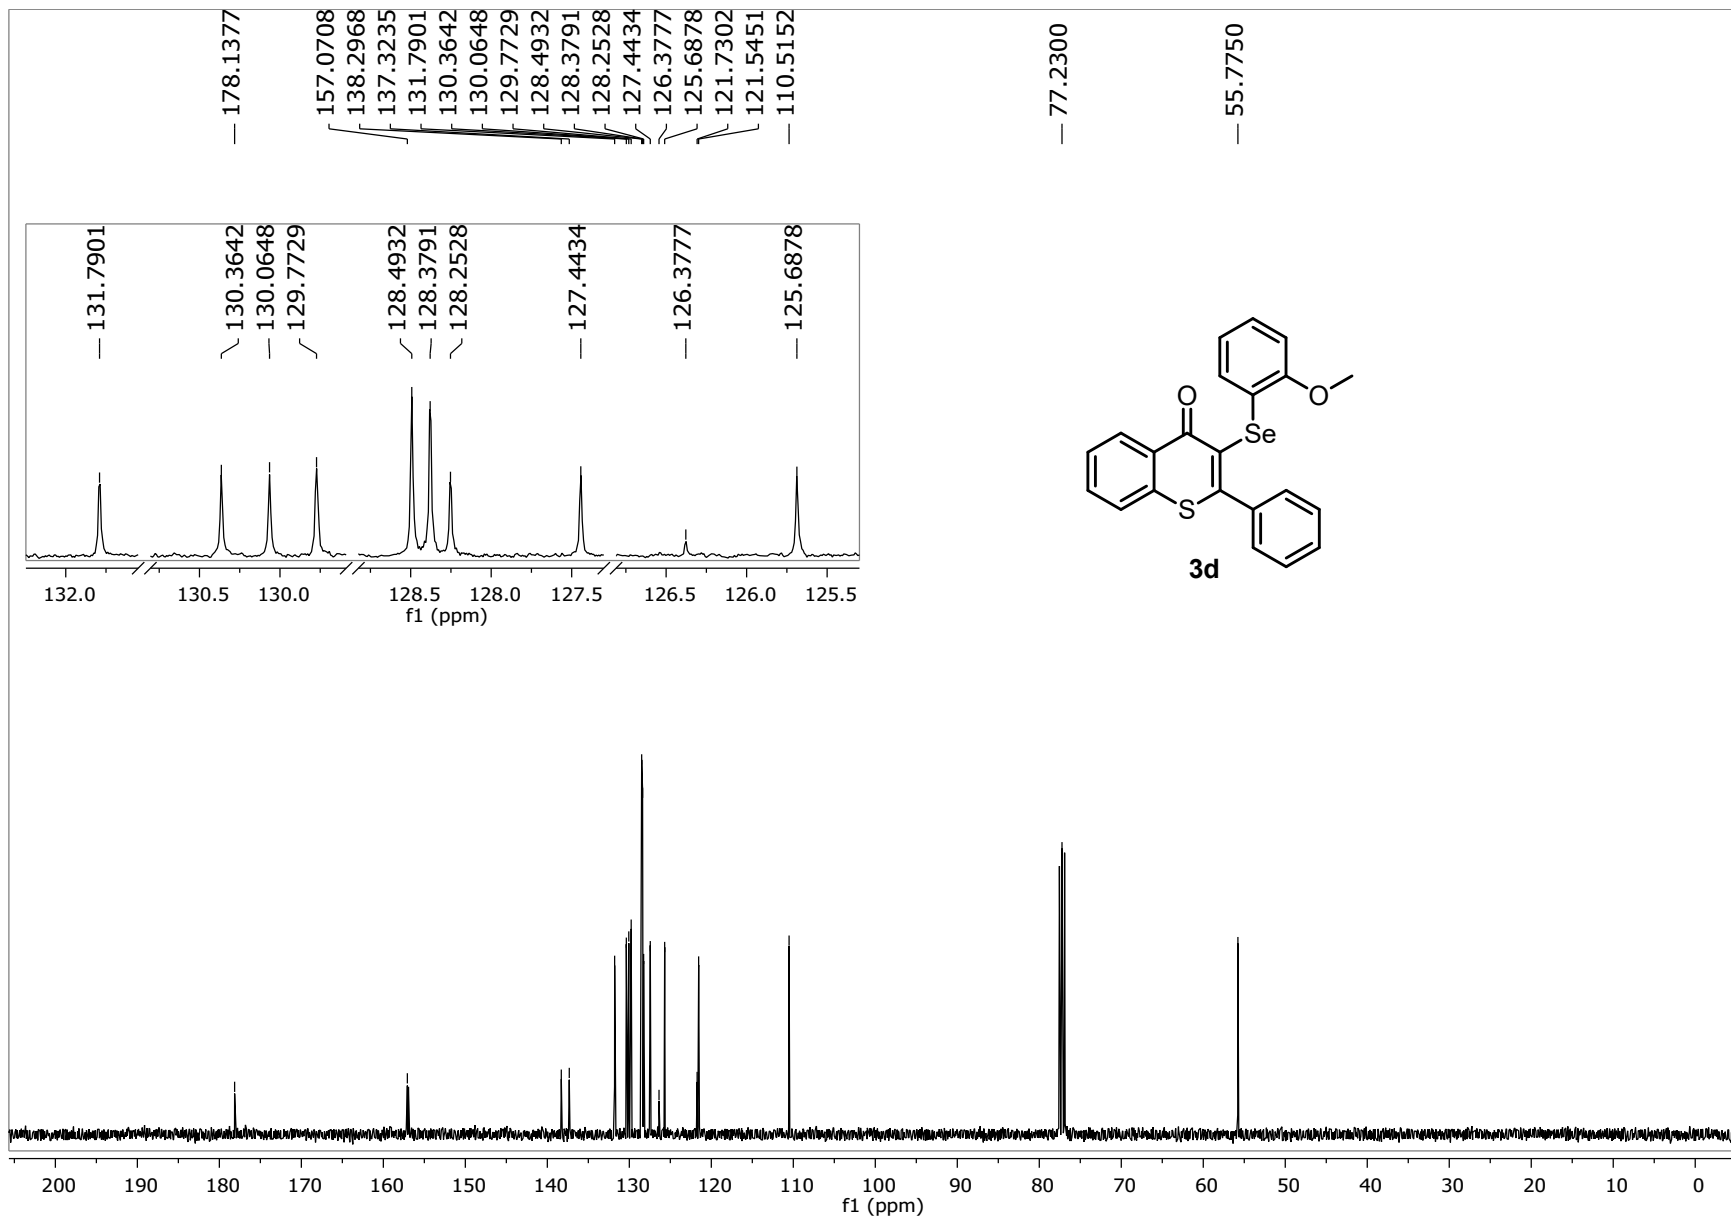

Figure S23:  $^{13}\text{C}\{^1\text{H}\}$  NMR (100 MHz,  $\text{CDCl}_3$ ) spectrum of compound **3d**.



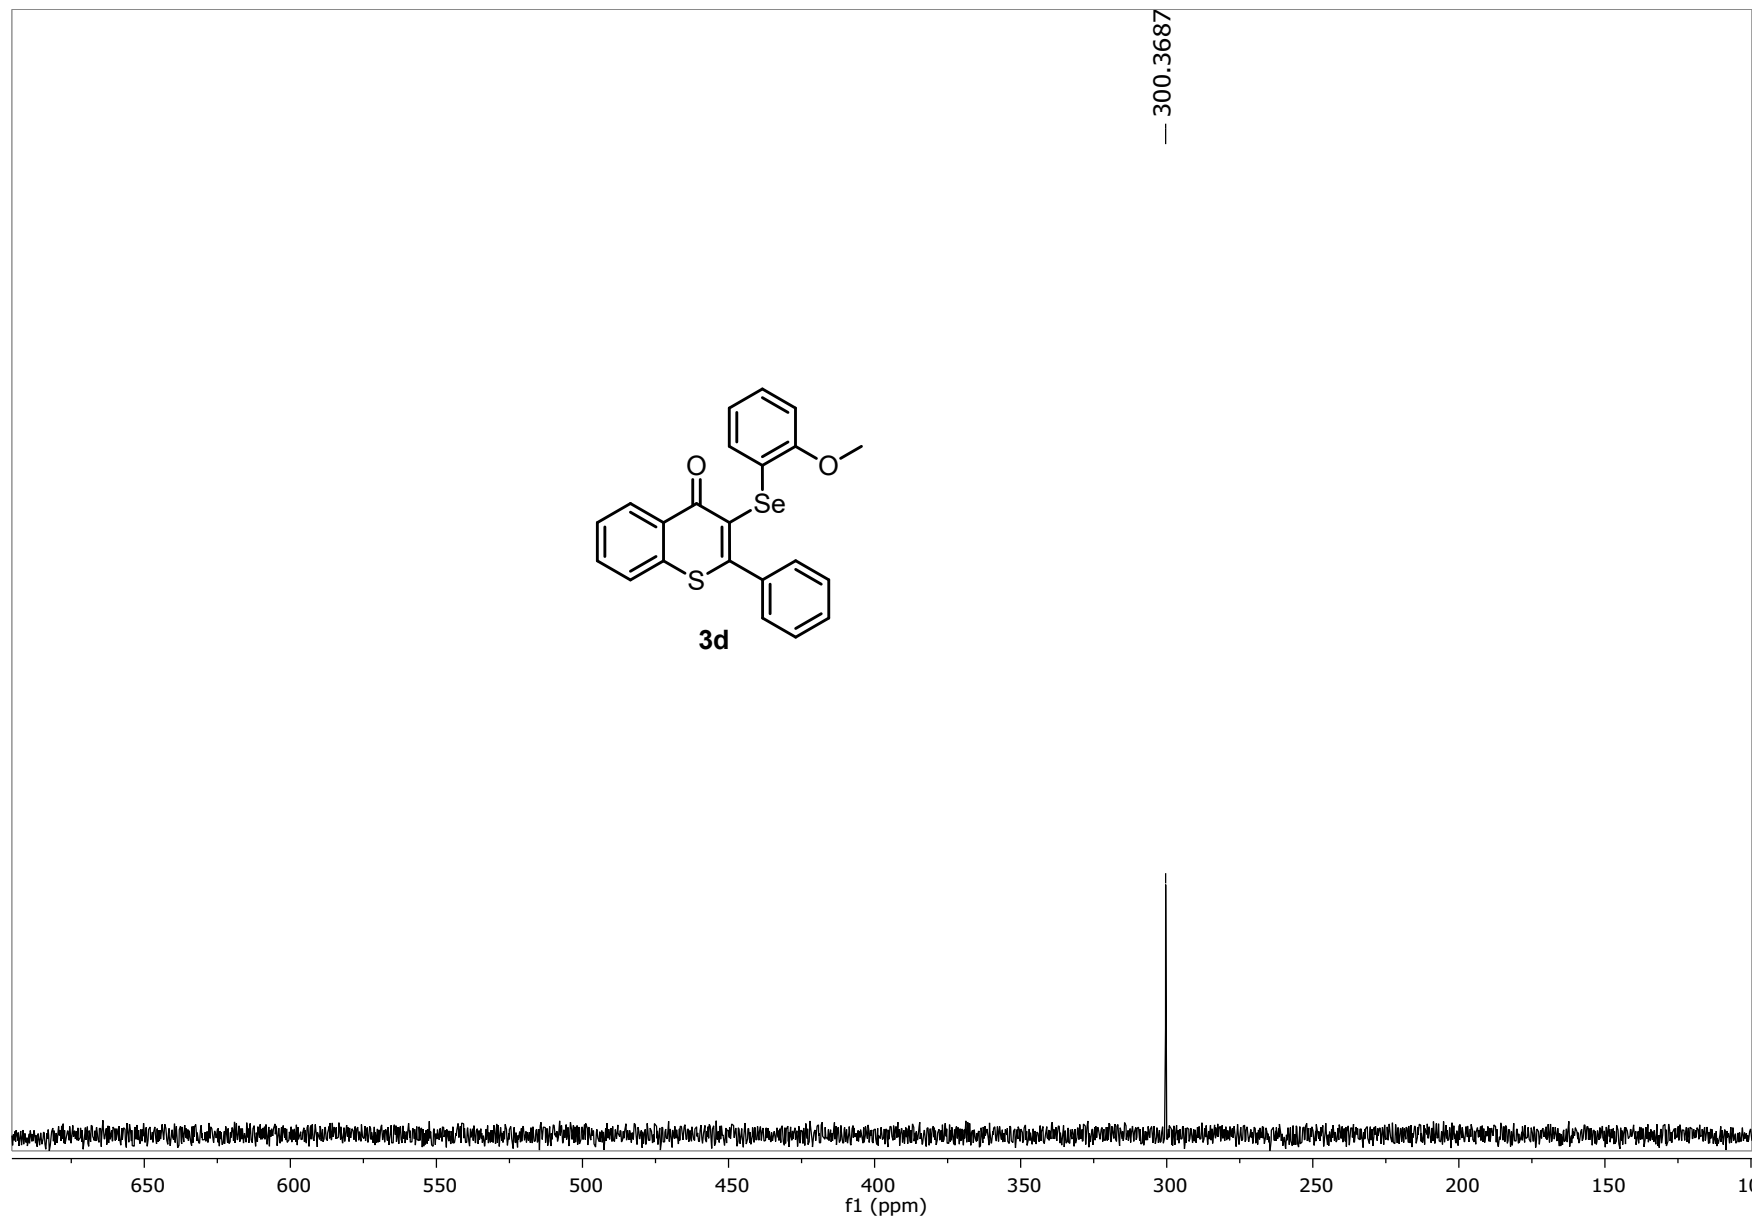

Figure S24:  $^{77}\text{Se}\{^1\text{H}\}$  NMR (76 MHz,  $\text{CDCl}_3$ ) spectrum of compound **3d**.

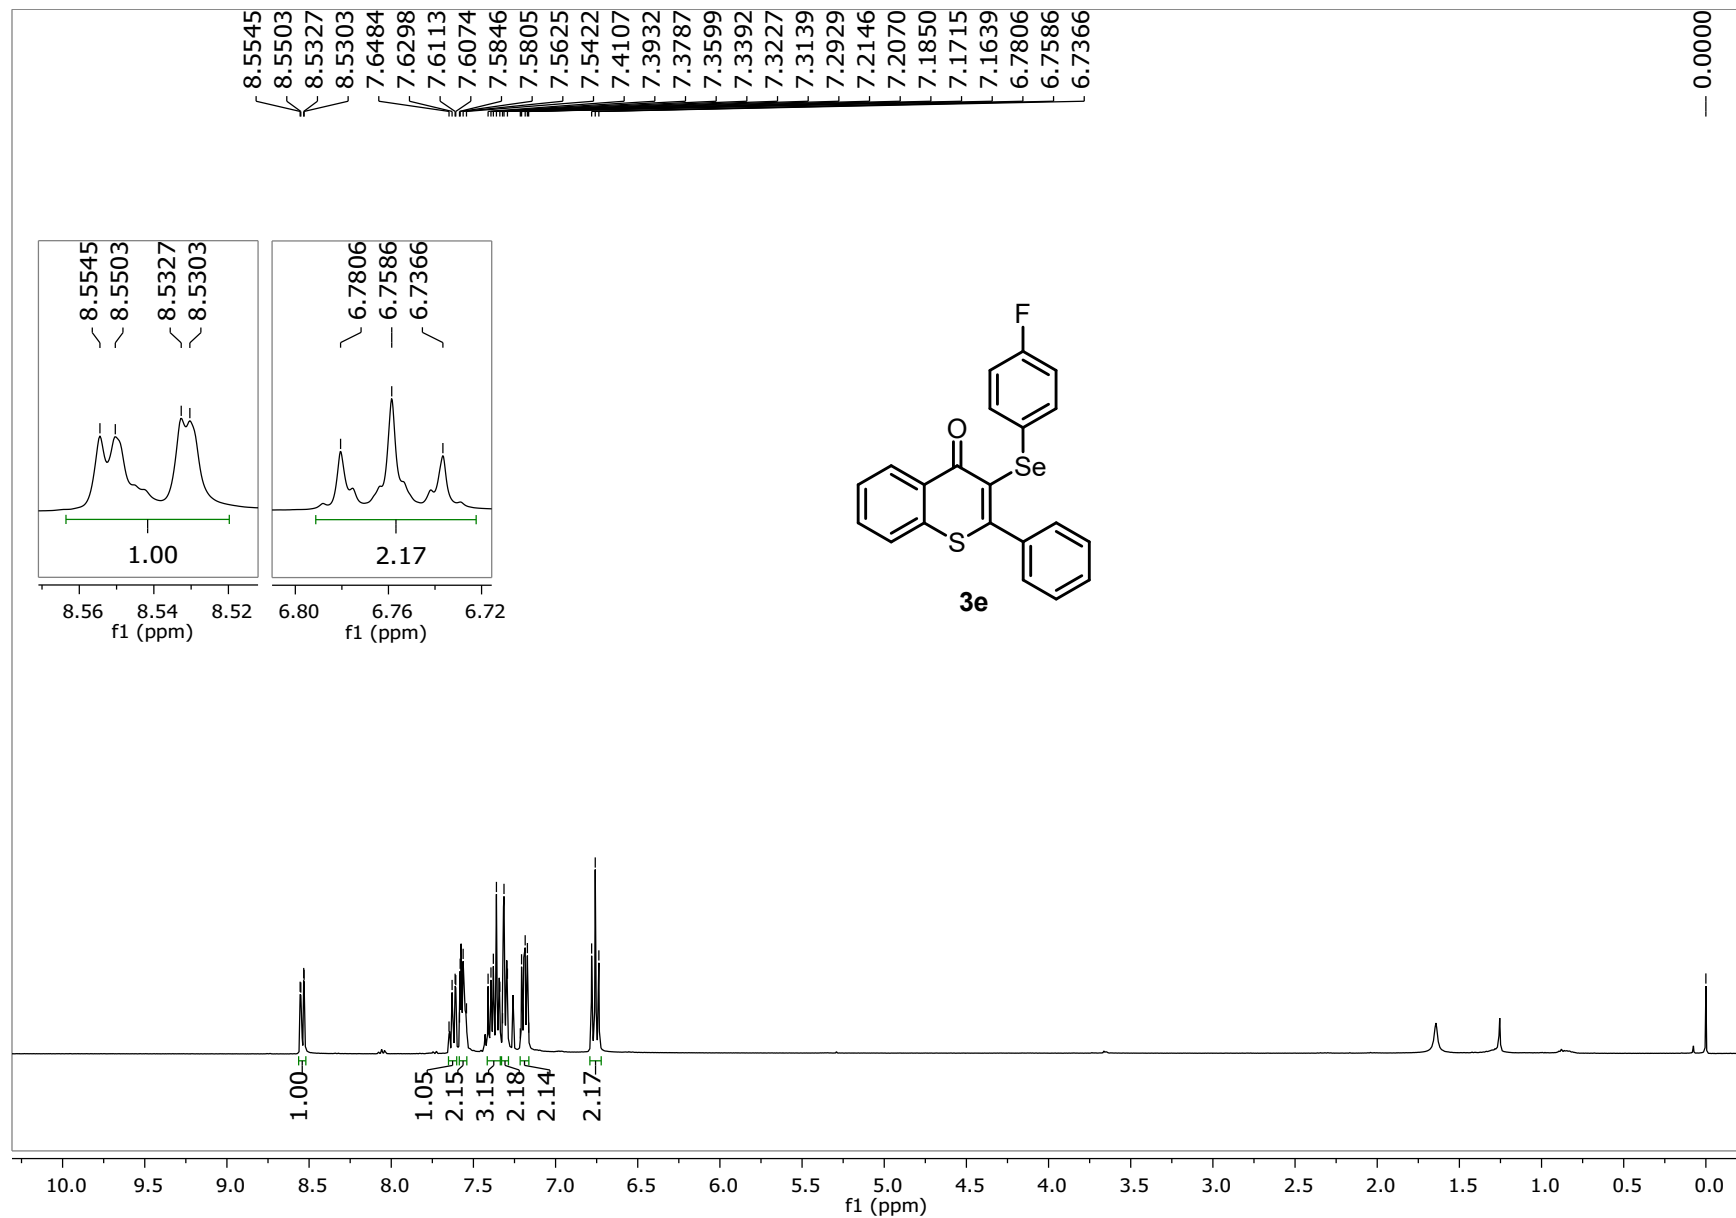

Figure S25: <sup>1</sup>H NMR (400 MHz, CDCl<sub>3</sub>) spectrum of compound **3e**.

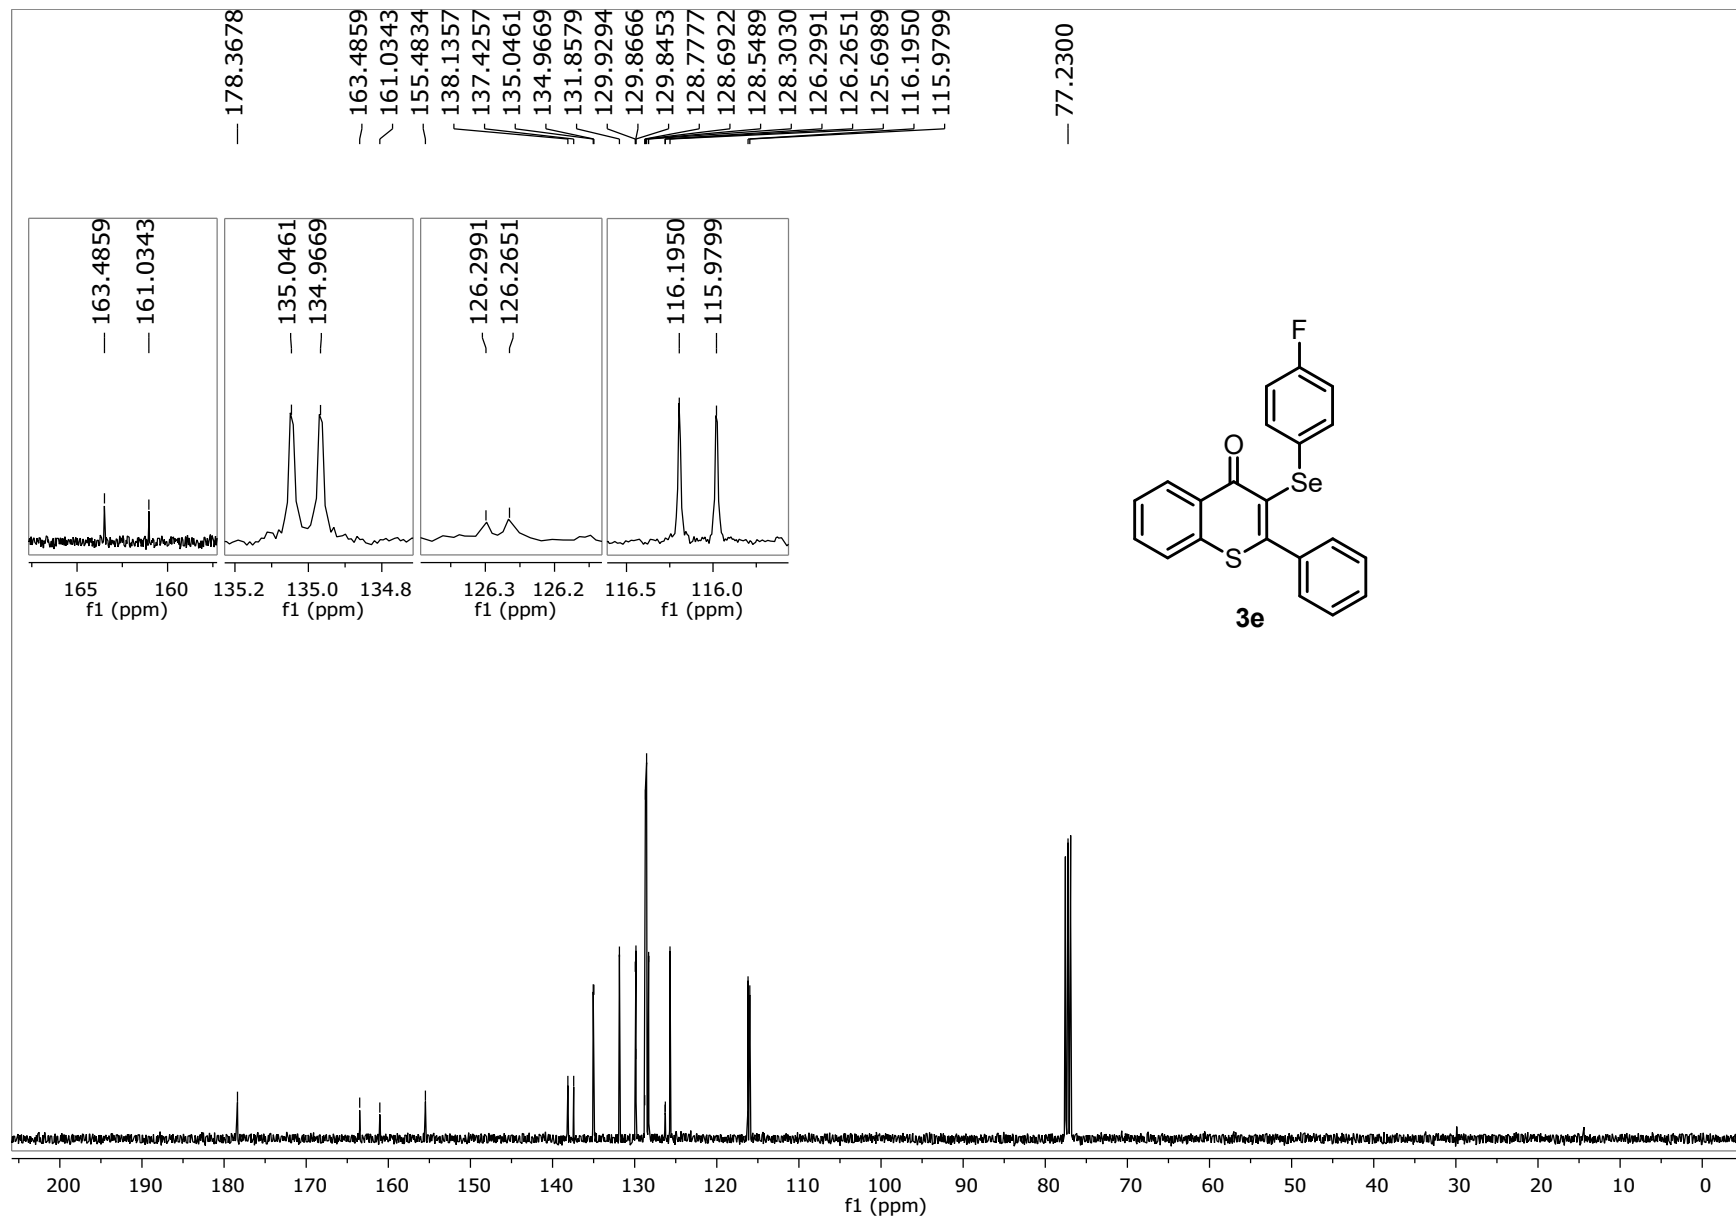

Figure S26:  $^{13}\text{C}\{^1\text{H}\}$  NMR (100 MHz,  $\text{CDCl}_3$ ) spectrum of compound **3e**.

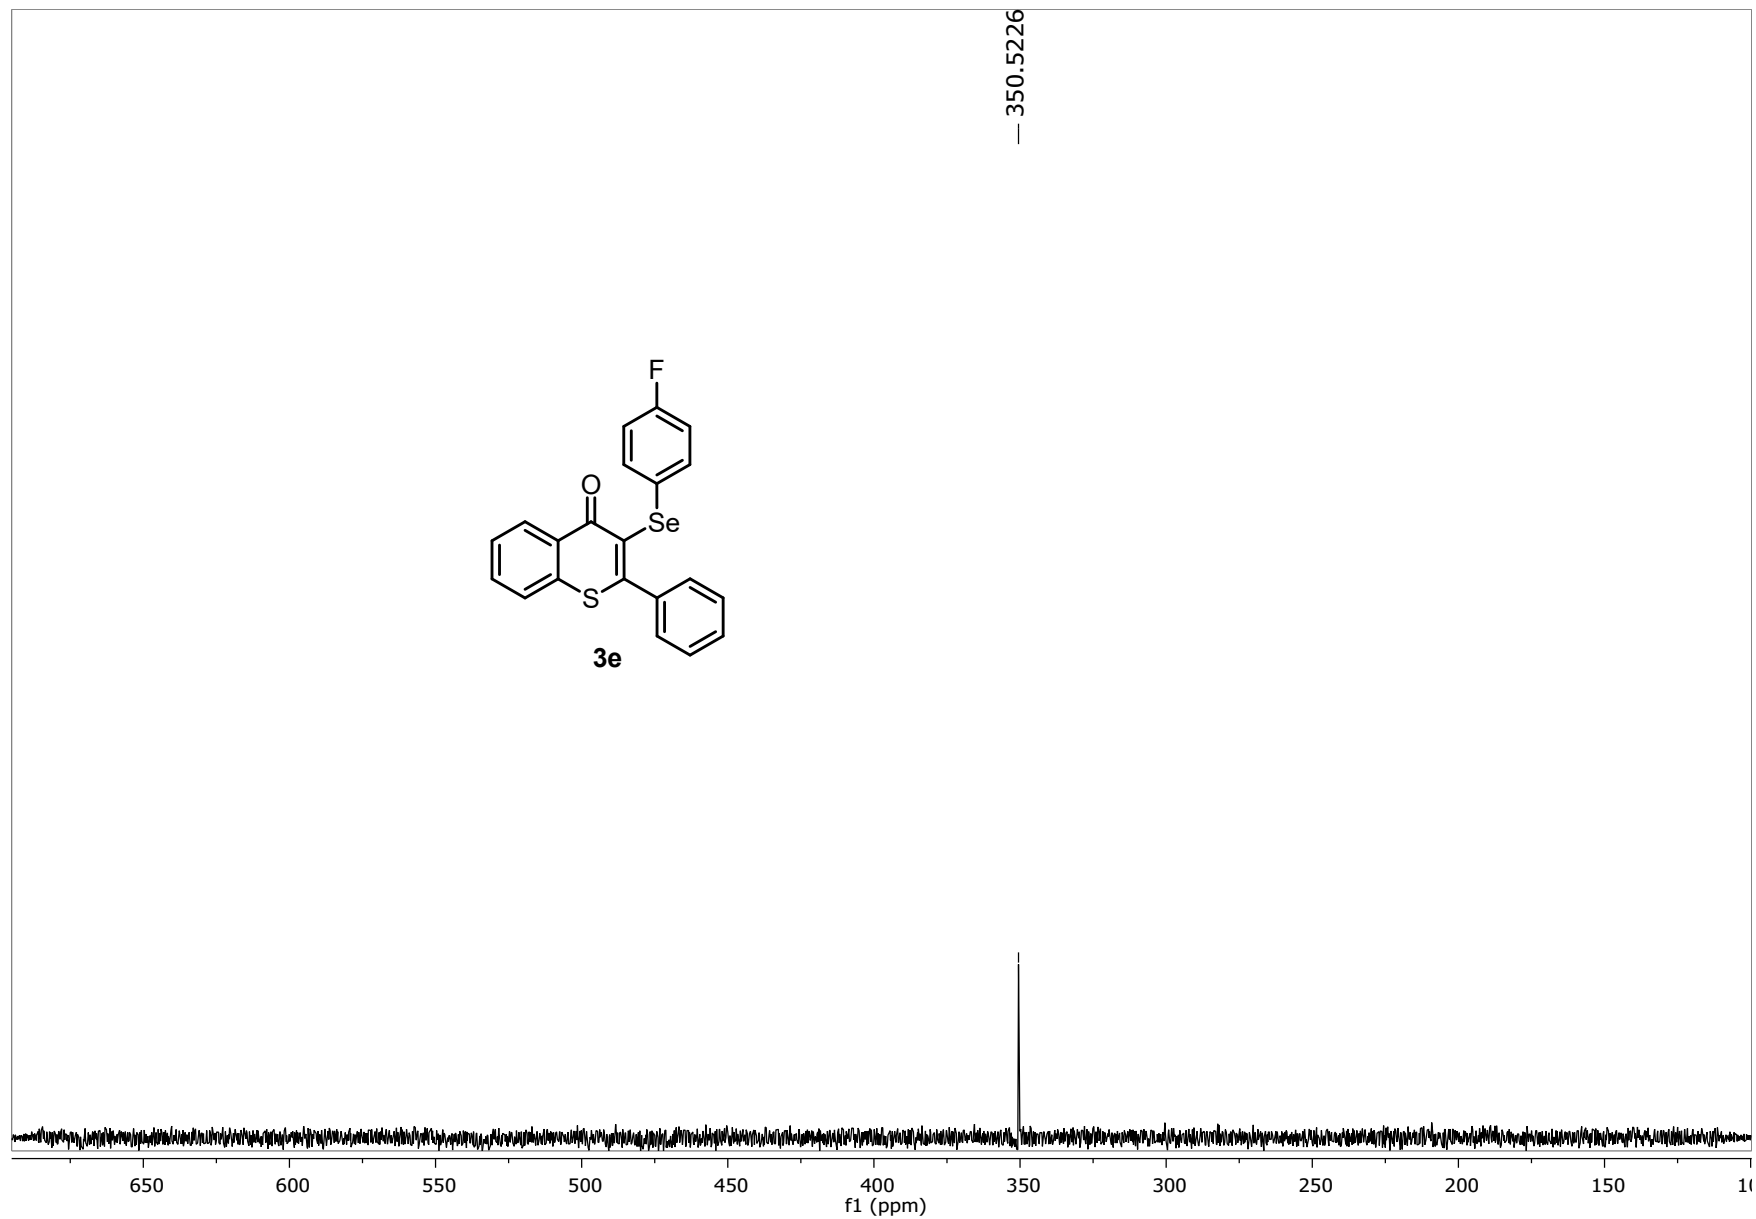

Figure S27:  $^{77}\text{Se}\{^1\text{H}\}$  NMR (76 MHz,  $\text{CDCl}_3$ ) spectrum of compound **3e**.

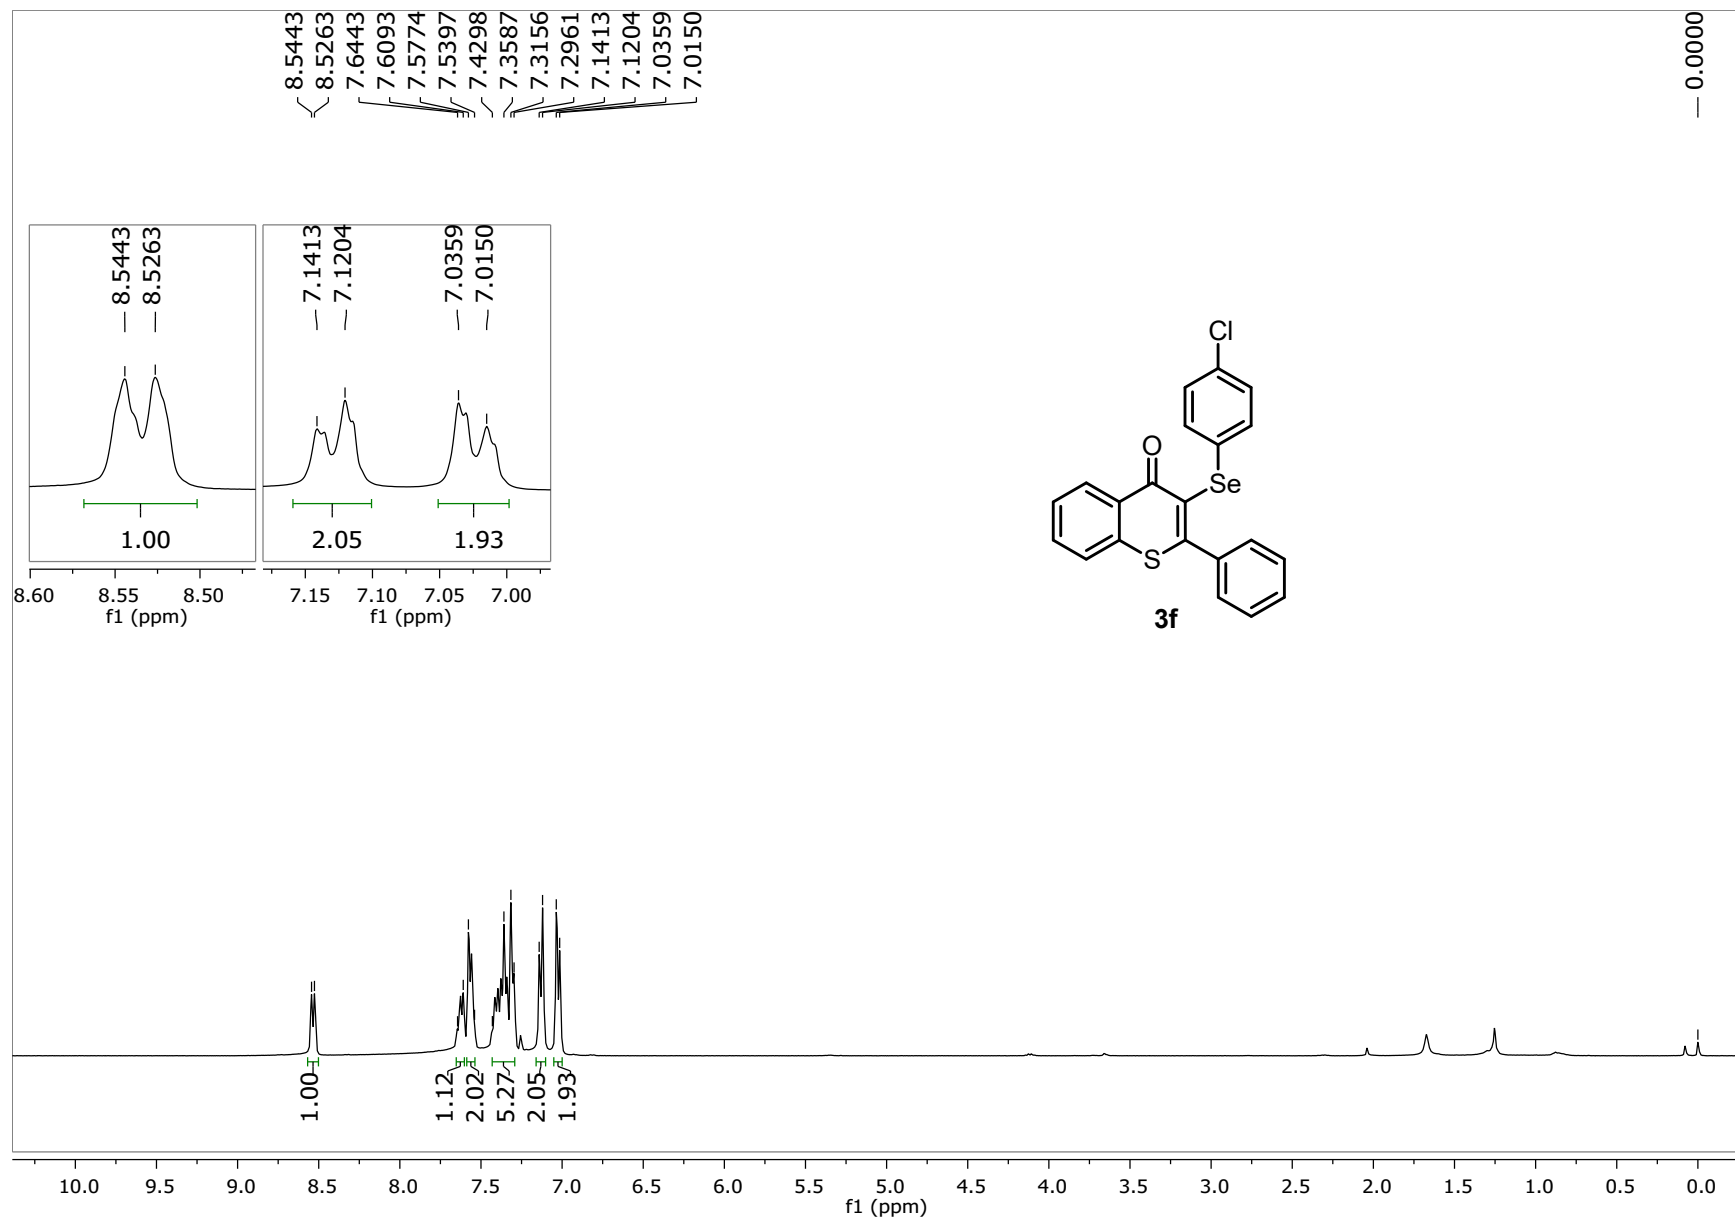

Figure S28: <sup>1</sup>H NMR (400 MHz, CDCl<sub>3</sub>) spectrum of compound **3f**.

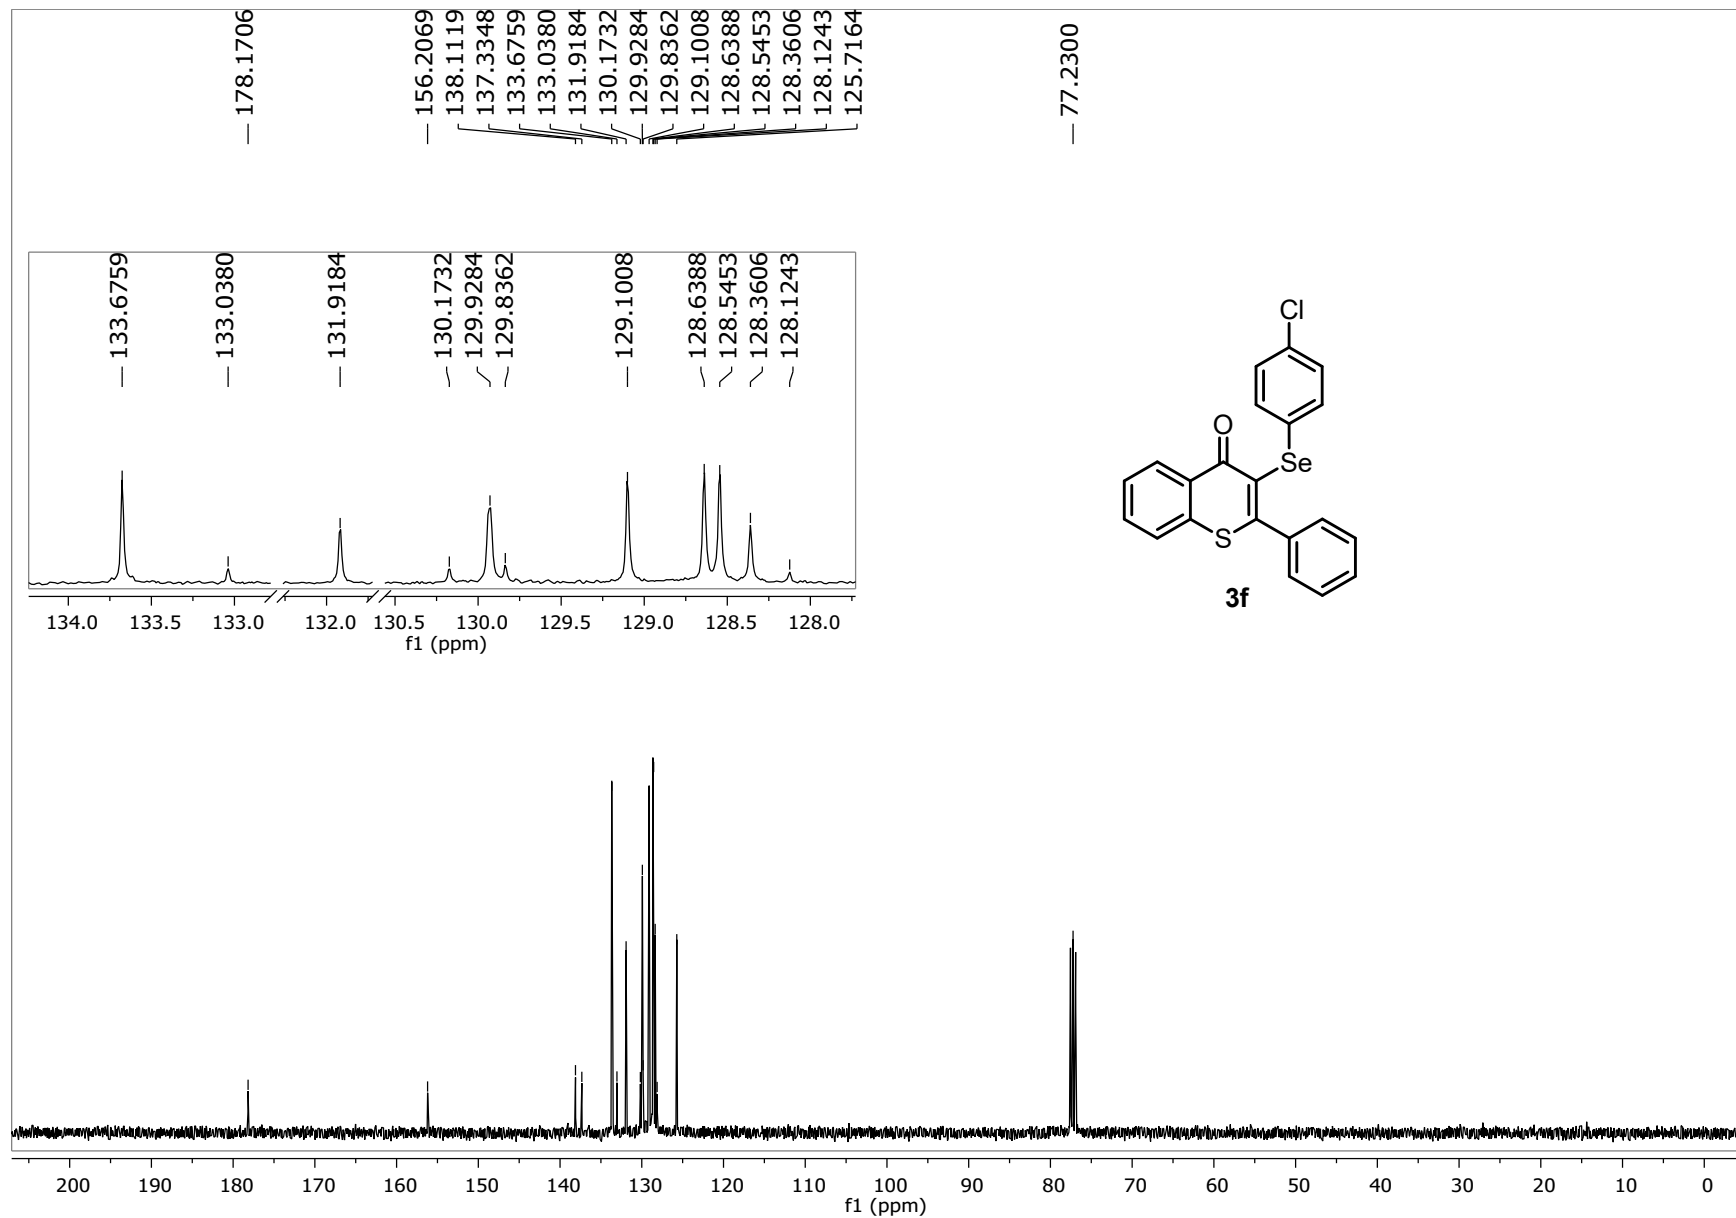

Figure S29:  $^{13}\text{C}\{^1\text{H}\}$  NMR (100 MHz,  $\text{CDCl}_3$ ) spectrum of compound **3f**.

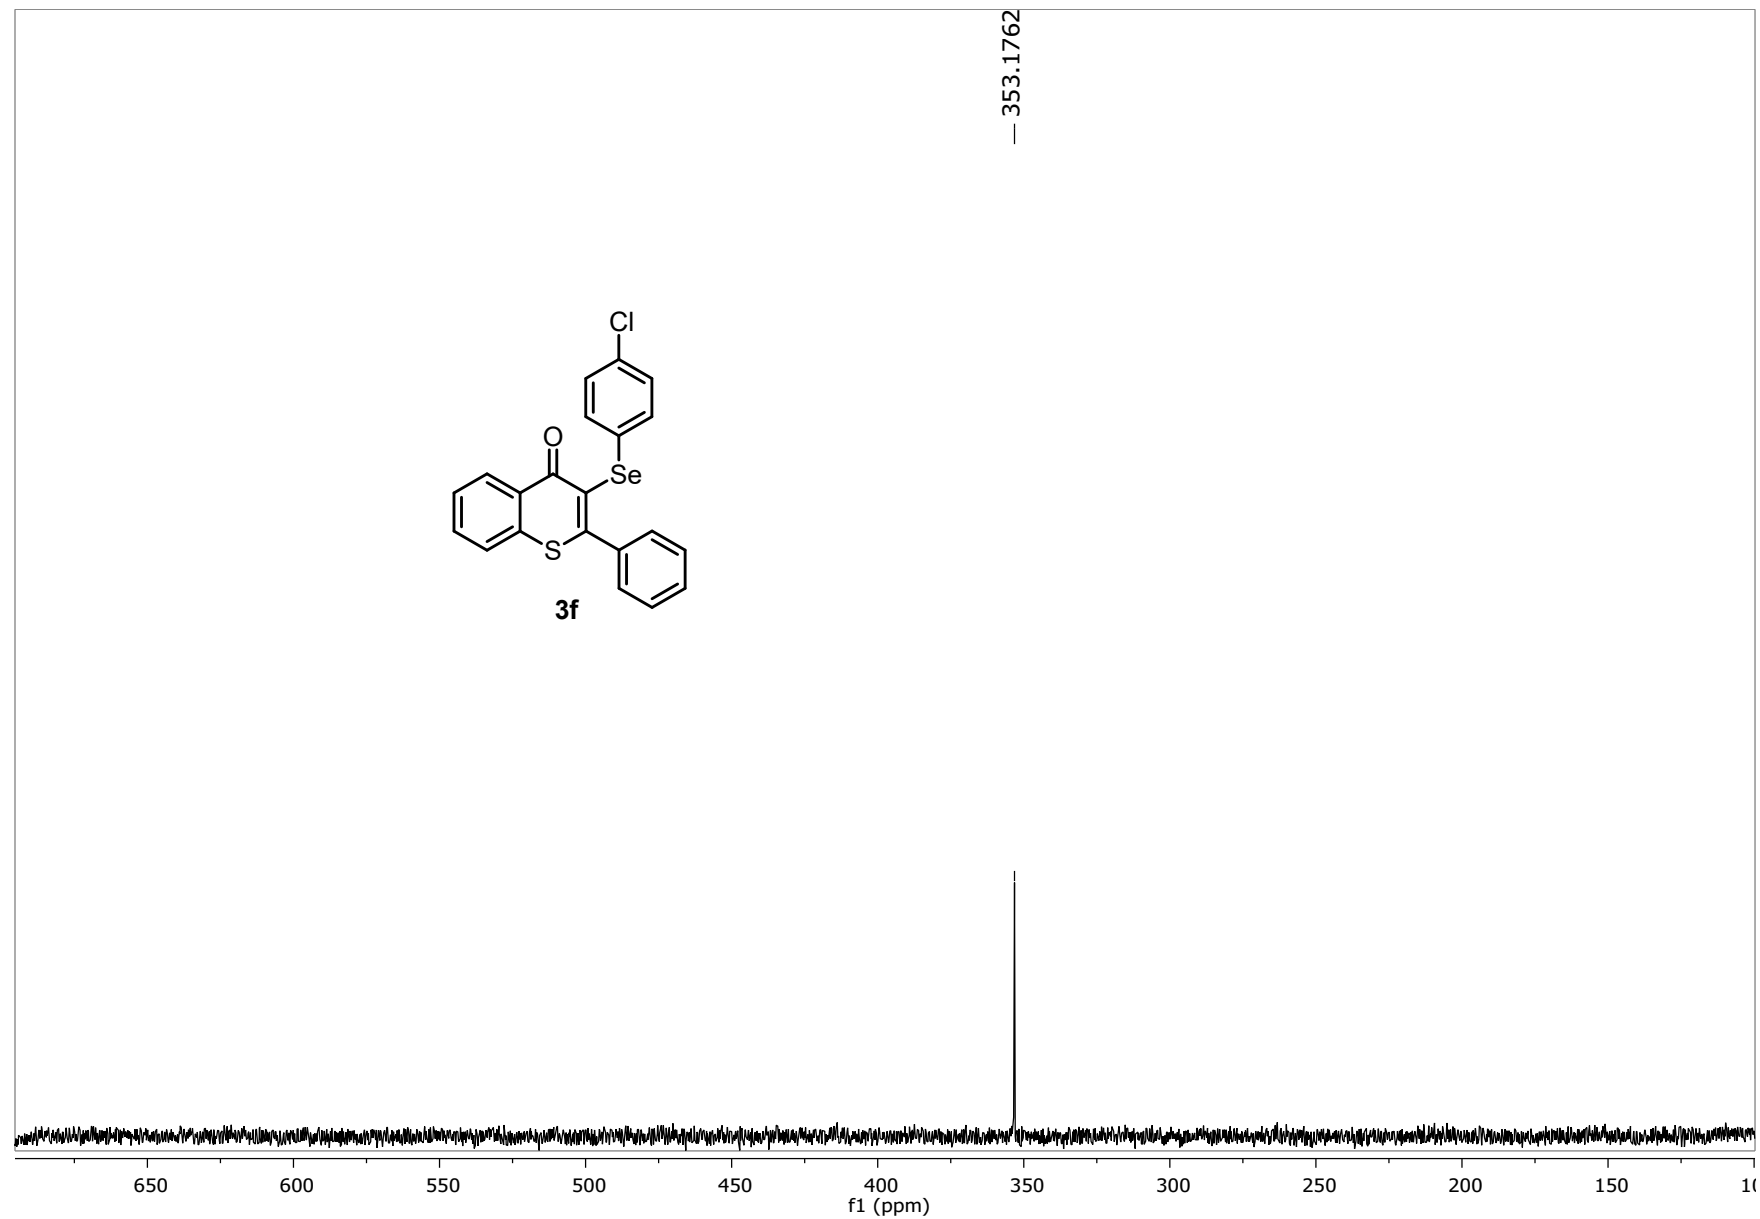

Figure S30:  $^{77}\text{Se}\{^1\text{H}\}$  NMR (76 MHz,  $\text{CDCl}_3$ ) spectrum of compound **3f**.

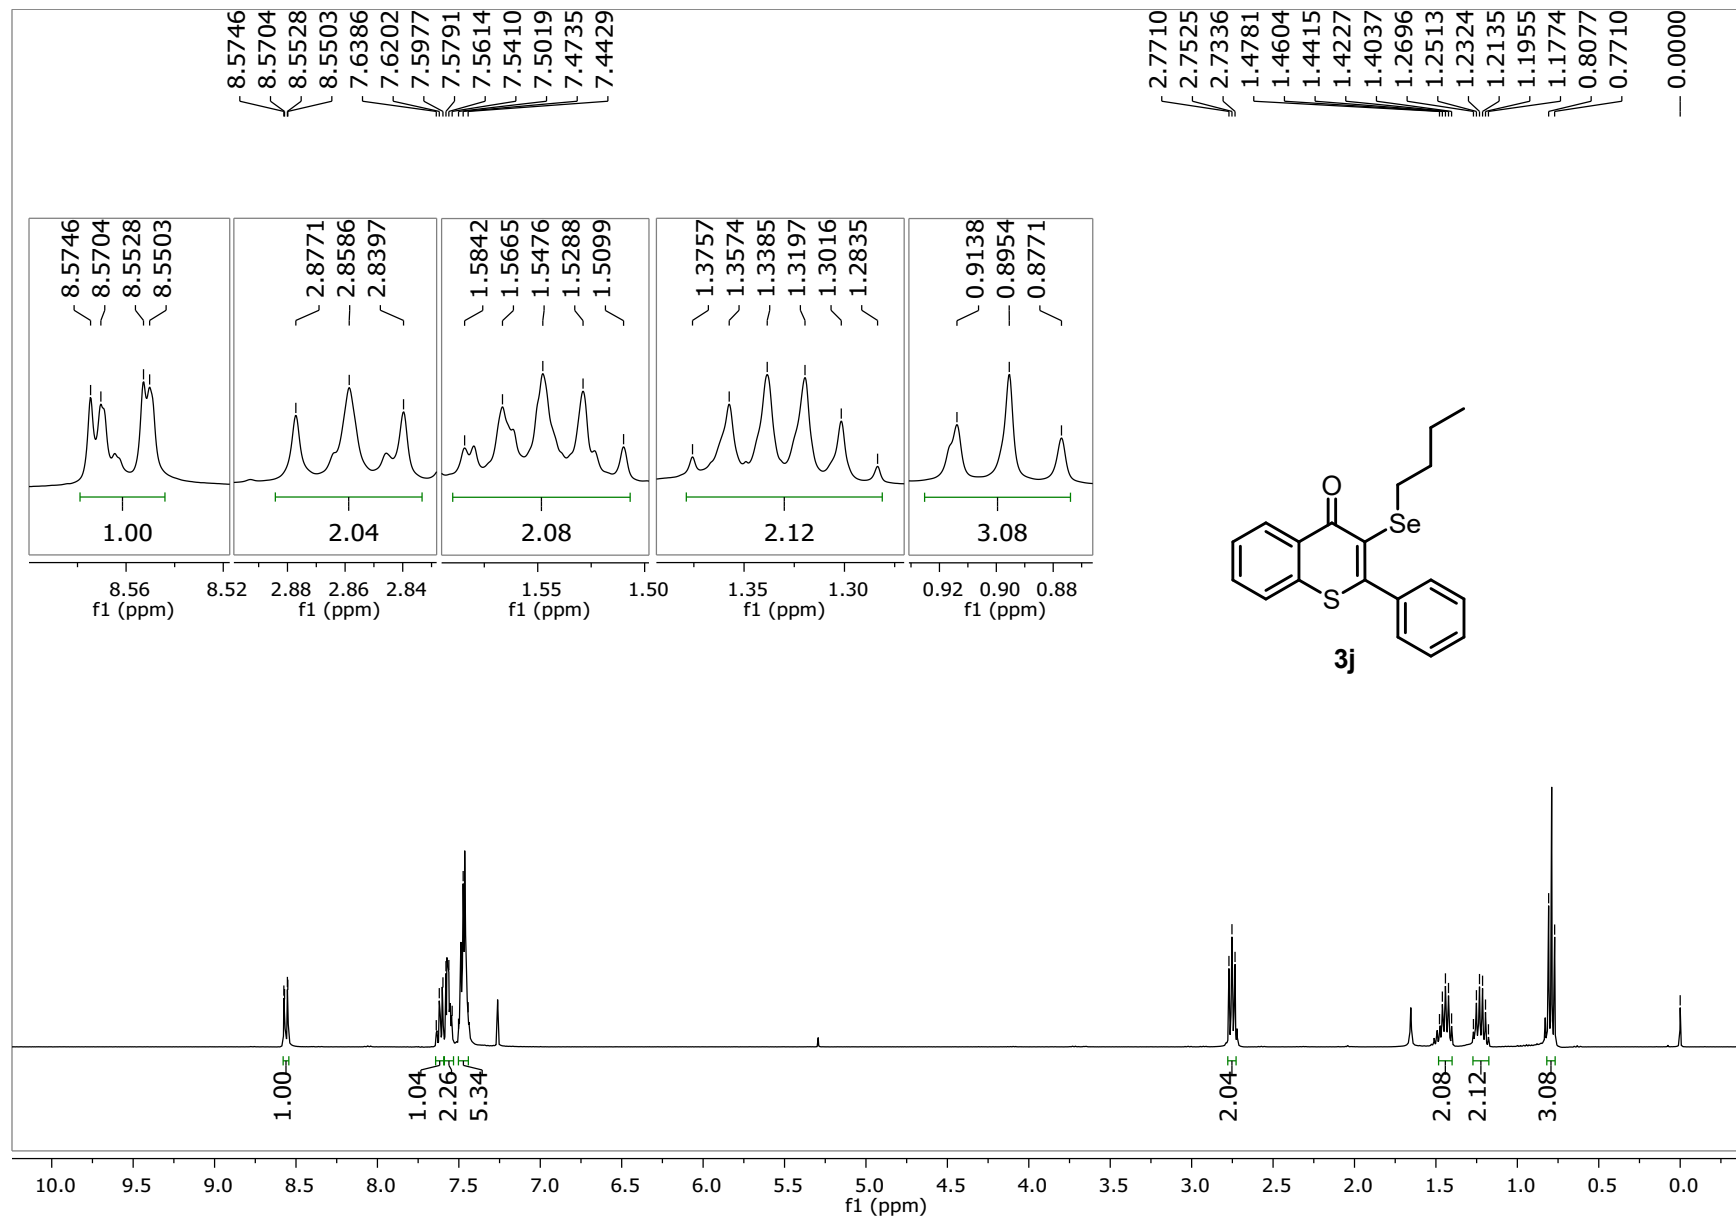

Figure S31:  $^1\text{H}$  NMR (400 MHz,  $\text{CDCl}_3$ ) spectrum of compound **3j**.



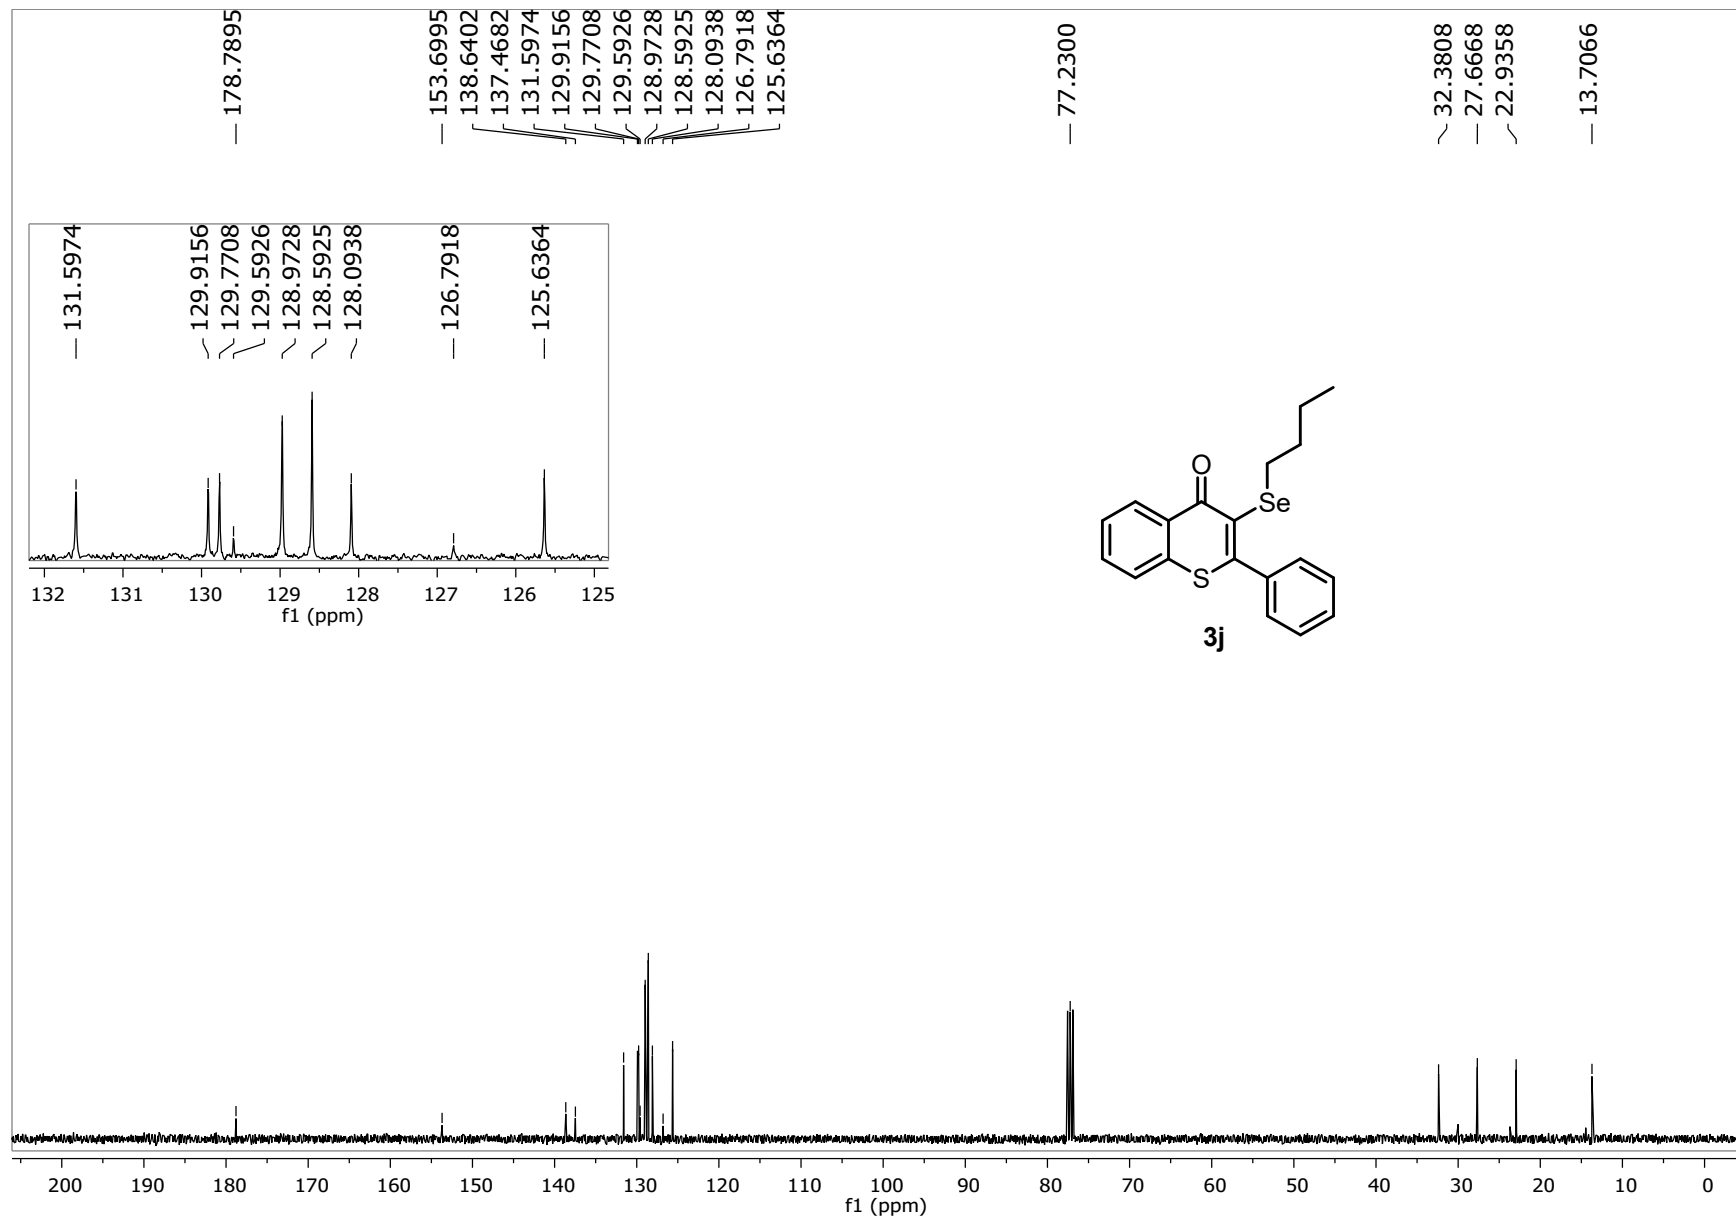

**Figure S32:**  $^{13}\text{C}\{^1\text{H}\}$  NMR (100 MHz,  $\text{CDCl}_3$ ) spectrum of compound **3j**.

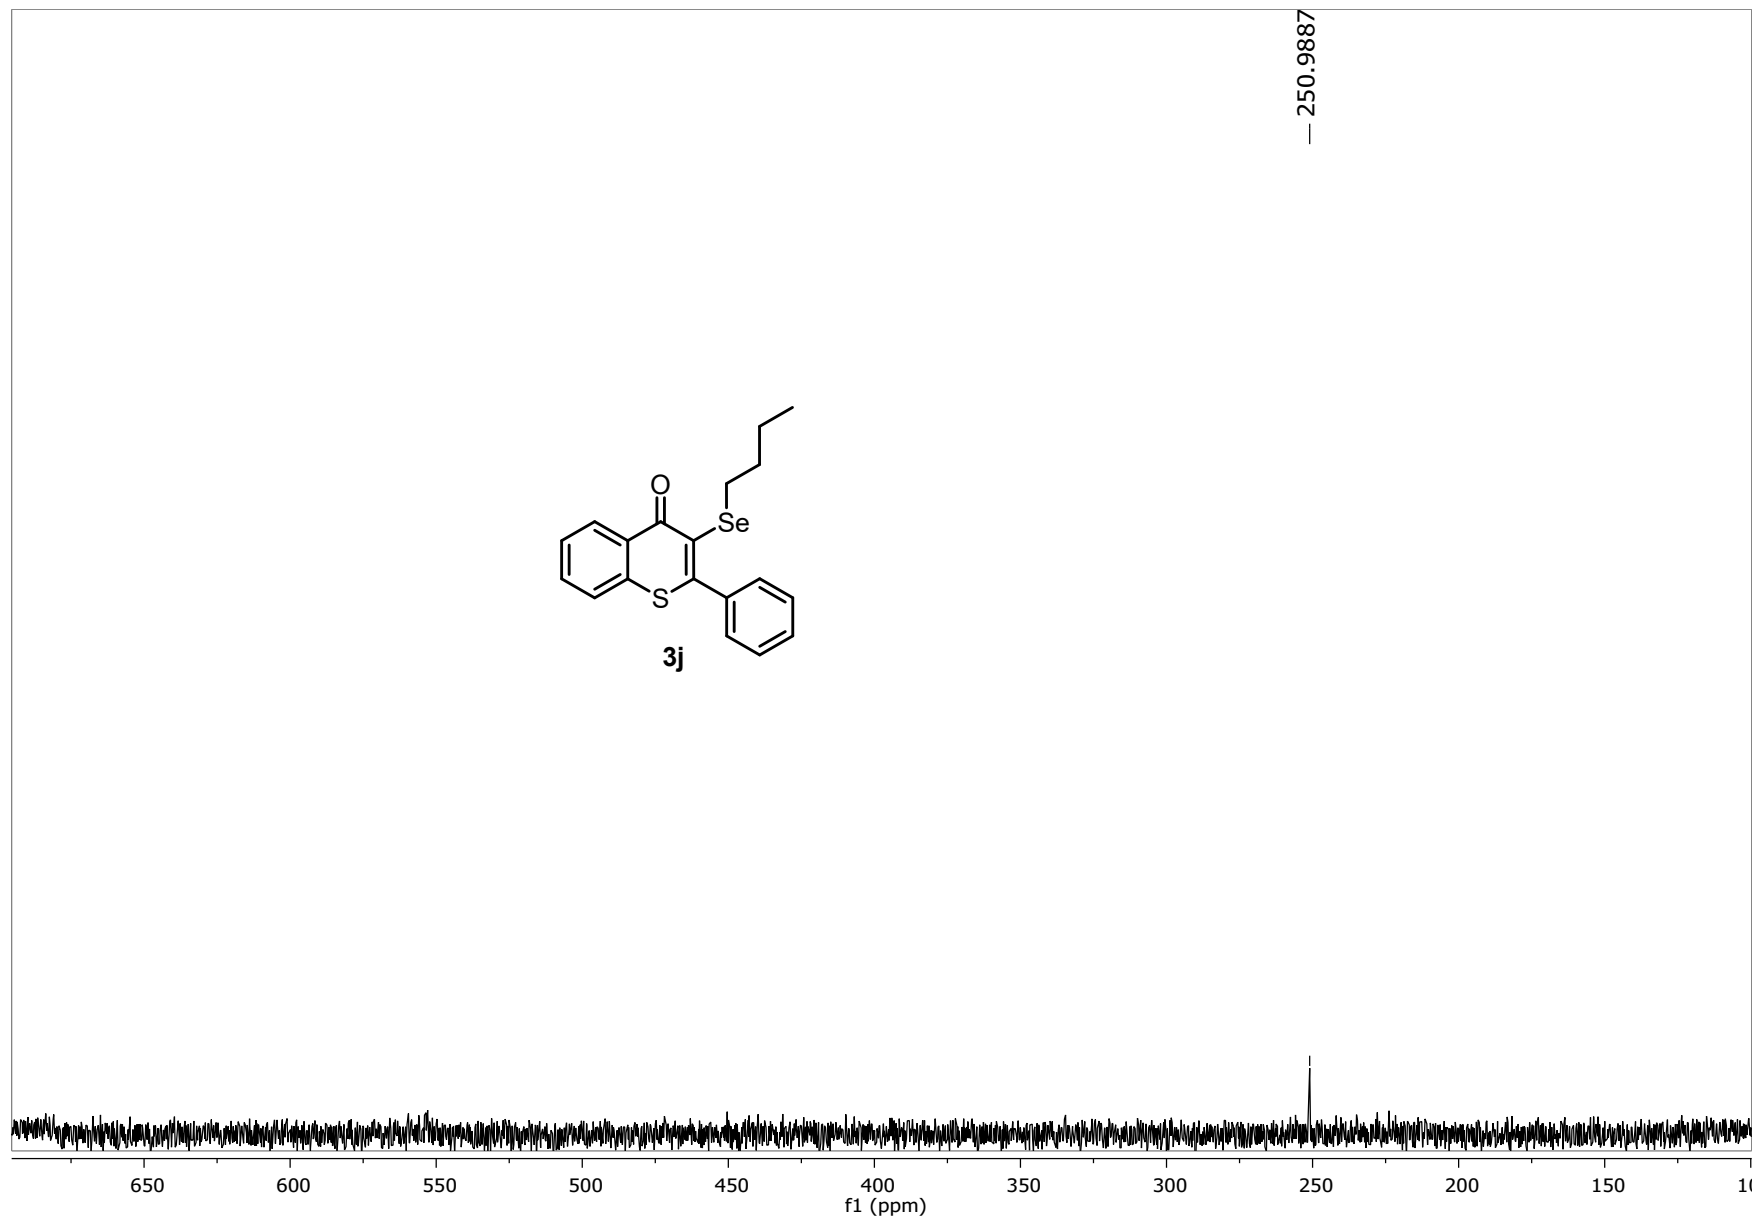

**Figure S33:**  $^{77}\text{Se}\{^1\text{H}\}$  NMR (76 MHz,  $\text{CDCl}_3$ ) spectrum of compound **3j**.

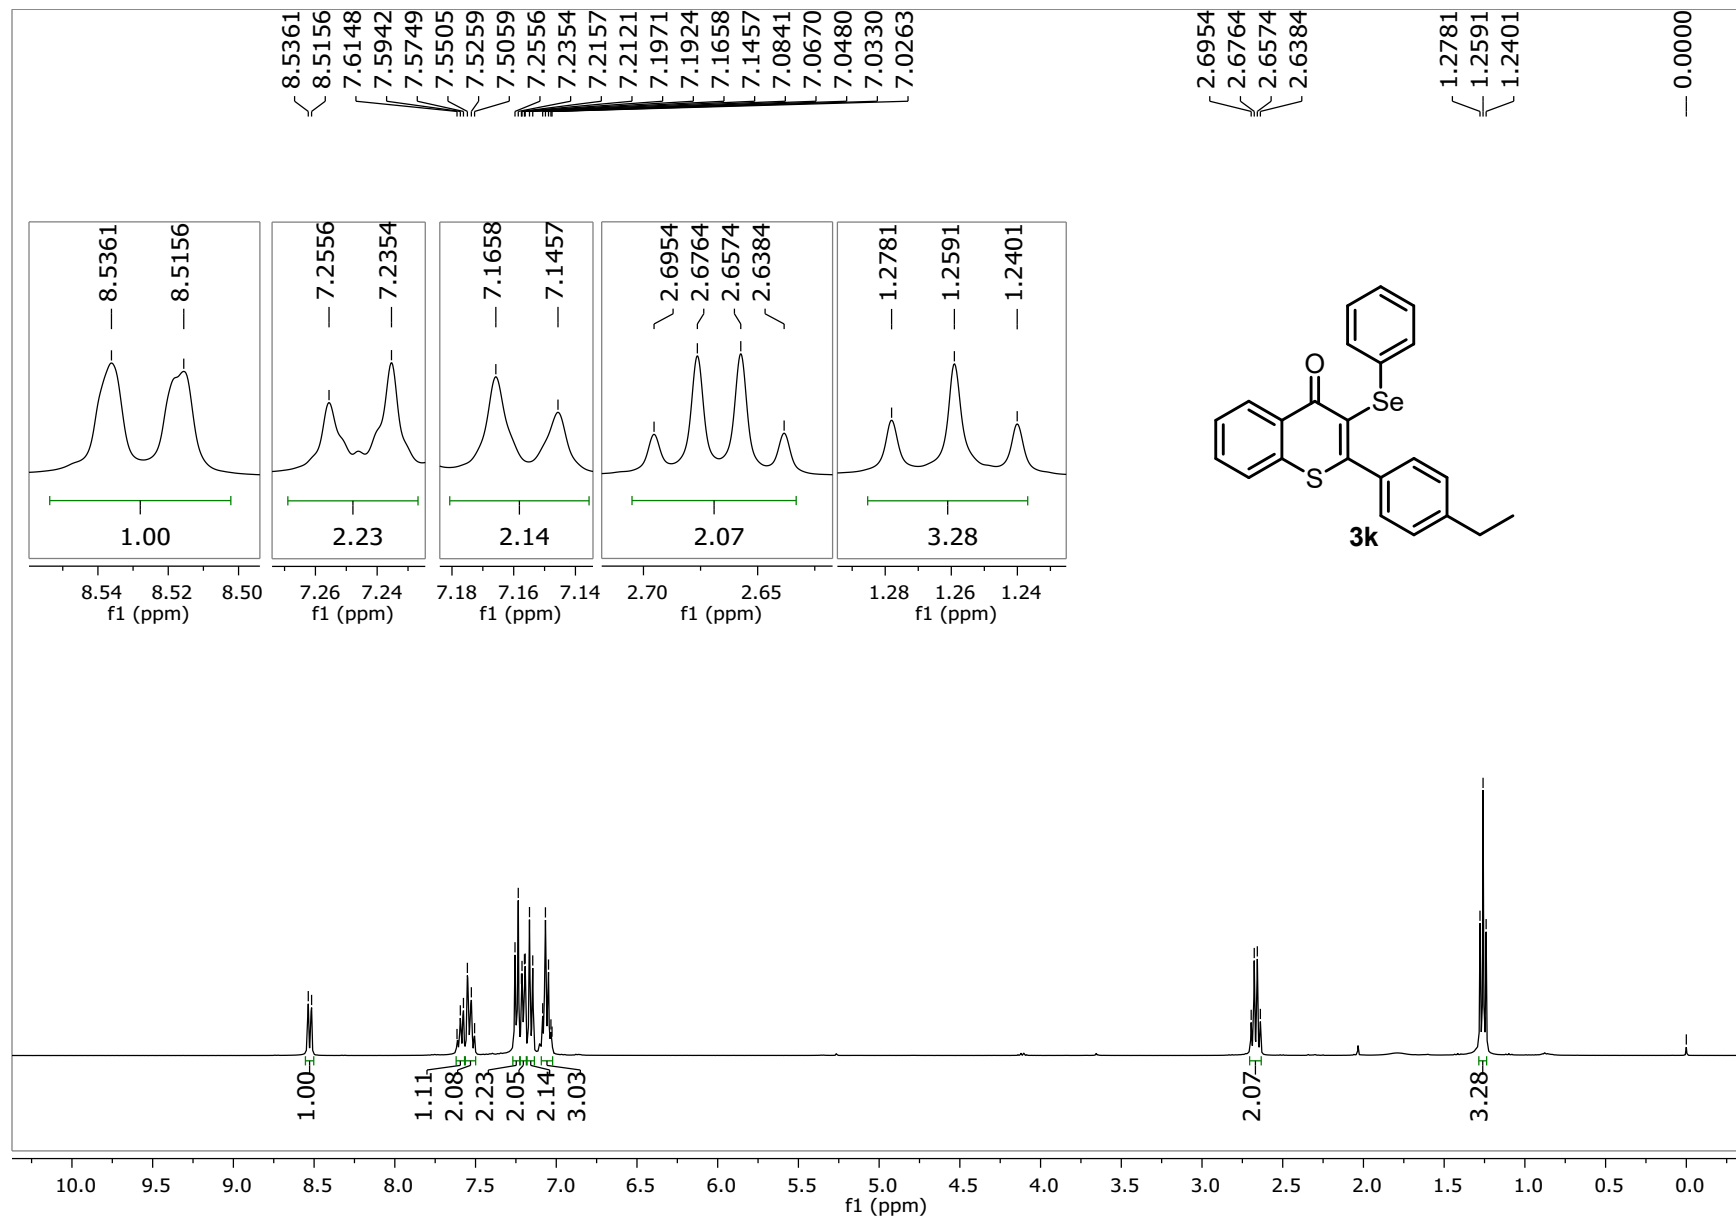

Figure S34: <sup>1</sup>H NMR (400 MHz, CDCl<sub>3</sub>) spectrum of compound **3k**.

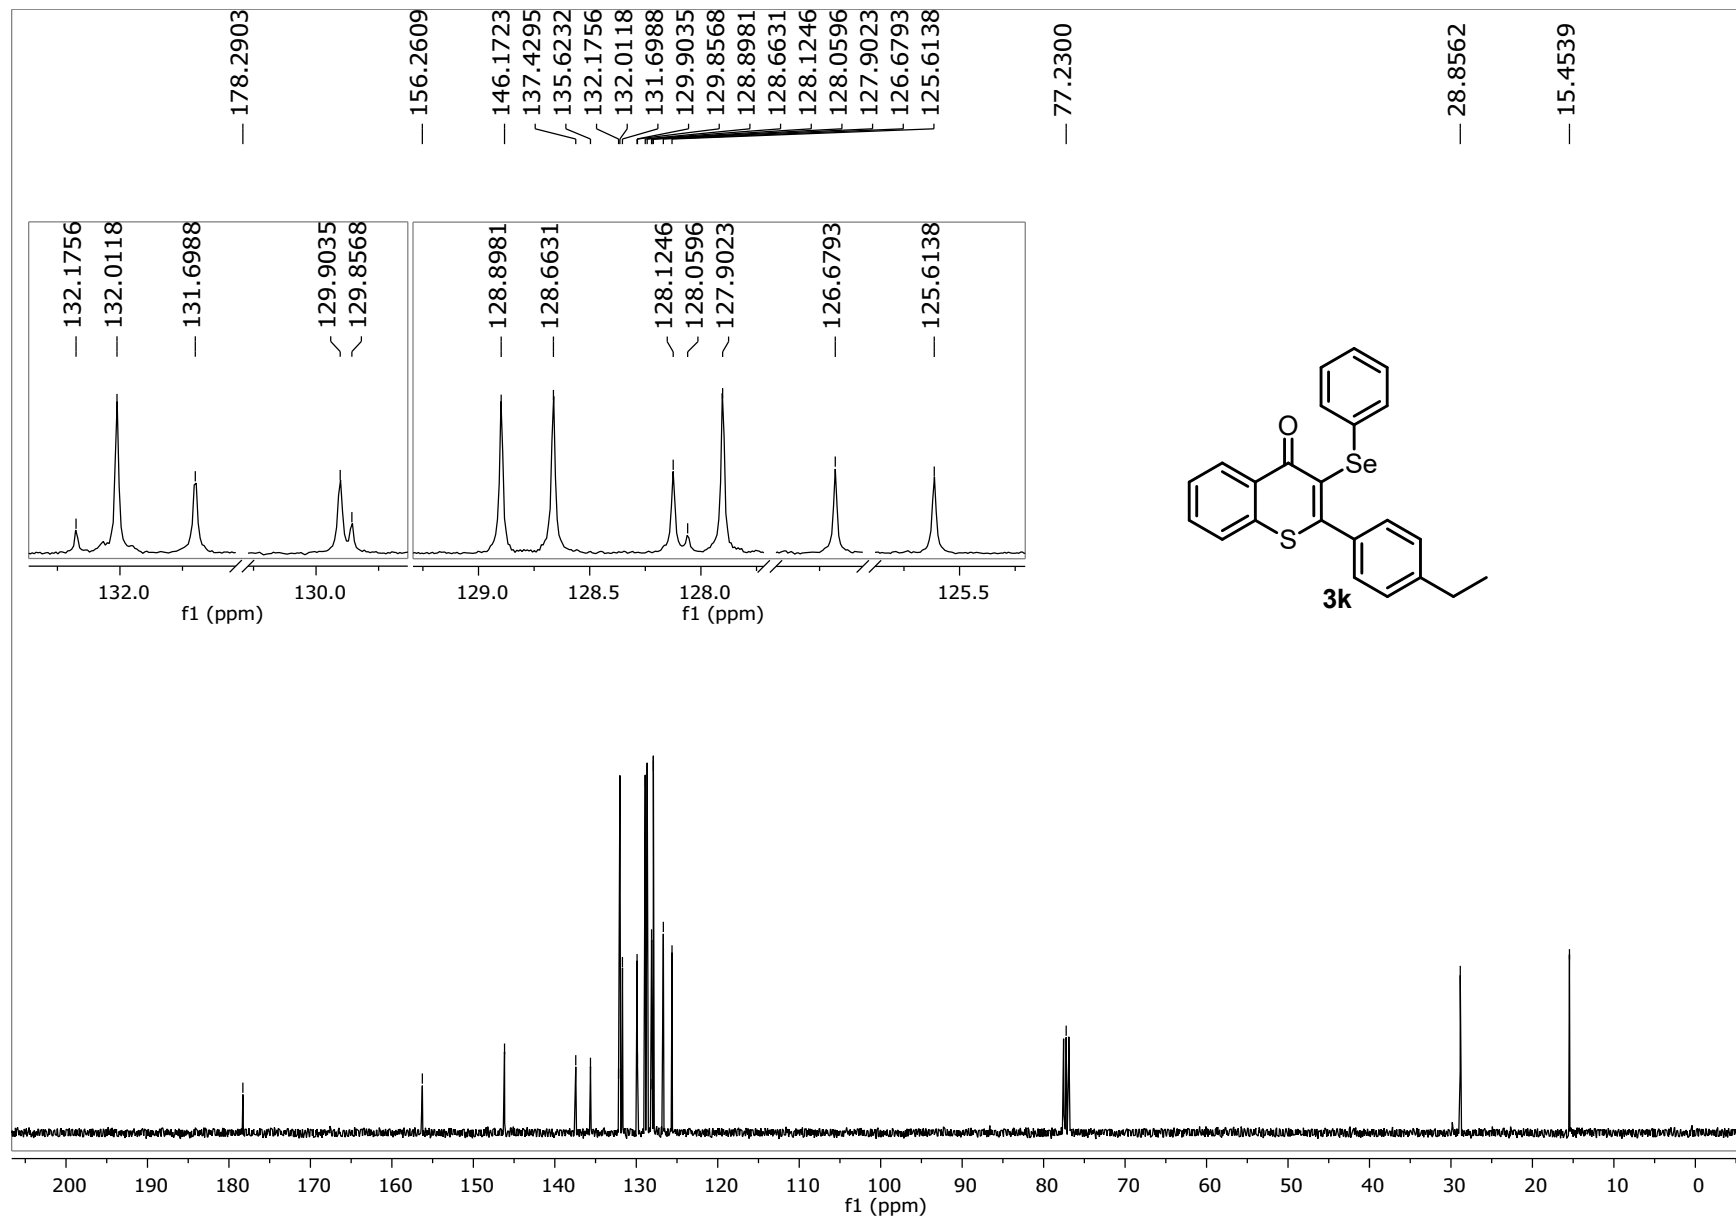

Figure S35:  $^{13}\text{C}\{^1\text{H}\}$  NMR (100 MHz,  $\text{CDCl}_3$ ) spectrum of compound **3k**.

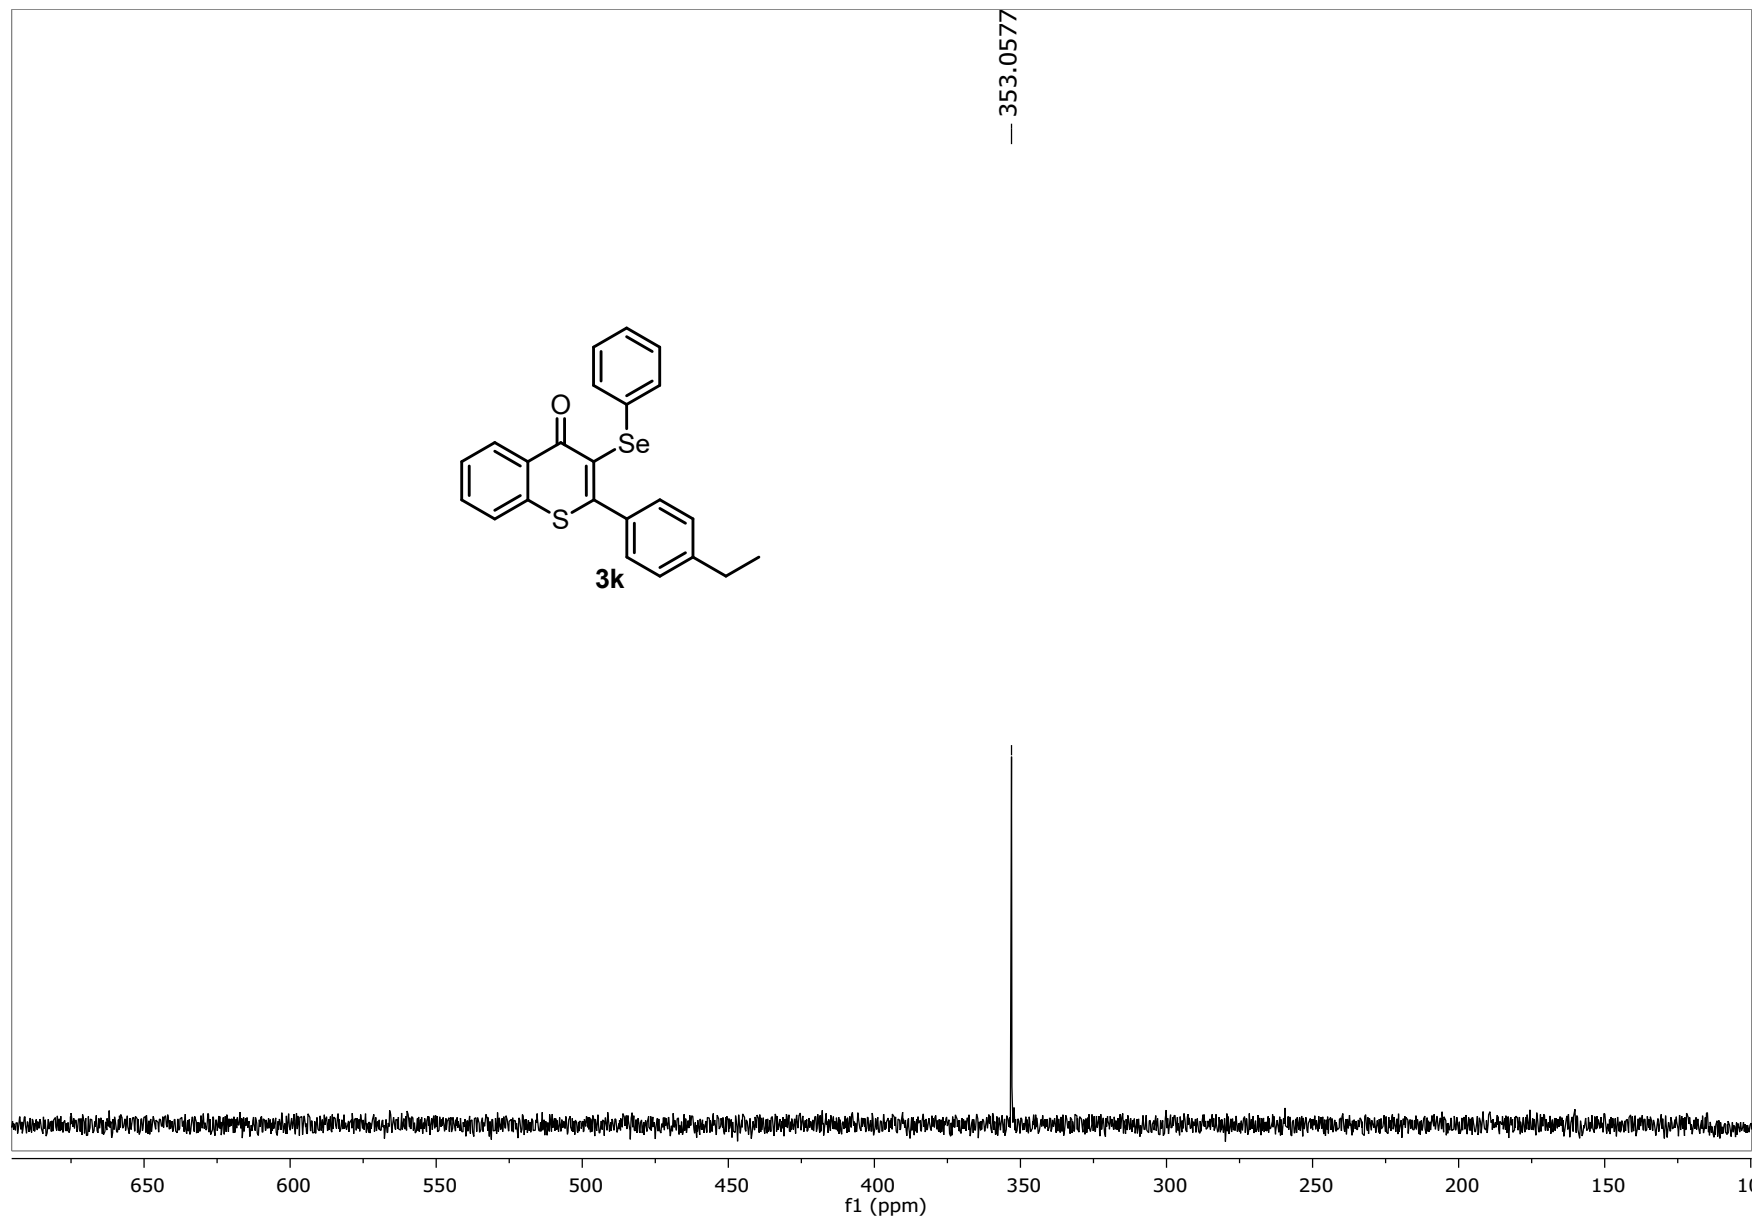

**Figure S36:**  $^{77}\text{Se}\{^1\text{H}\}$  NMR (76 MHz,  $\text{CDCl}_3$ ) spectrum of compound **3k**.

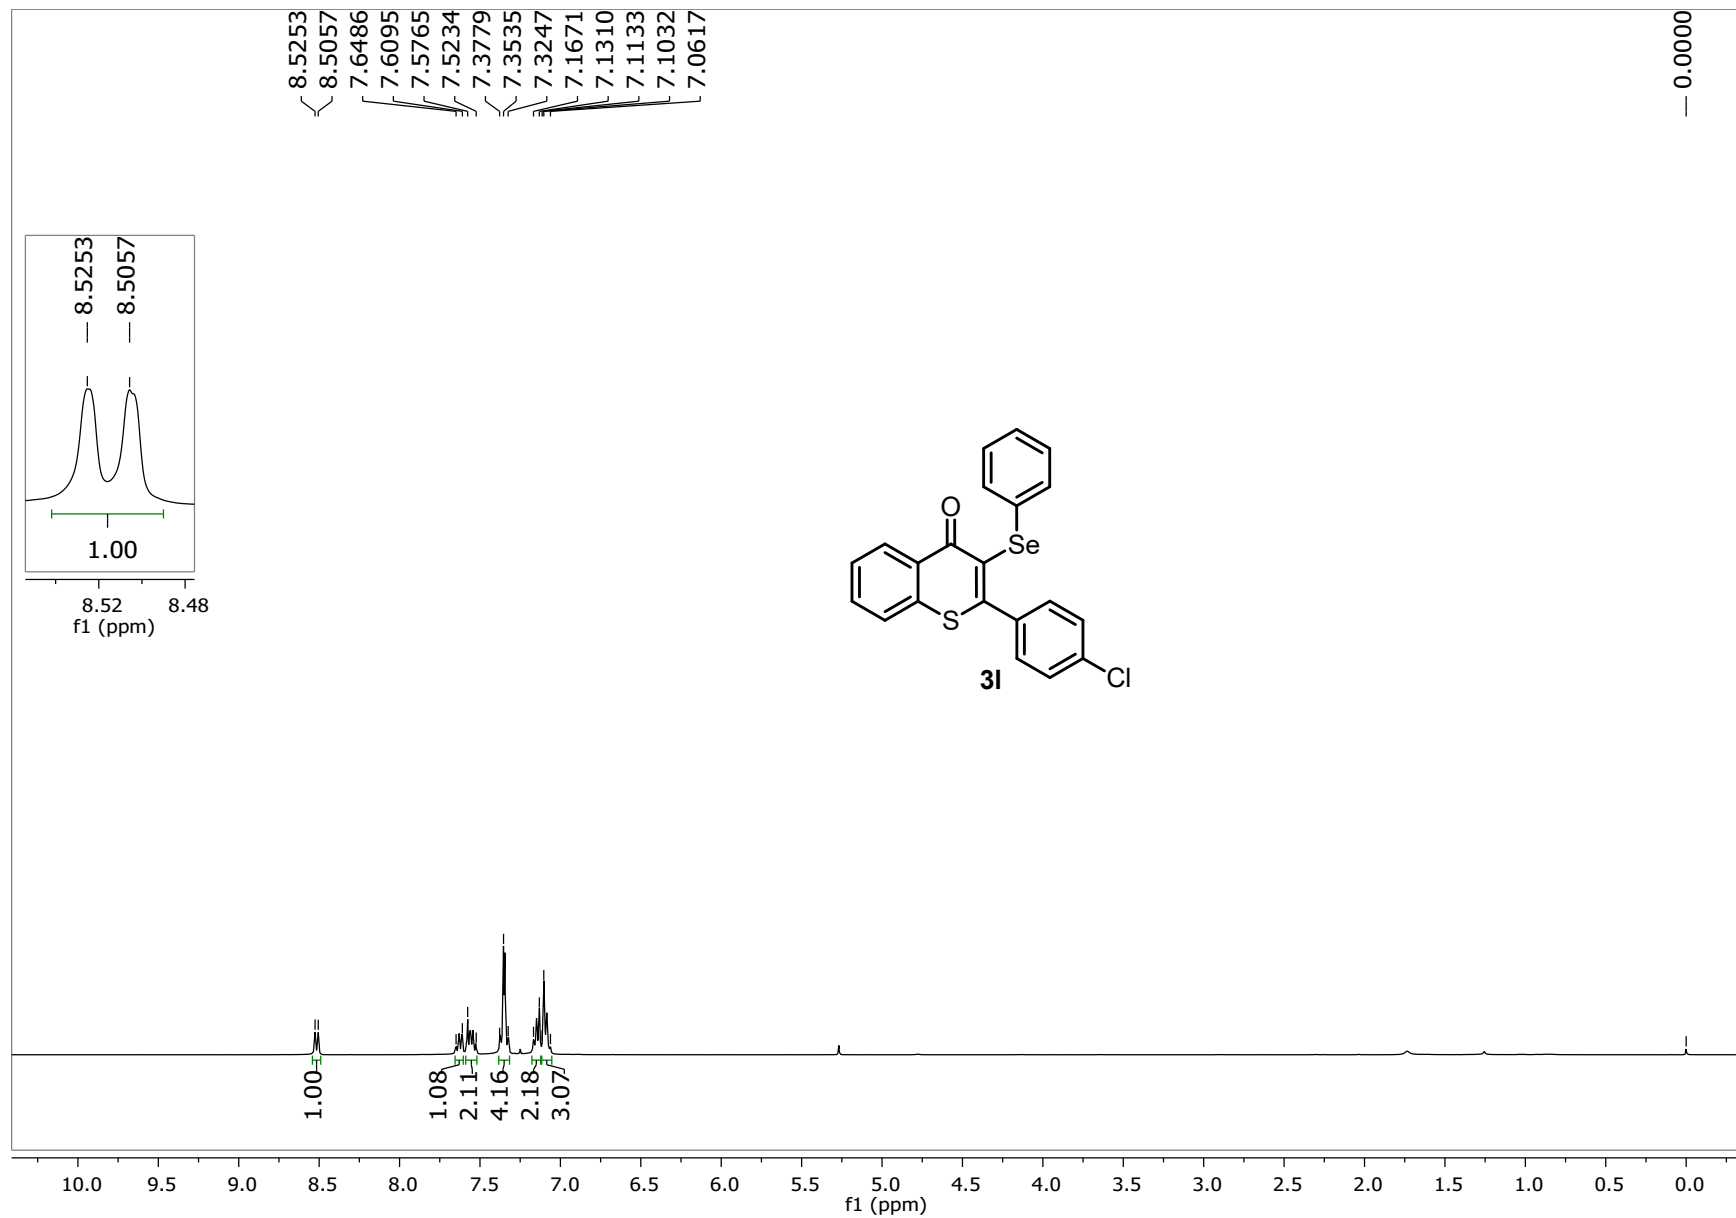

Figure S37:  $^1\text{H}$  NMR (400 MHz,  $\text{CDCl}_3$ ) spectrum of compound **3I**.

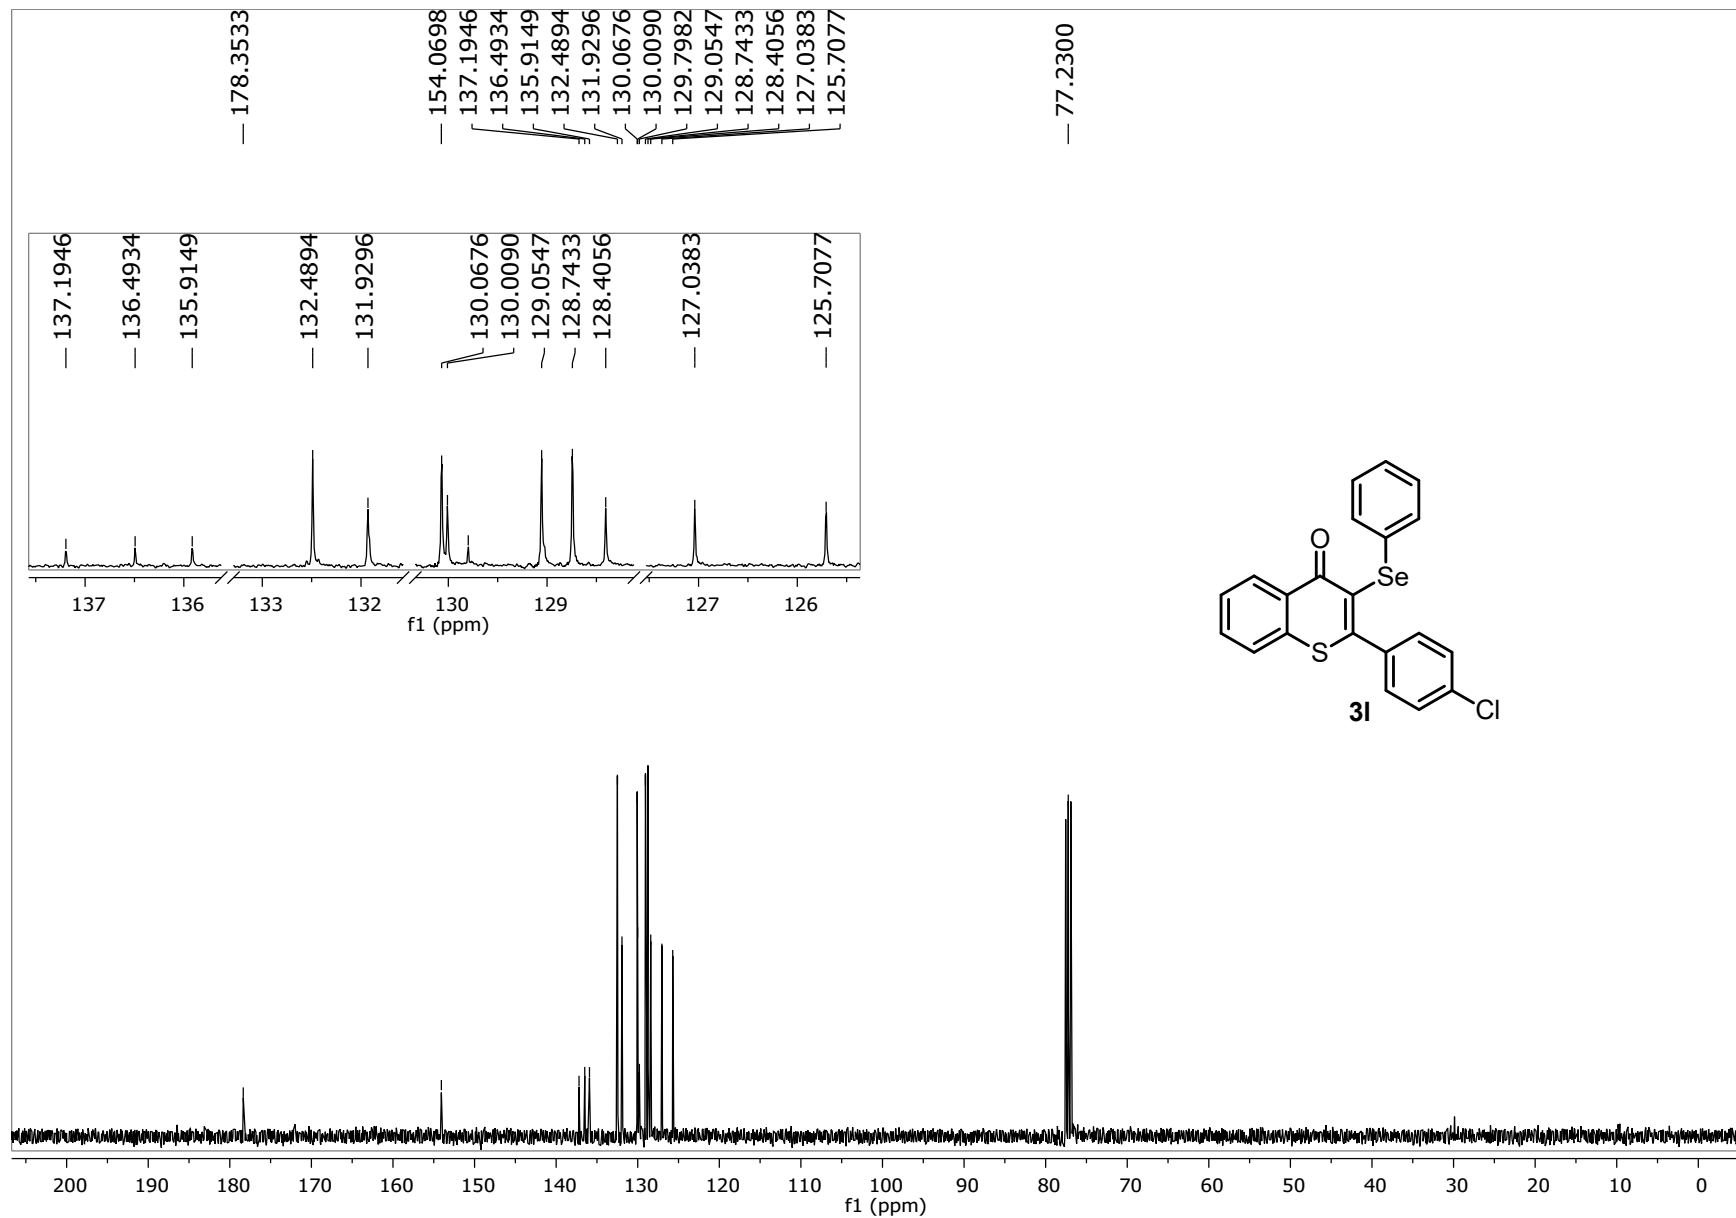

Figure S38:  $^{13}\text{C}\{^1\text{H}\}$  NMR (100 MHz,  $\text{CDCl}_3$ ) spectrum of compound **3l**.

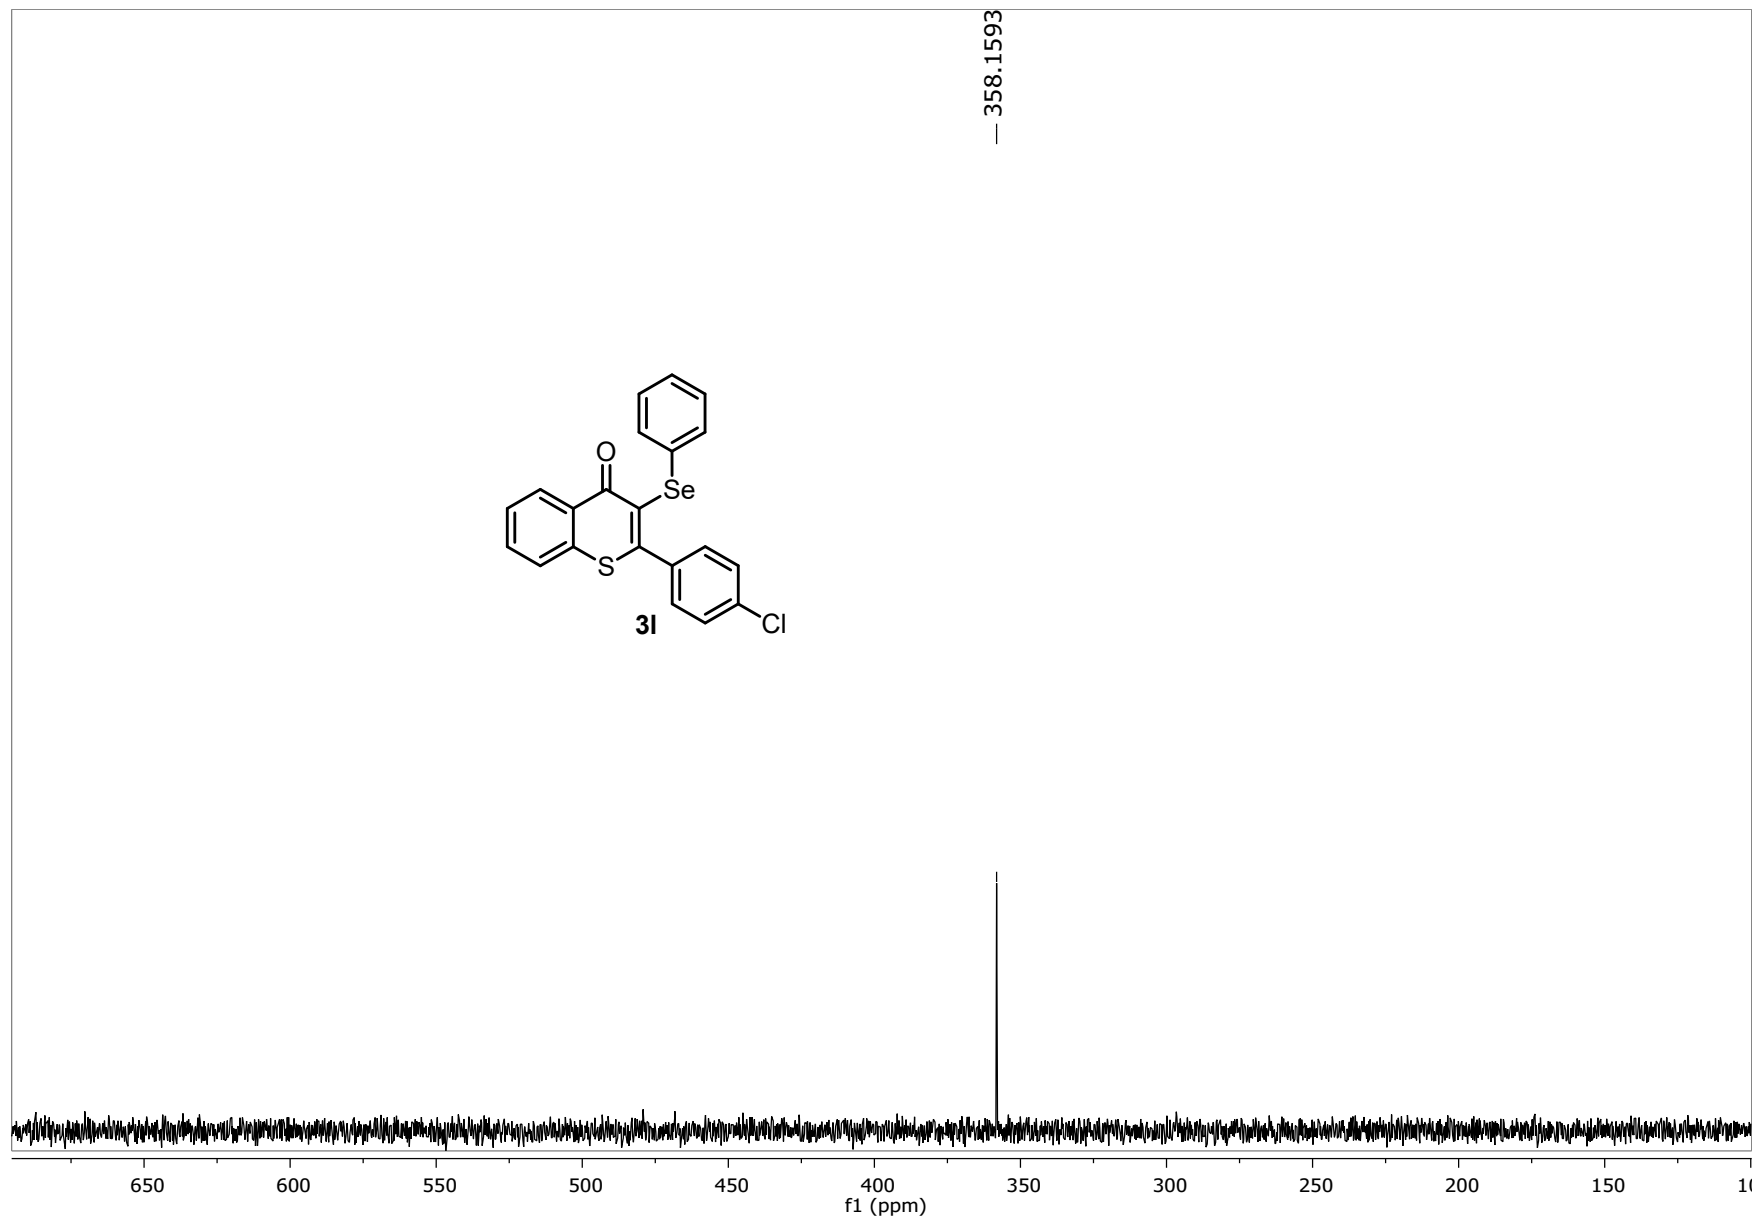

Figure S39:  $^{77}\text{Se}\{^1\text{H}\}$  NMR (76 MHz,  $\text{CDCl}_3$ ) spectrum of compound **3l**.



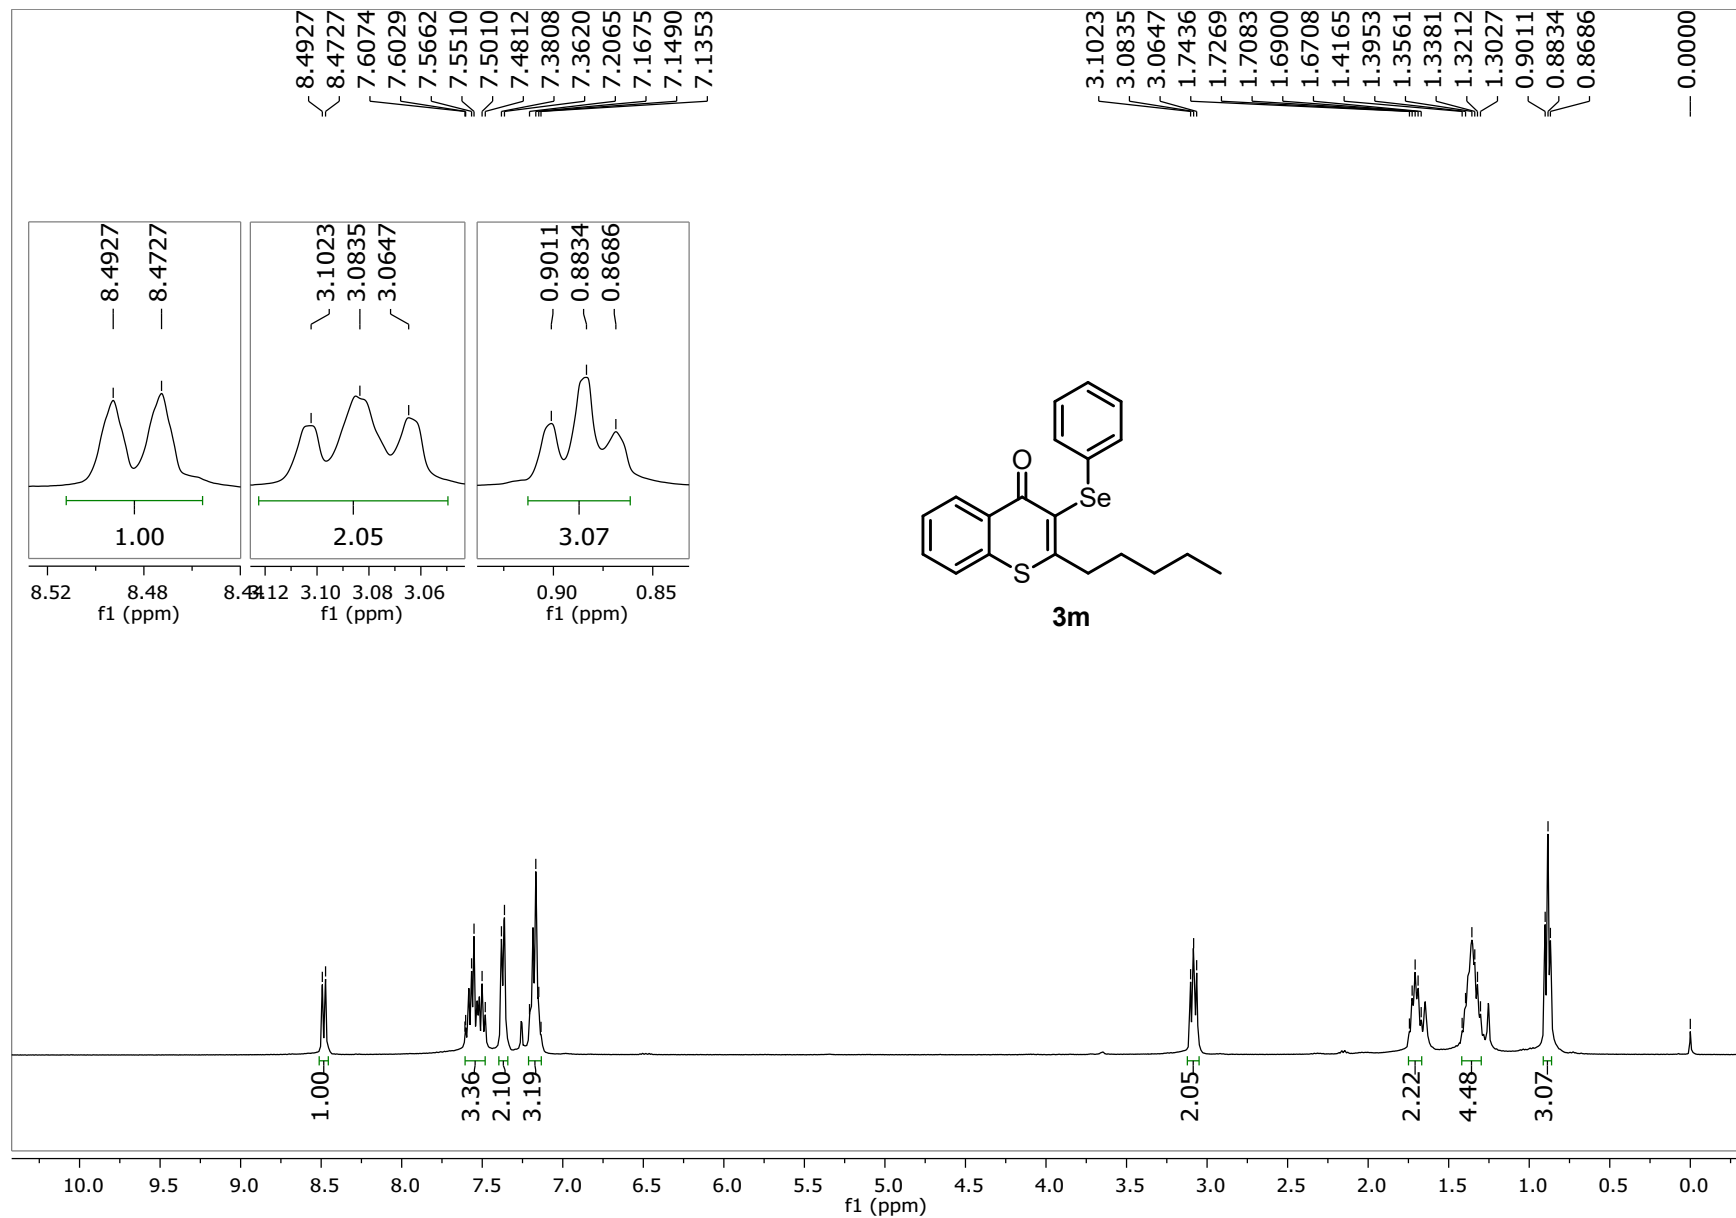

**Figure S40:**  $^1\text{H}$  NMR (400 MHz,  $\text{CDCl}_3$ ) spectrum of compound **3m**.

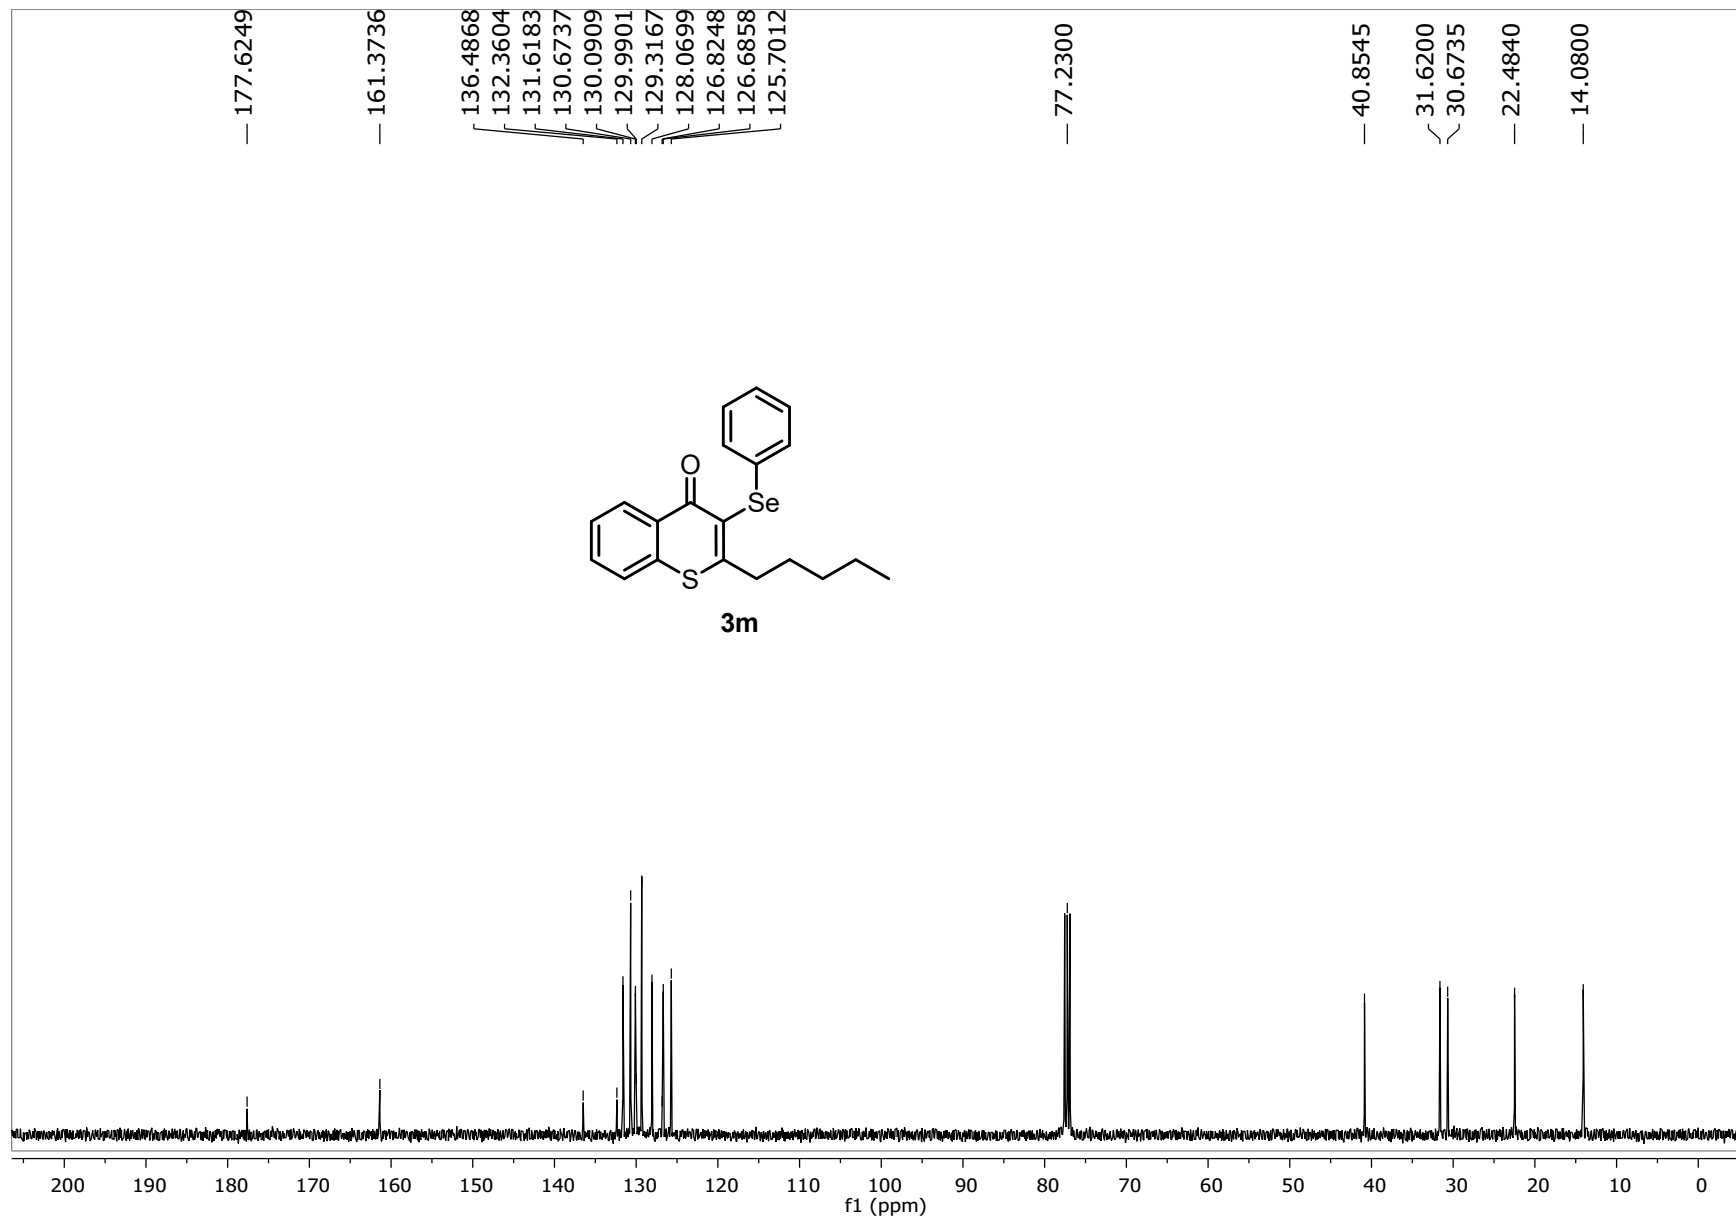

Figure S41:  $^{13}\text{C}\{^1\text{H}\}$  NMR (100 MHz,  $\text{CDCl}_3$ ) spectrum of compound **3m**.

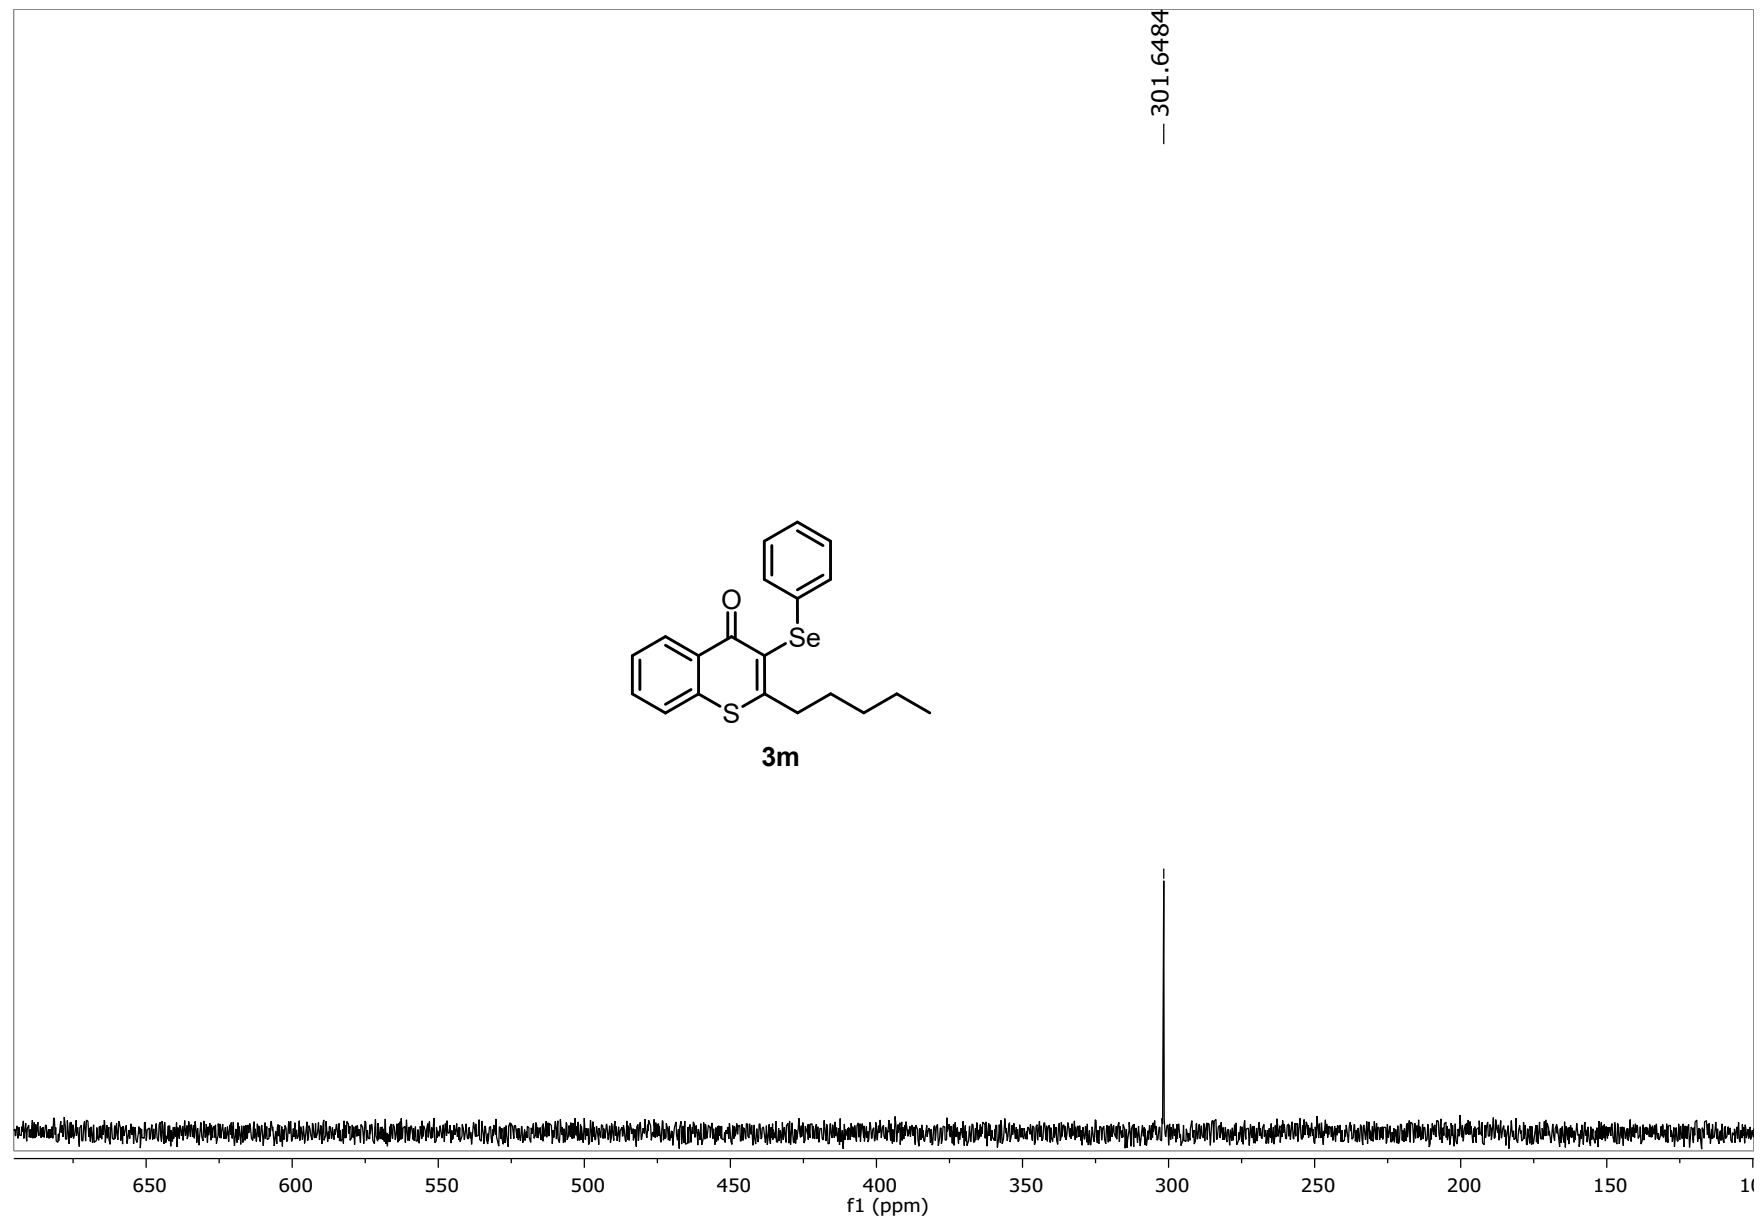

Figure S42:  $^{77}\text{Se}\{^1\text{H}\}$  NMR (76 MHz,  $\text{CDCl}_3$ ) spectrum of compound **3m**.

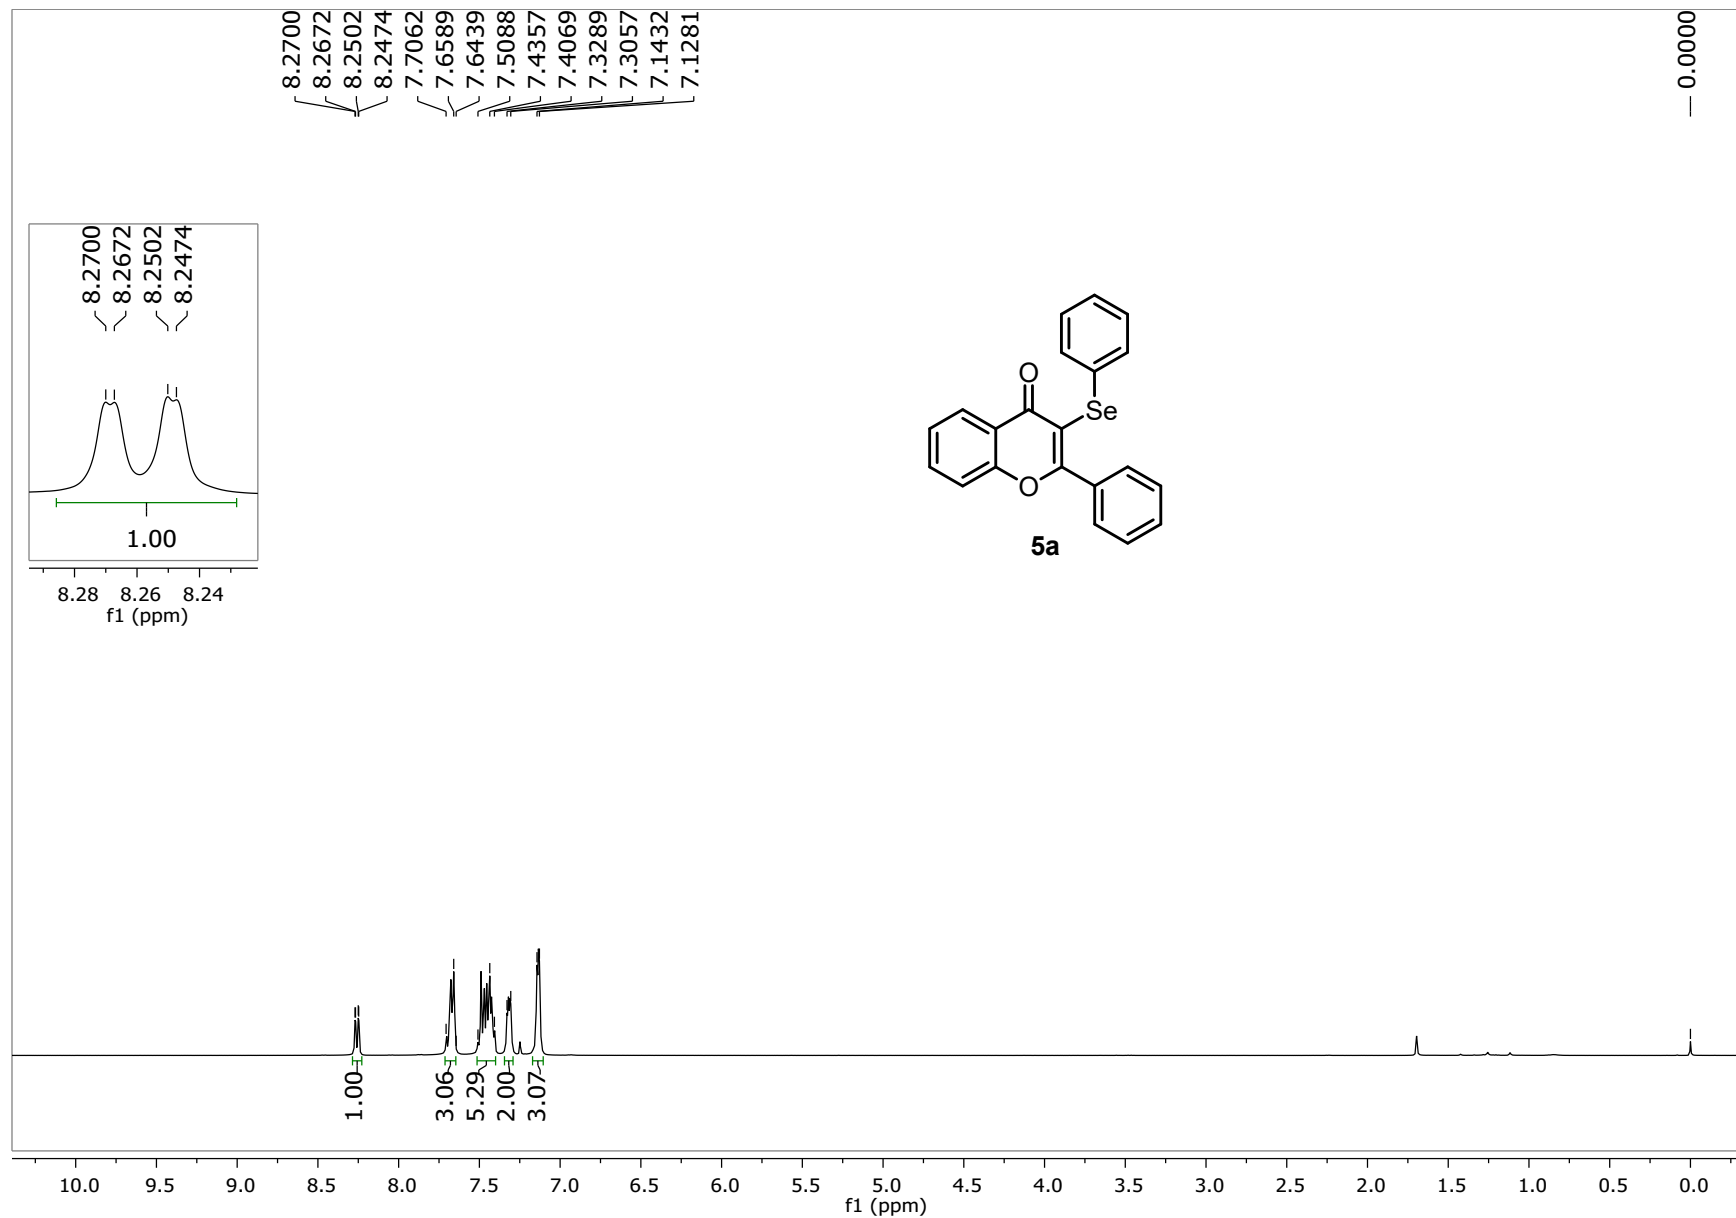

Figure S43:  $^1\text{H NMR}$  (400 MHz,  $\text{CDCl}_3$ ) spectrum of compound **5a**.

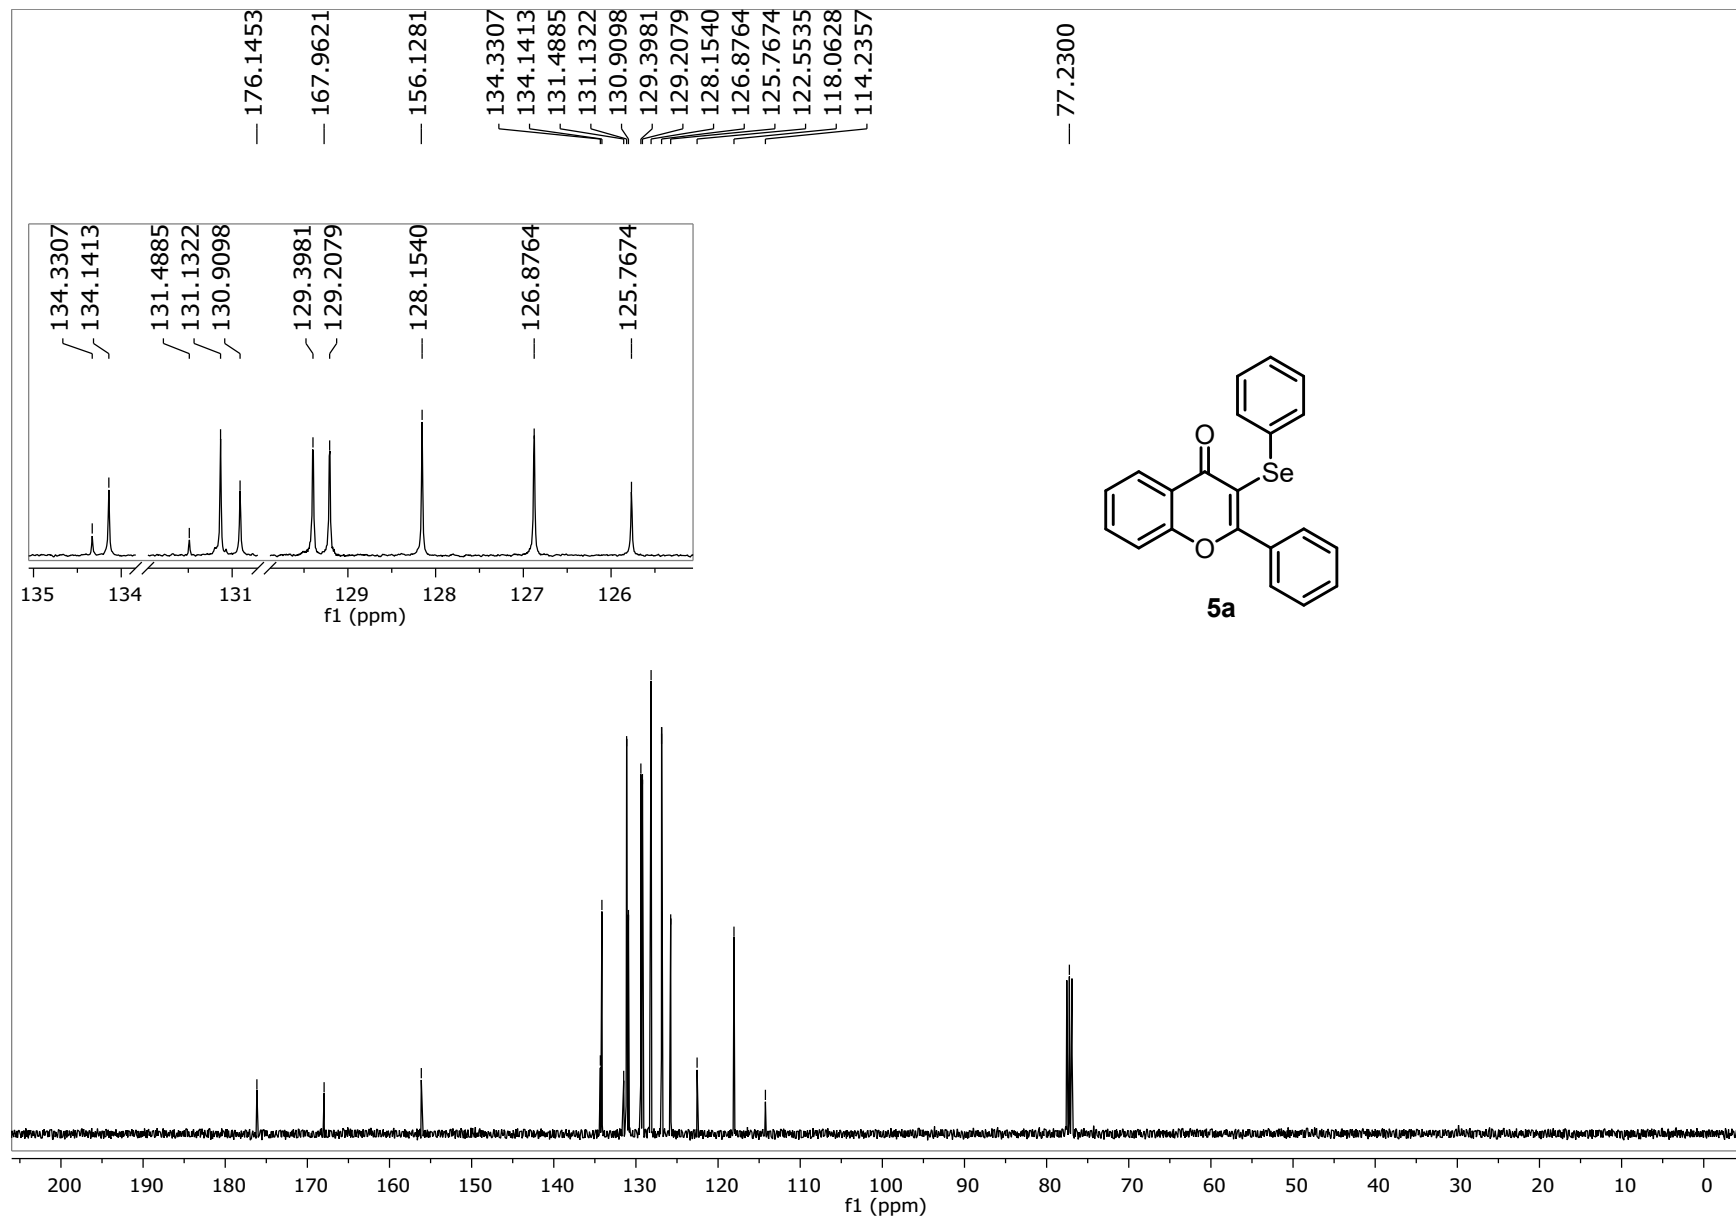

Figure S44: <sup>13</sup>C{<sup>1</sup>H} NMR (100 MHz, CDCl<sub>3</sub>) spectrum of compound **5a**.

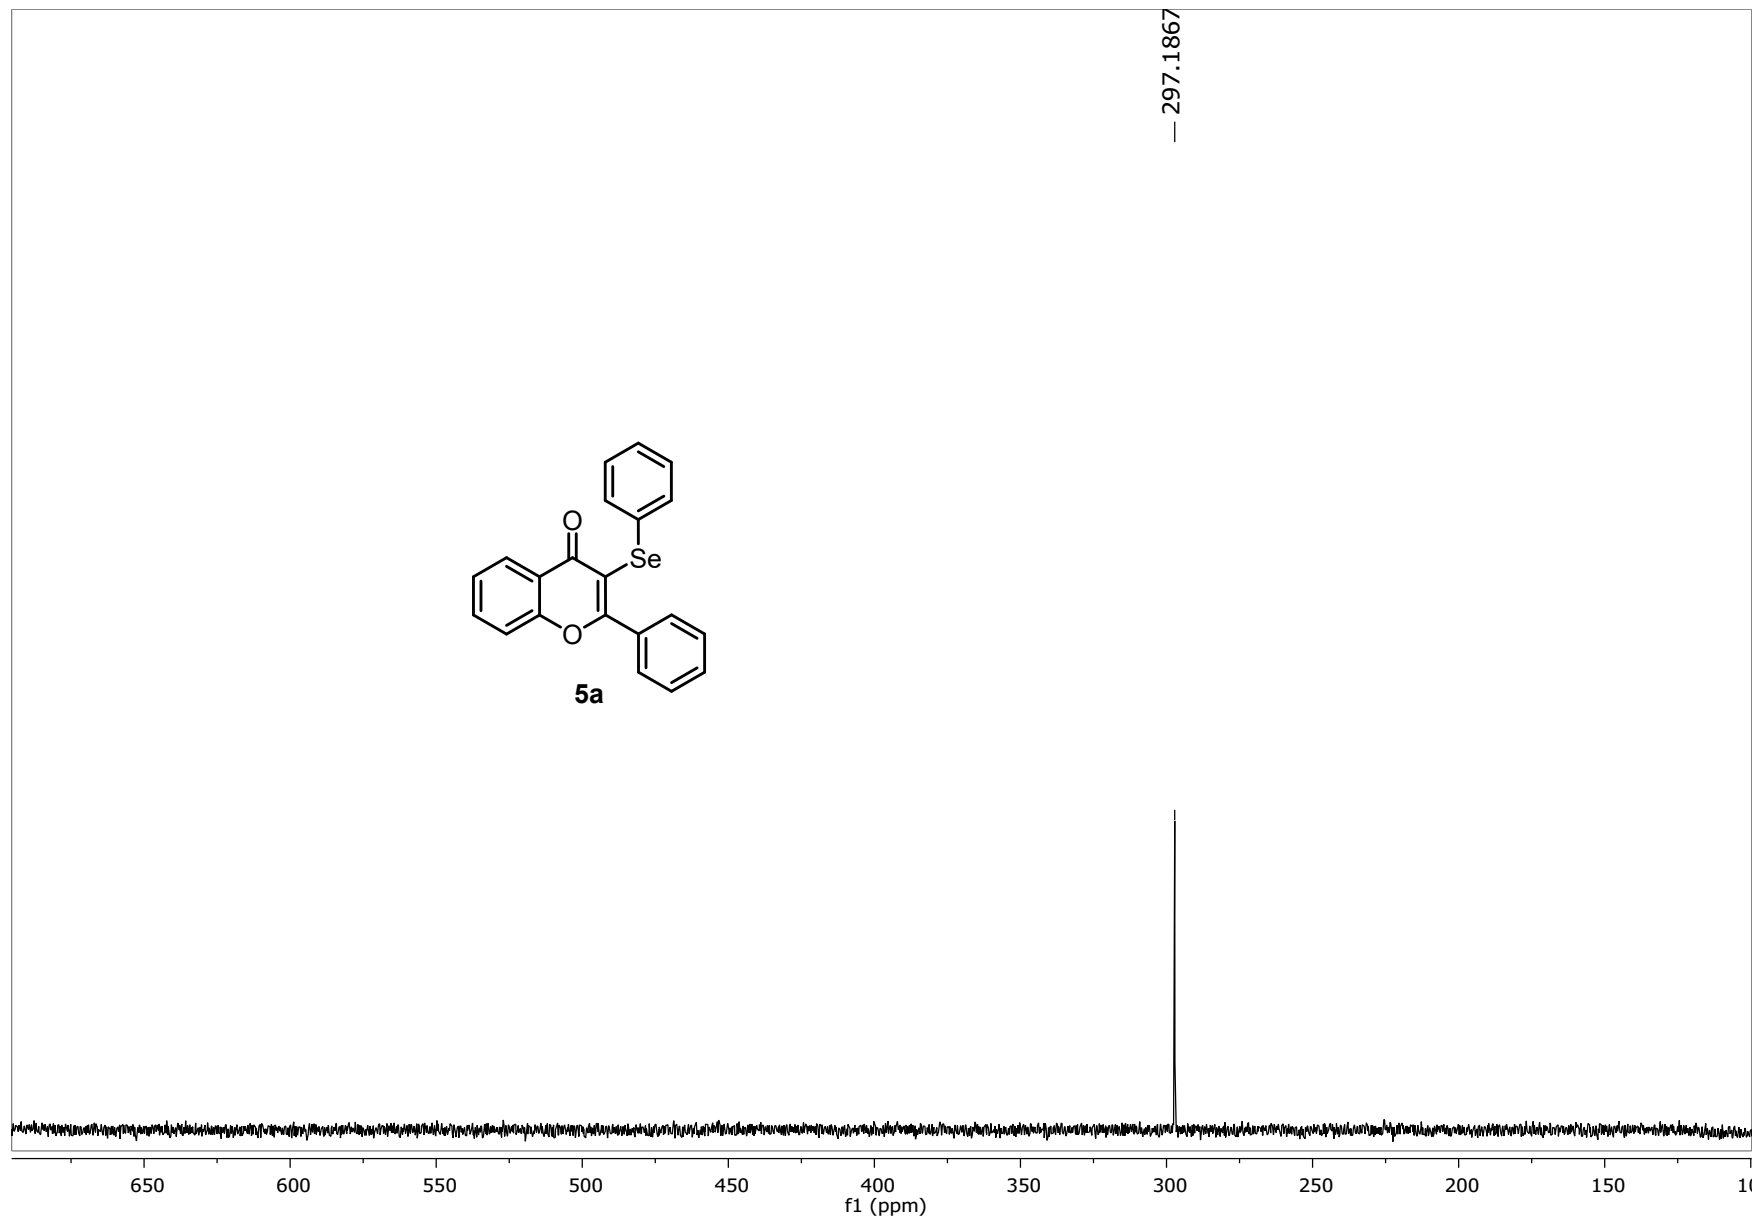

Figure S45:  $^{77}\text{Se}\{^1\text{H}\}$  NMR (76 MHz,  $\text{CDCl}_3$ ) spectrum of compound **5a**.

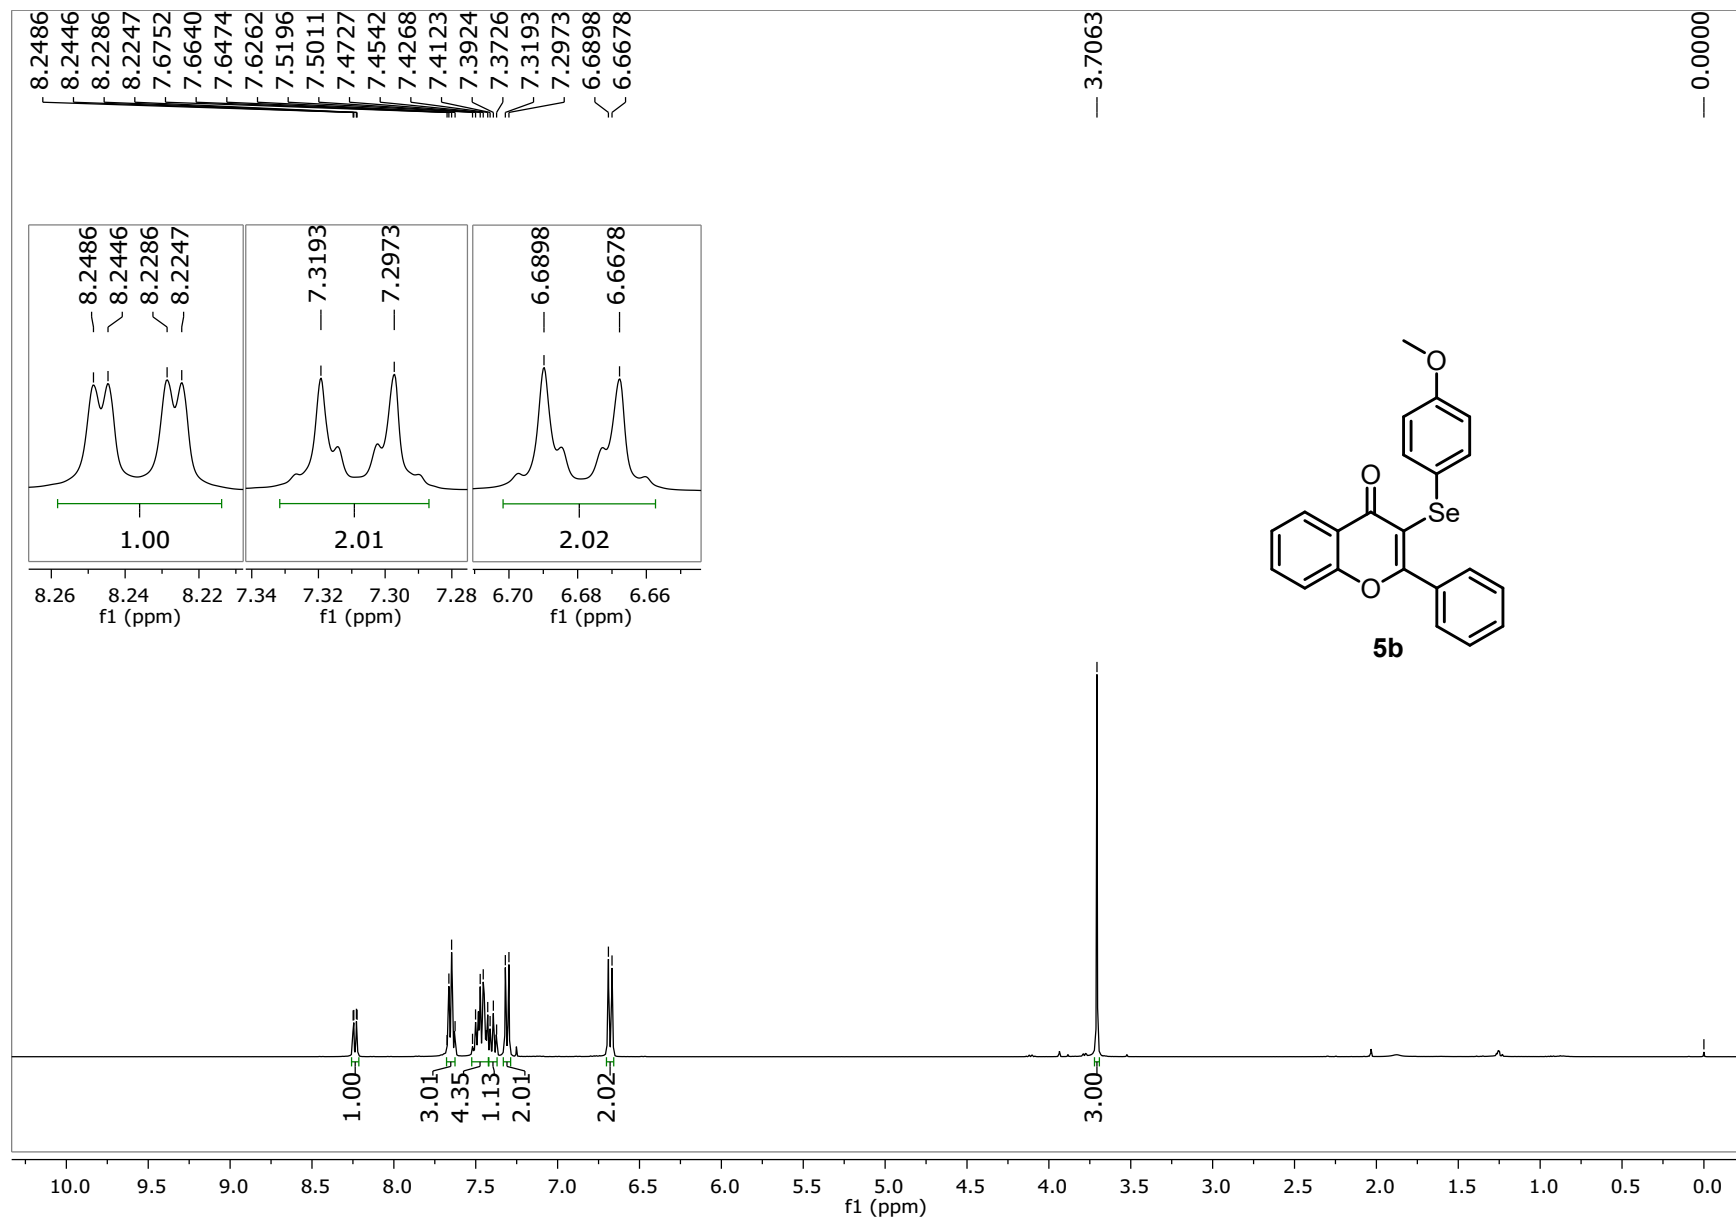

Figure S46: <sup>1</sup>H NMR (400 MHz, CDCl<sub>3</sub>) spectrum of compound **5b**.

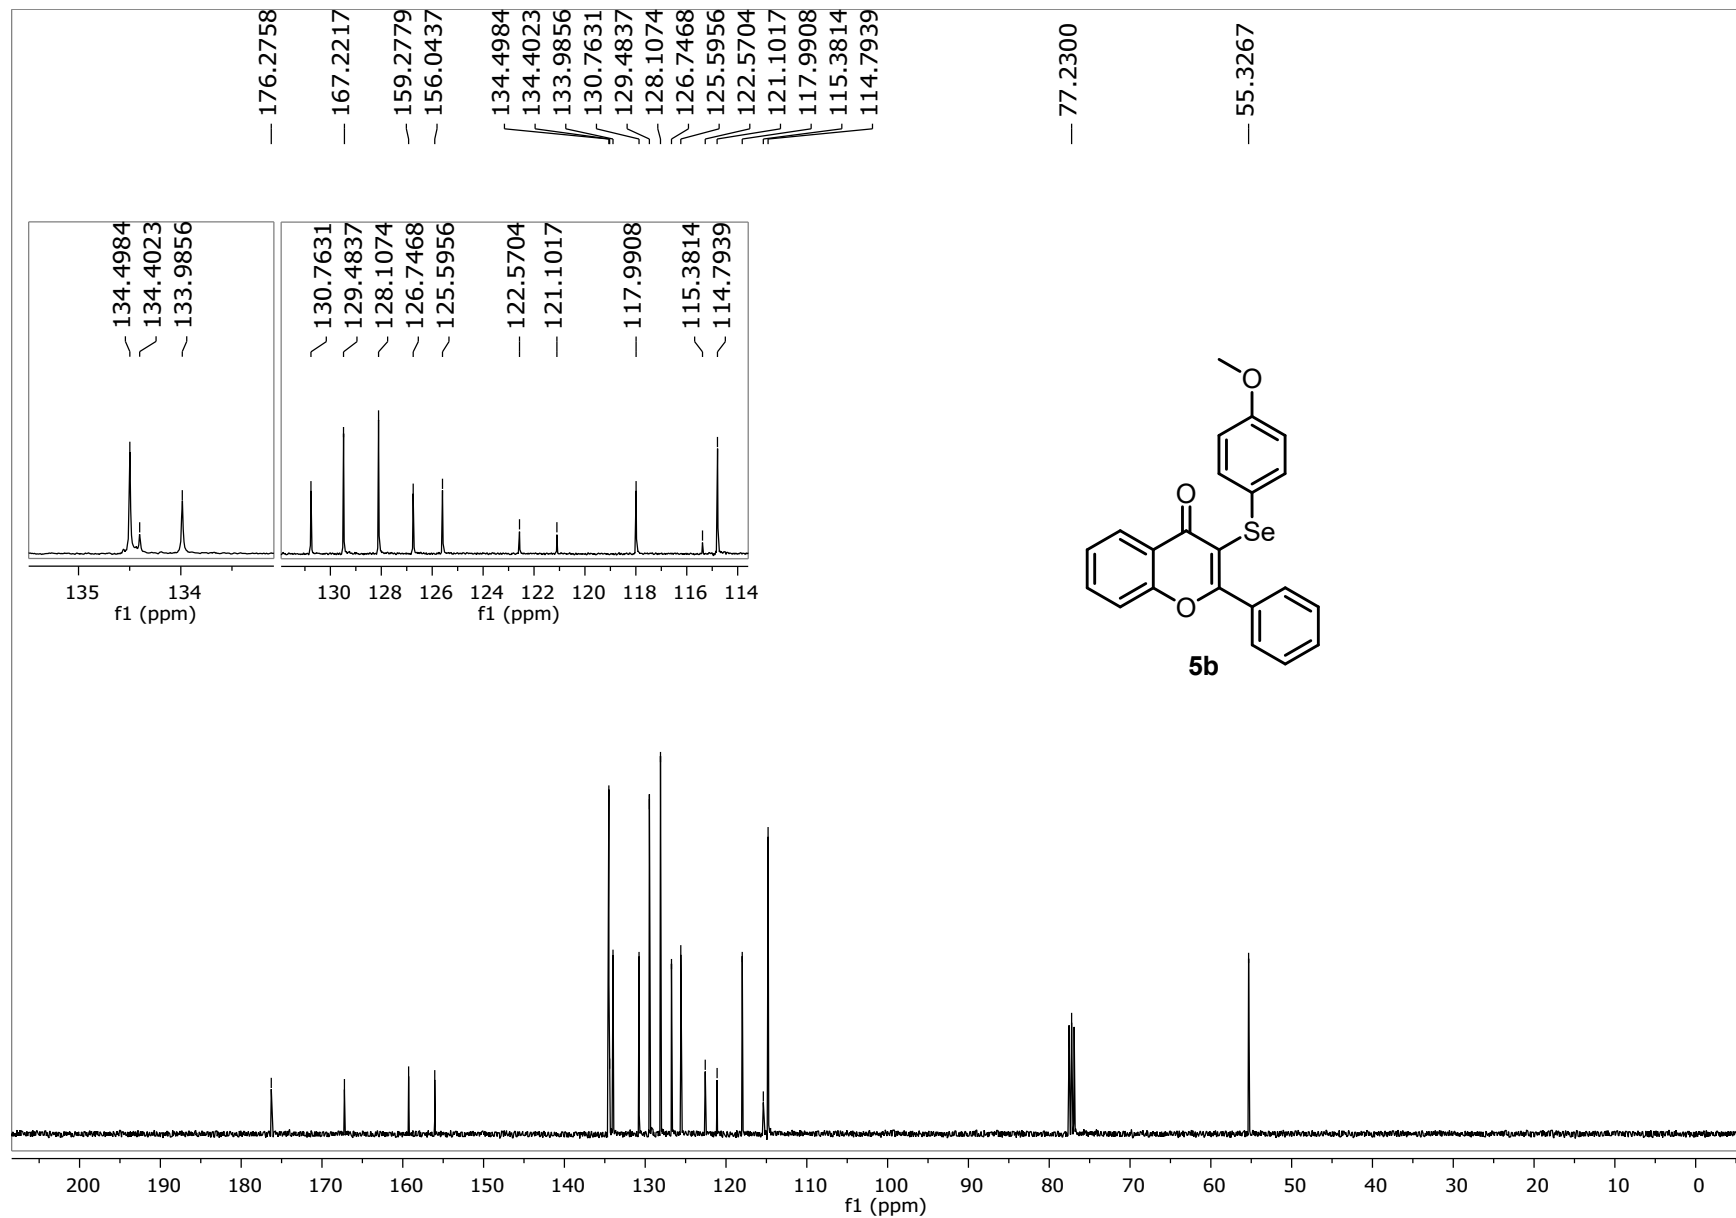

Figure S47: <sup>13</sup>C{<sup>1</sup>H} NMR (100 MHz, CDCl<sub>3</sub>) spectrum of compound **5b**.



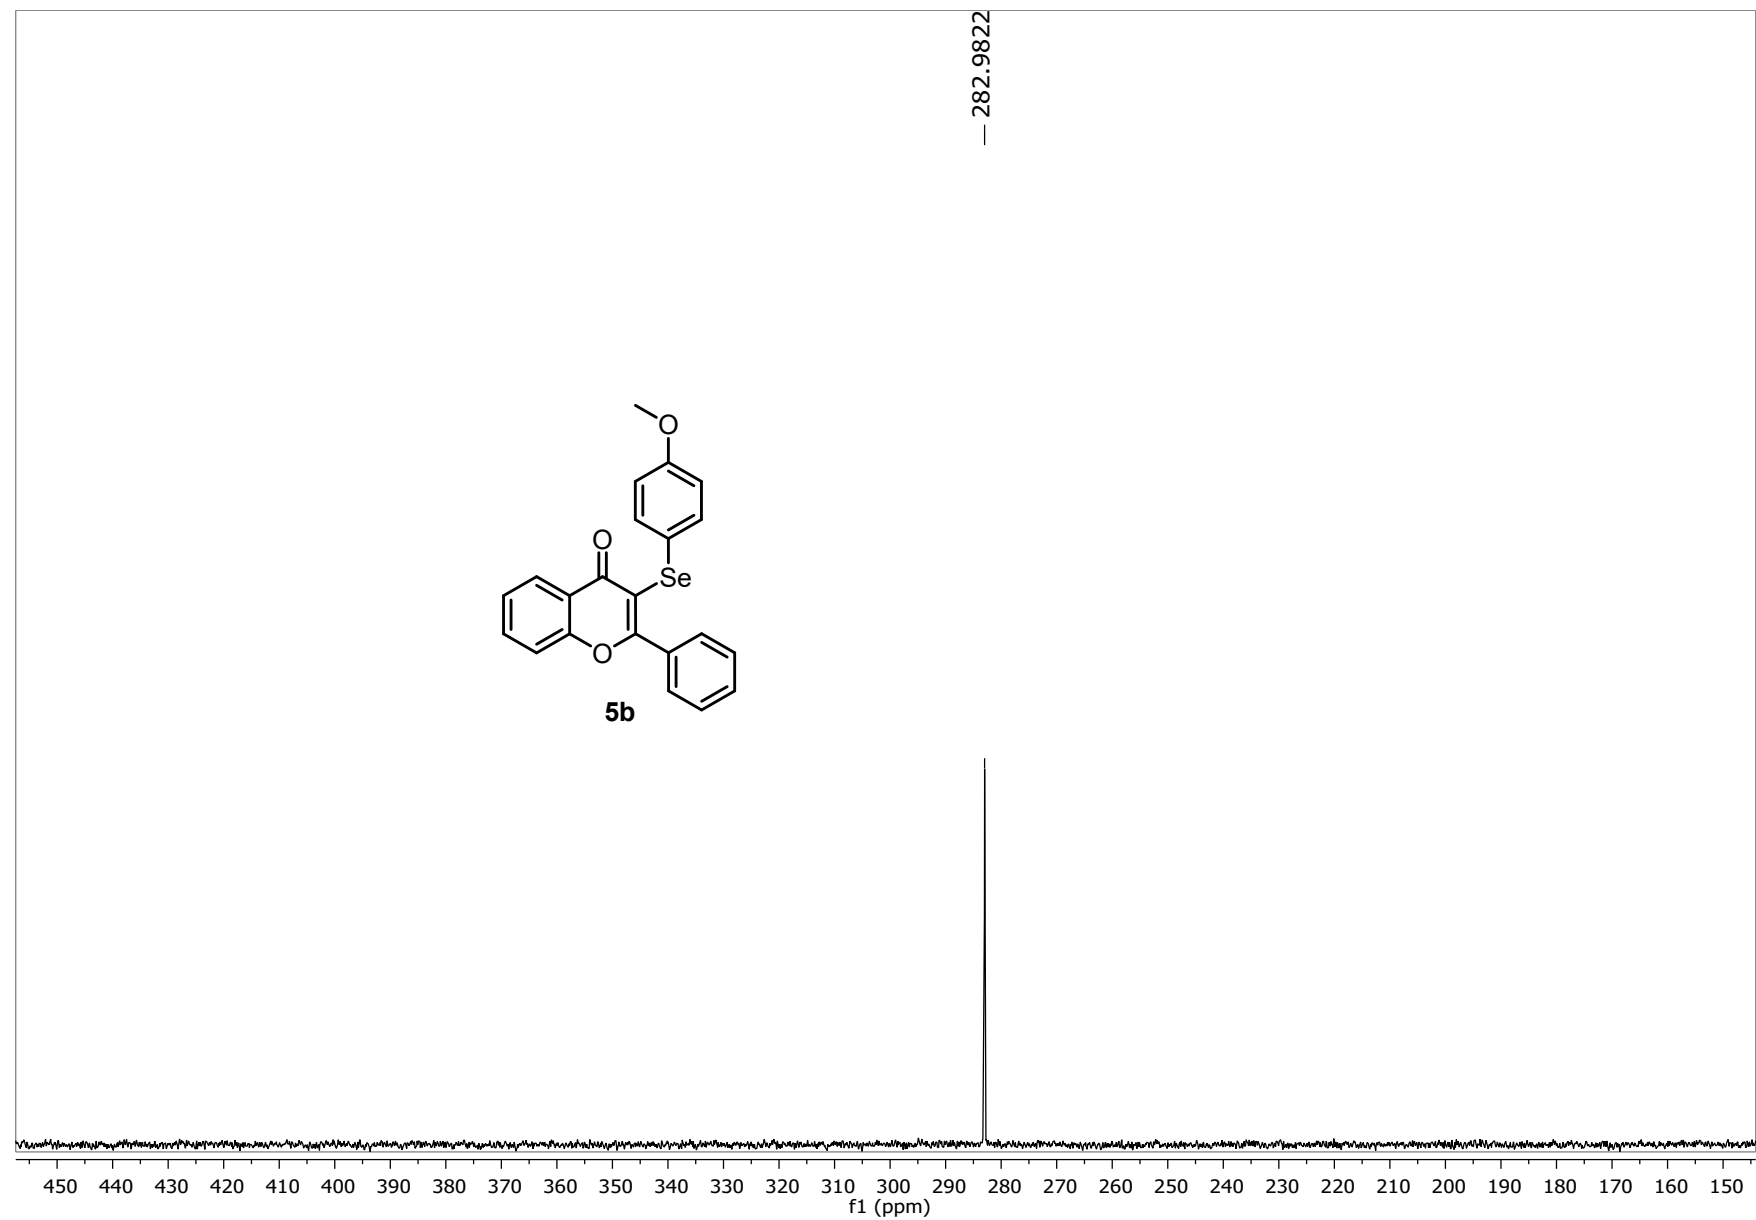

Figure S48:  $^{77}\text{Se}\{^1\text{H}\}$  NMR (76 MHz,  $\text{CDCl}_3$ ) spectrum of compound **5b**.

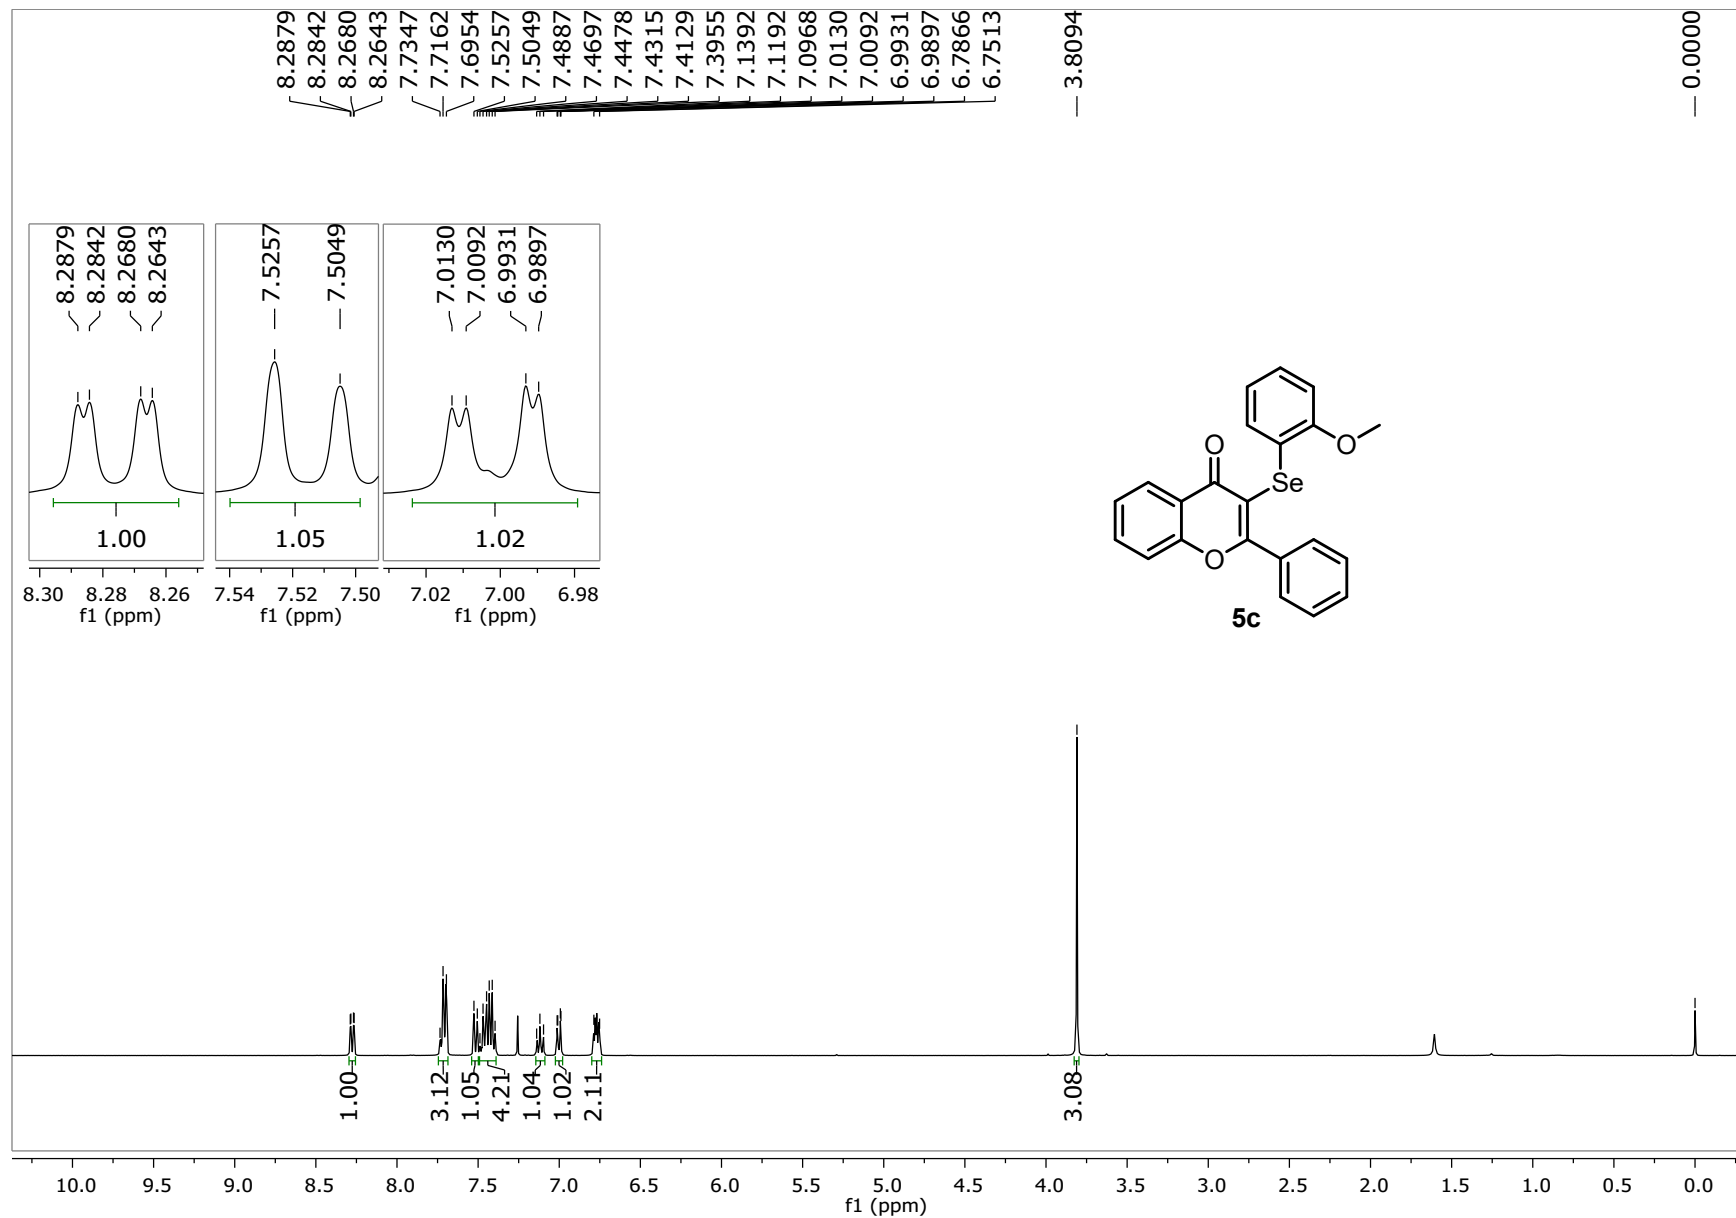

Figure S49: <sup>1</sup>H NMR (400 MHz, CDCl<sub>3</sub>) spectrum of compound **5c**.

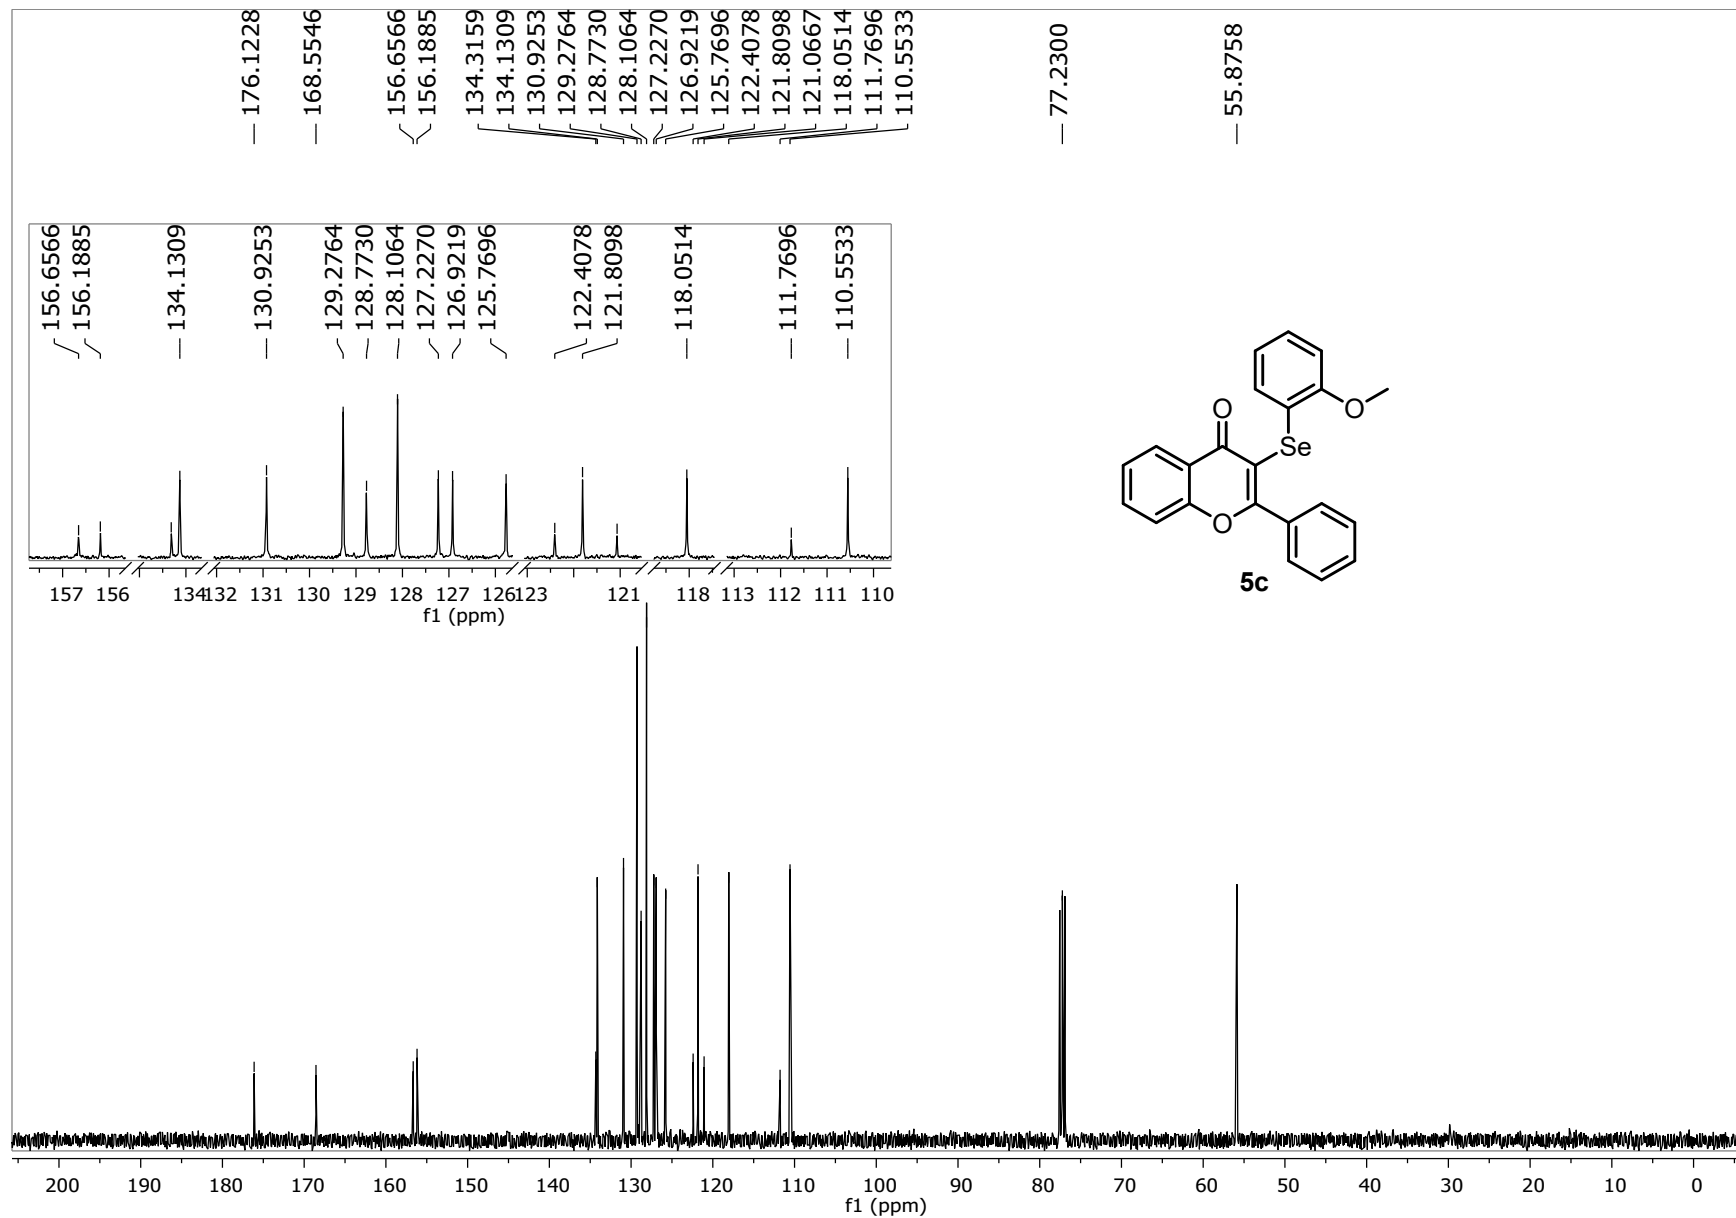

Figure S50:  $^{13}\text{C}\{^1\text{H}\}$  NMR (100 MHz,  $\text{CDCl}_3$ ) spectrum of compound **5c**.

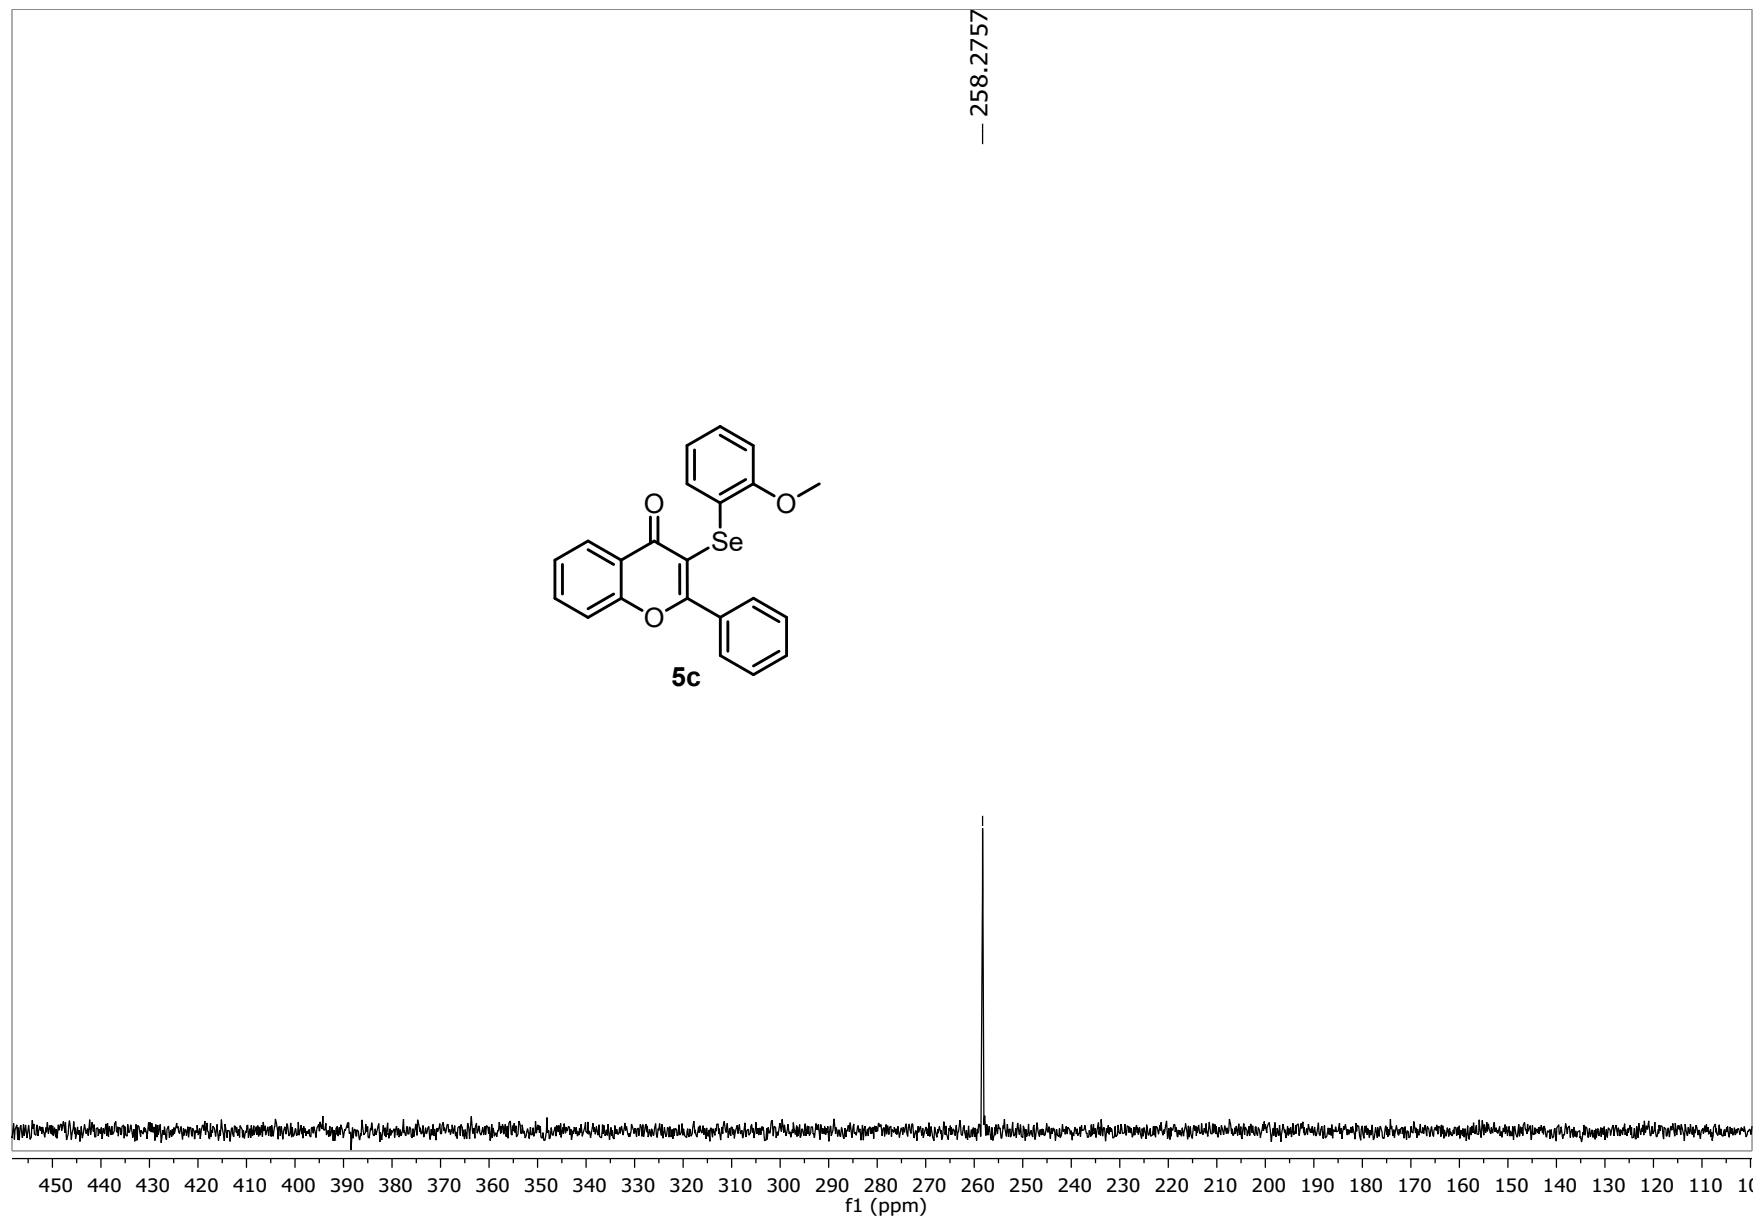

**Figure S51:**  $^{77}\text{Se}\{^1\text{H}\}$  NMR (76 MHz,  $\text{CDCl}_3$ ) spectrum of compound **5c**.

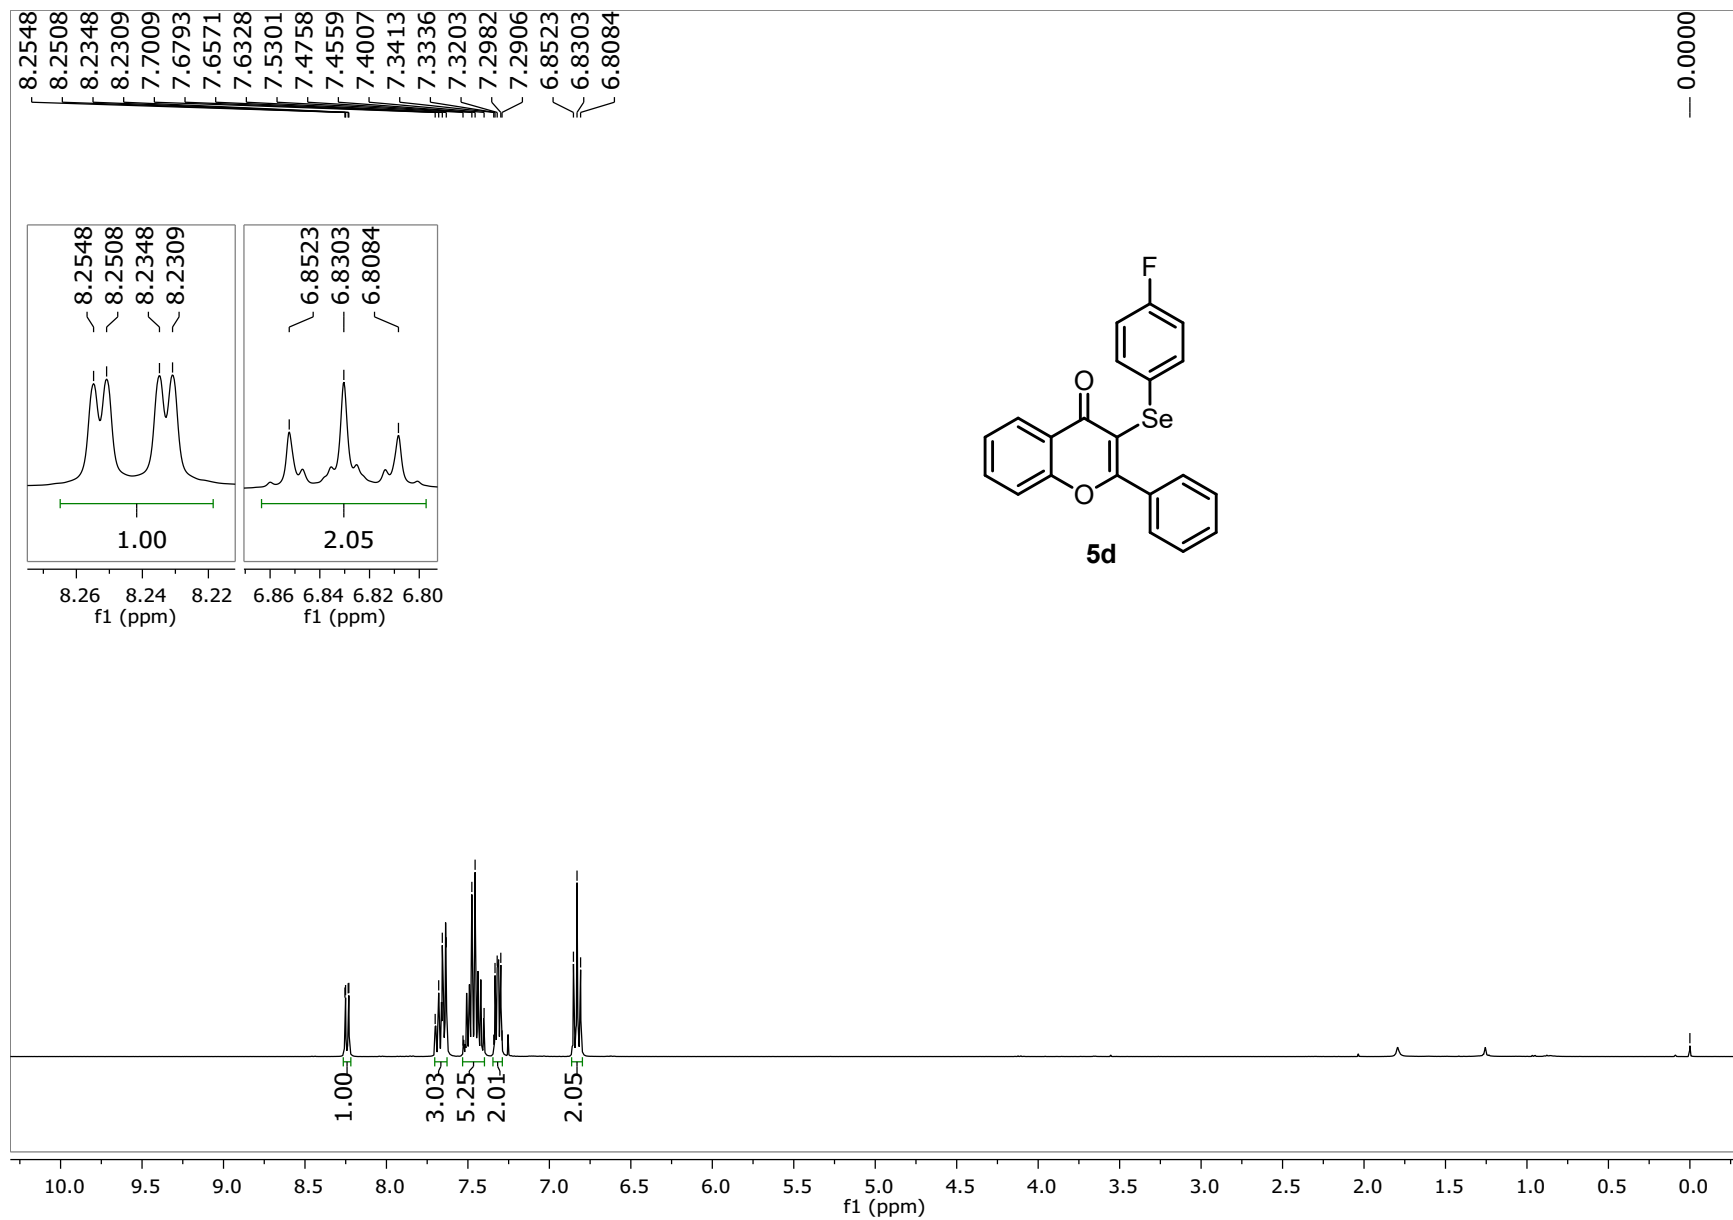

Figure S52: <sup>1</sup>H NMR (400 MHz, CDCl<sub>3</sub>) spectrum of compound **5d**.

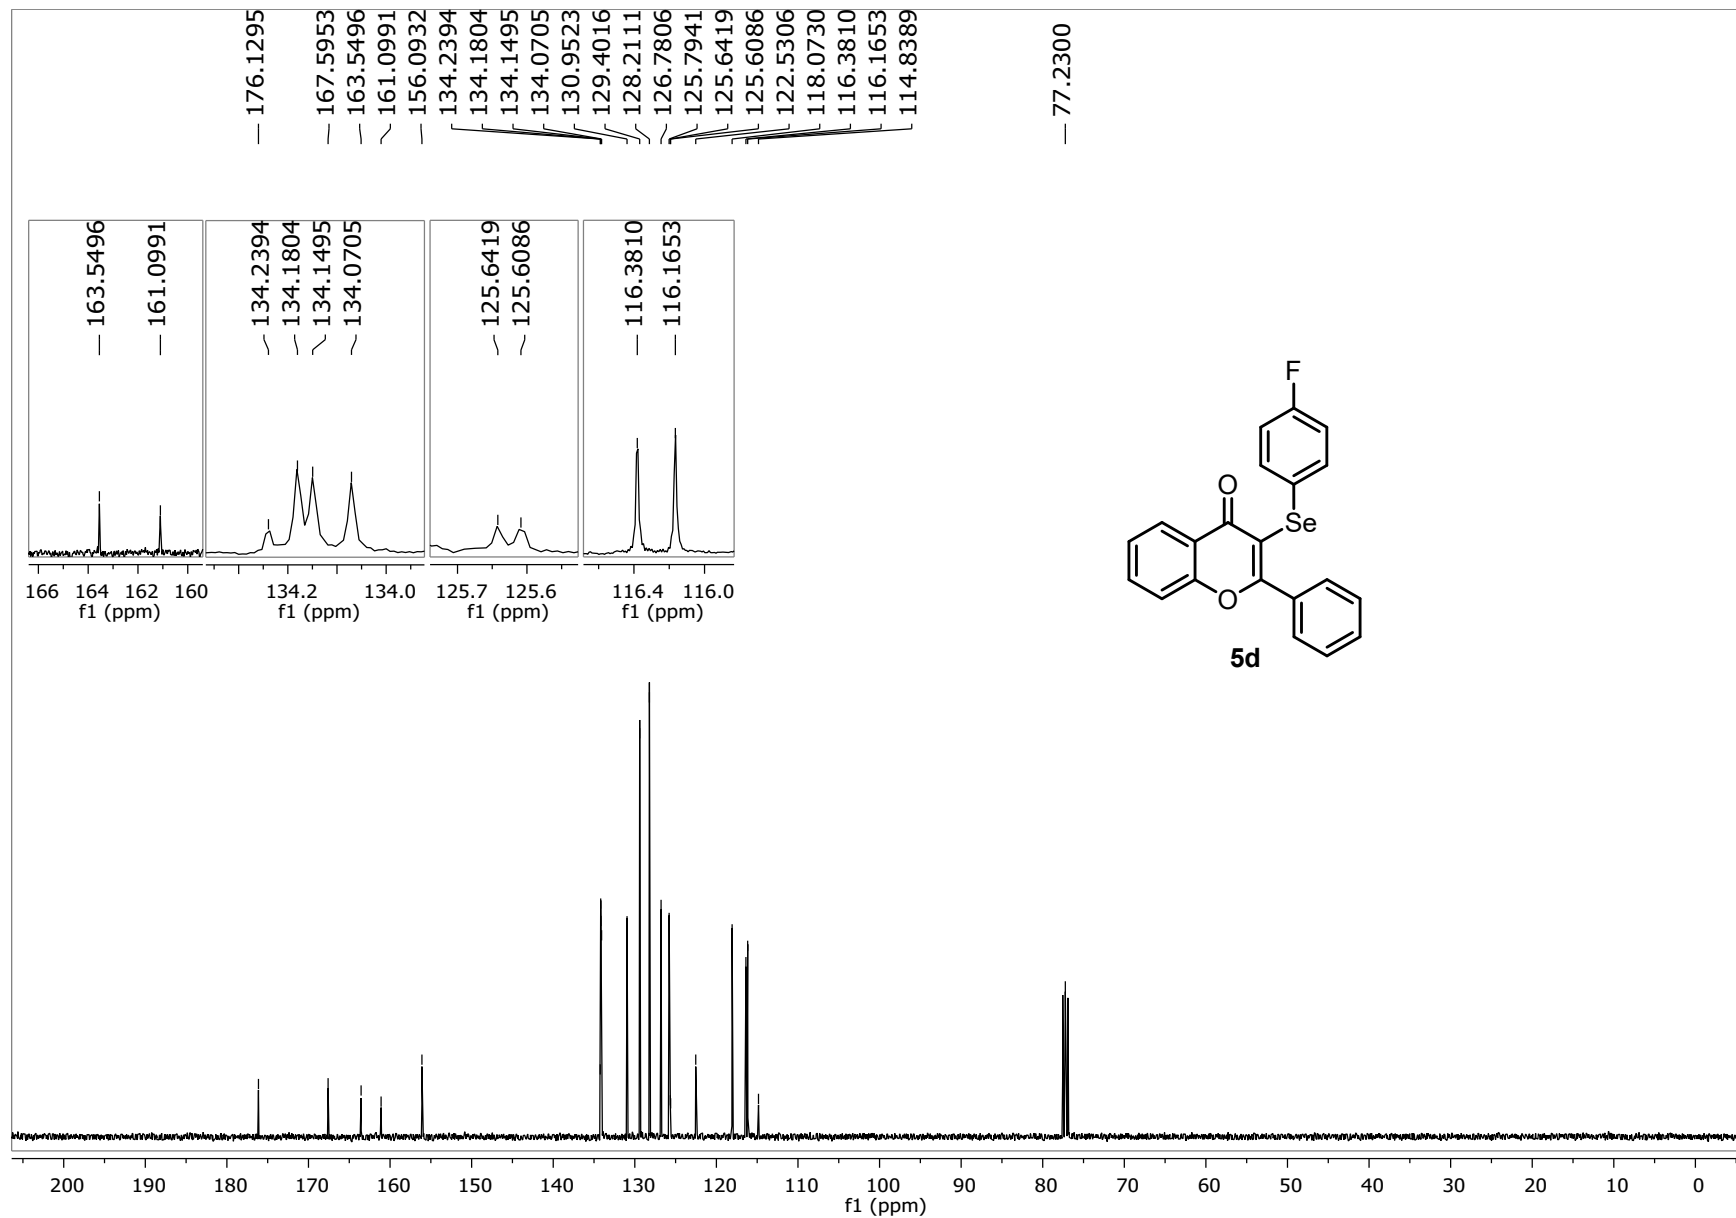

Figure S53:  $^{13}\text{C}\{^1\text{H}\}$  NMR (100 MHz,  $\text{CDCl}_3$ ) spectrum of compound **5d**.

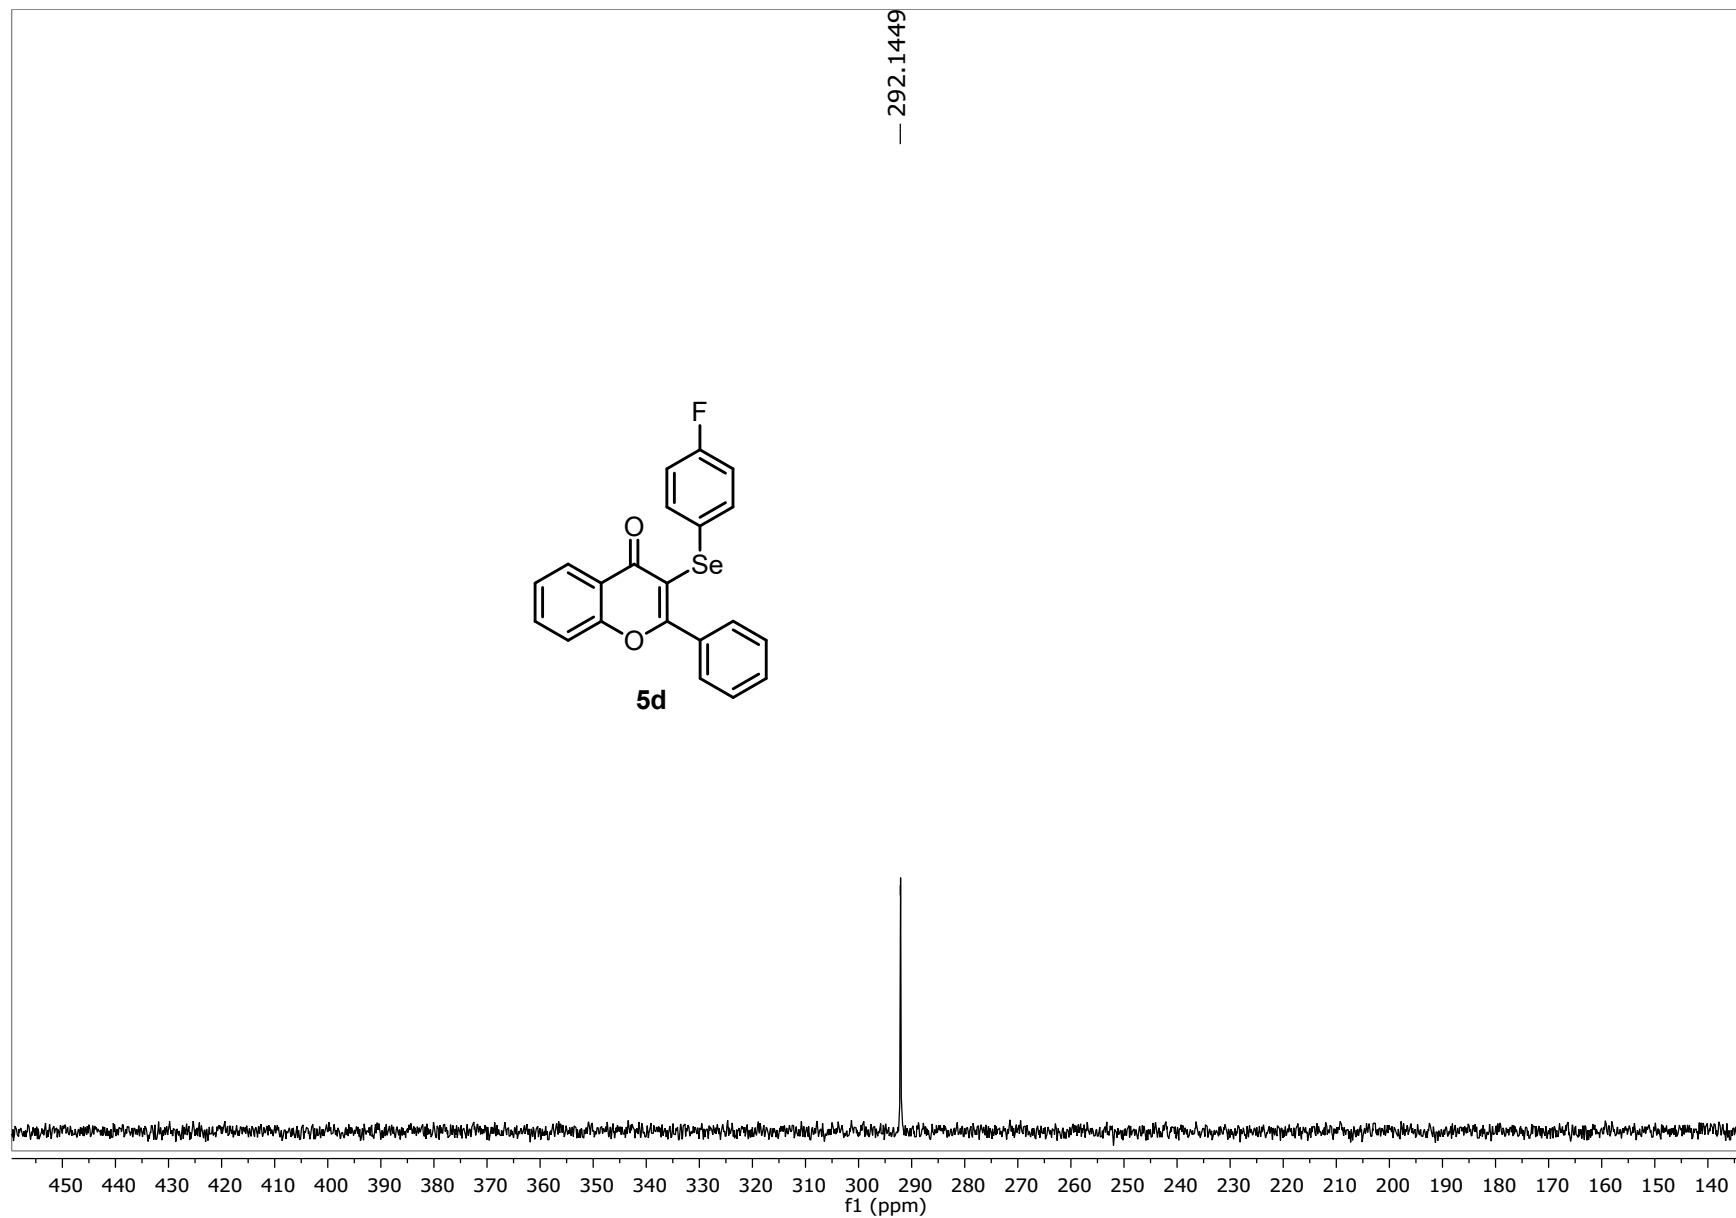

Figure S54:  $^{77}\text{Se}\{^1\text{H}\}$  NMR (76 MHz,  $\text{CDCl}_3$ ) spectrum of compound **5d**.

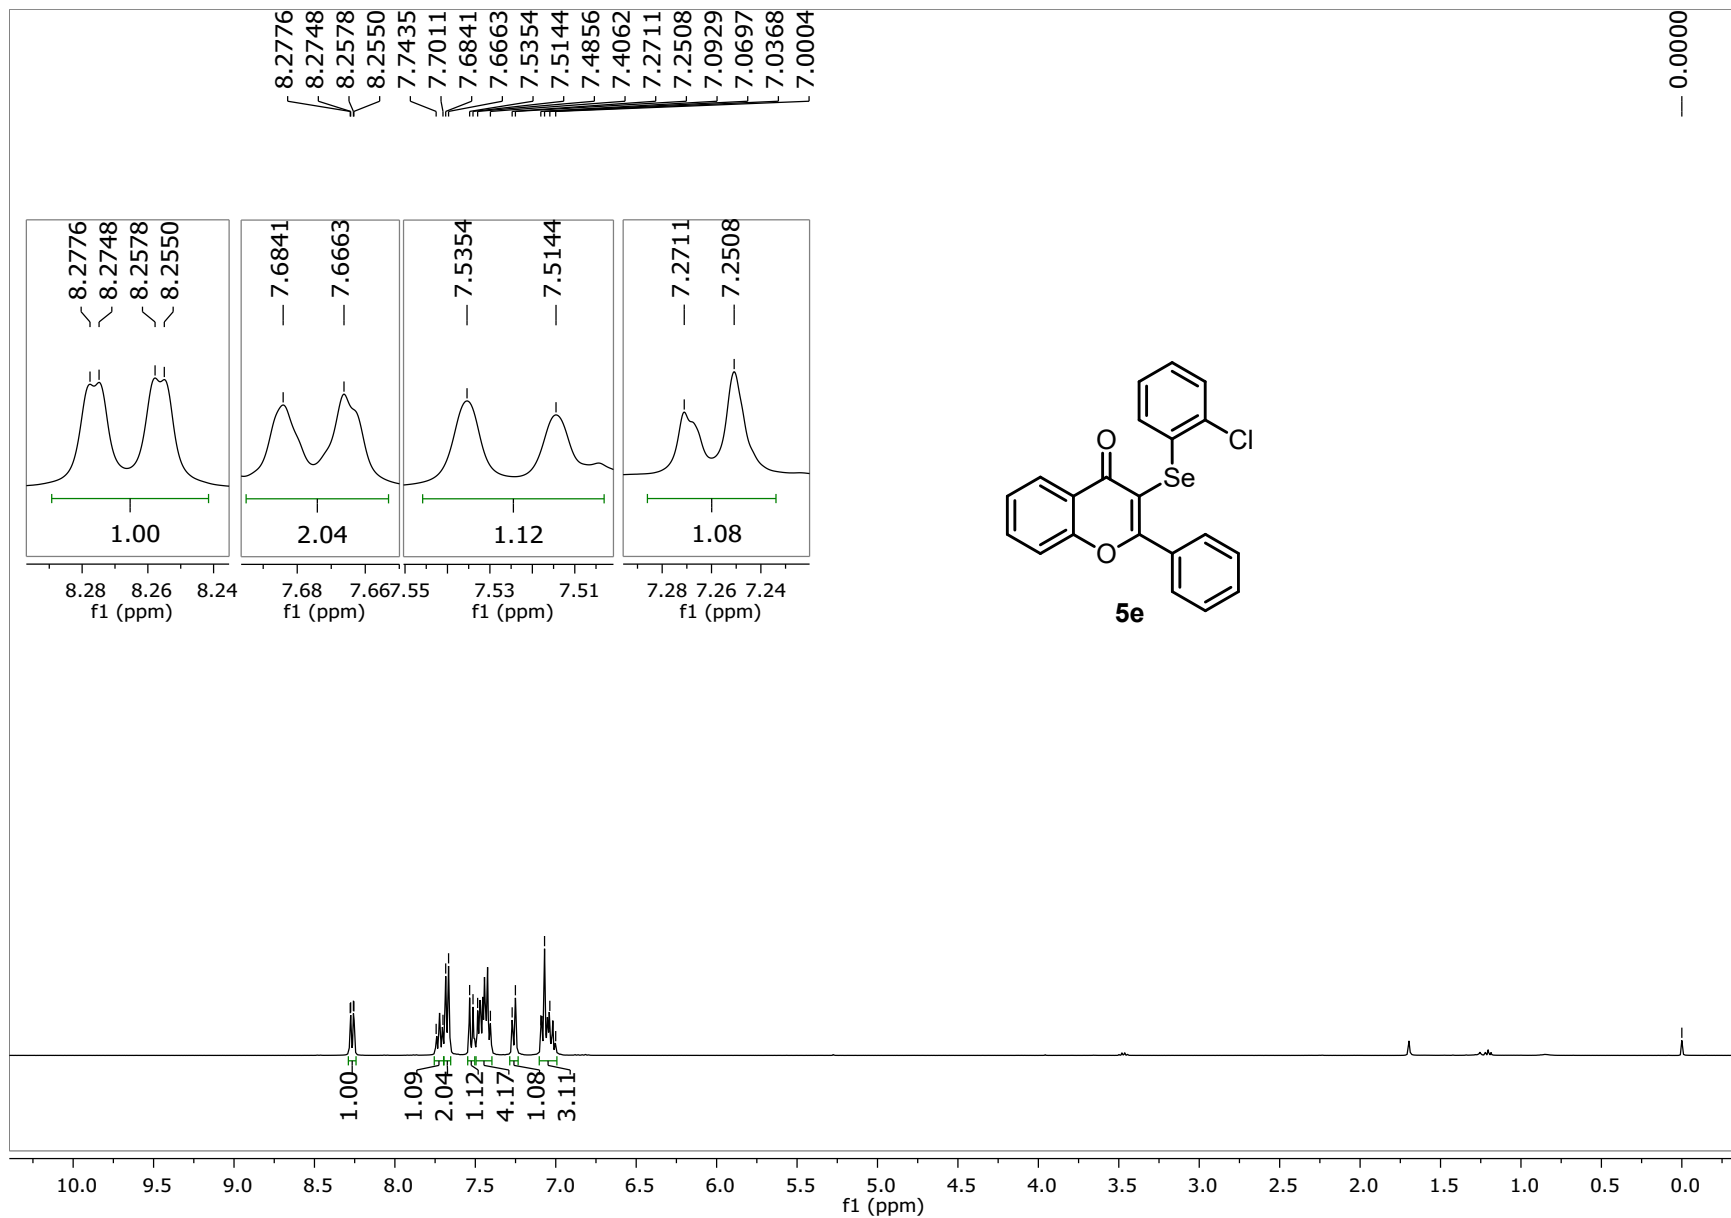

Figure S55: <sup>1</sup>H NMR (400 MHz, CDCl<sub>3</sub>) spectrum of compound **5e**.



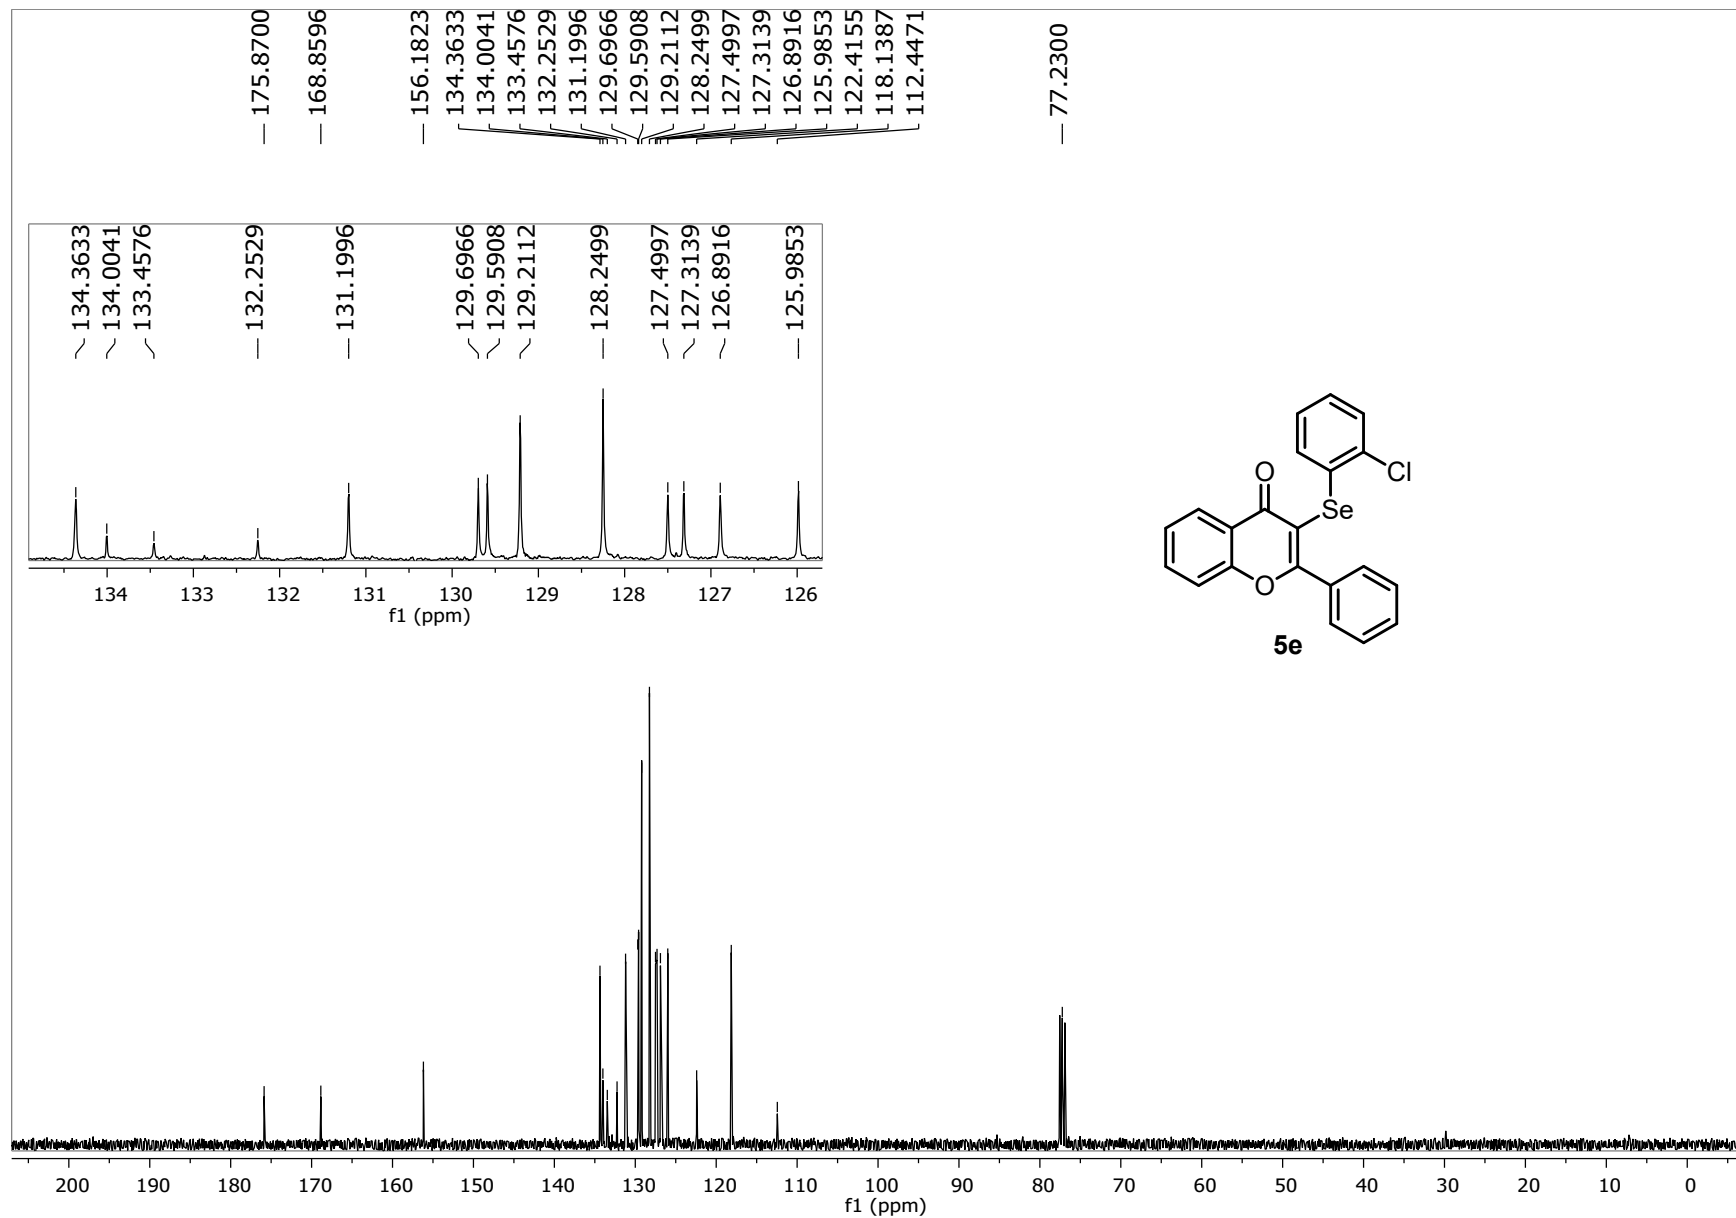

Figure S56:  $^{13}\text{C}\{^1\text{H}\}$  NMR (100 MHz,  $\text{CDCl}_3$ ) spectrum of compound **5e**.

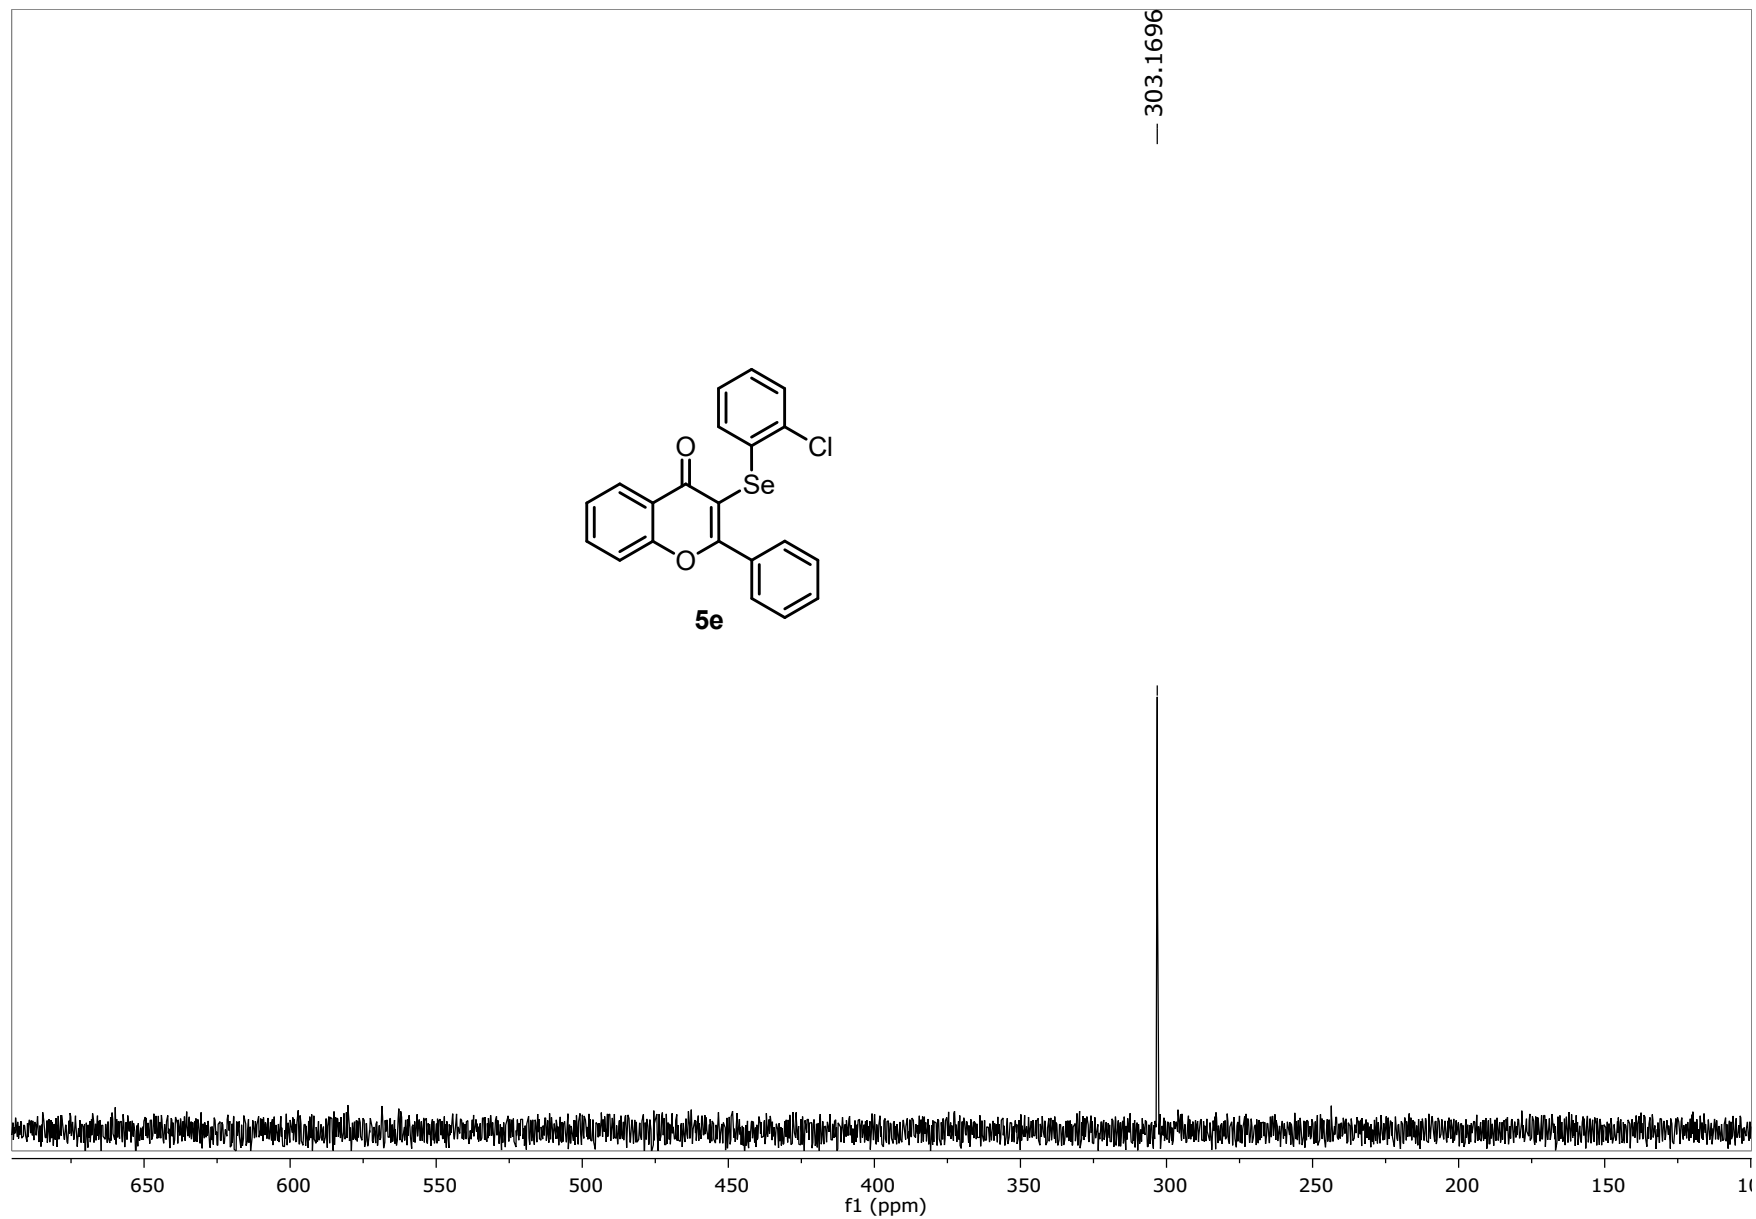

**Figure S57:**  $^{77}\text{Se}\{^1\text{H}\}$  NMR (76 MHz,  $\text{CDCl}_3$ ) spectrum of compound **5e**.

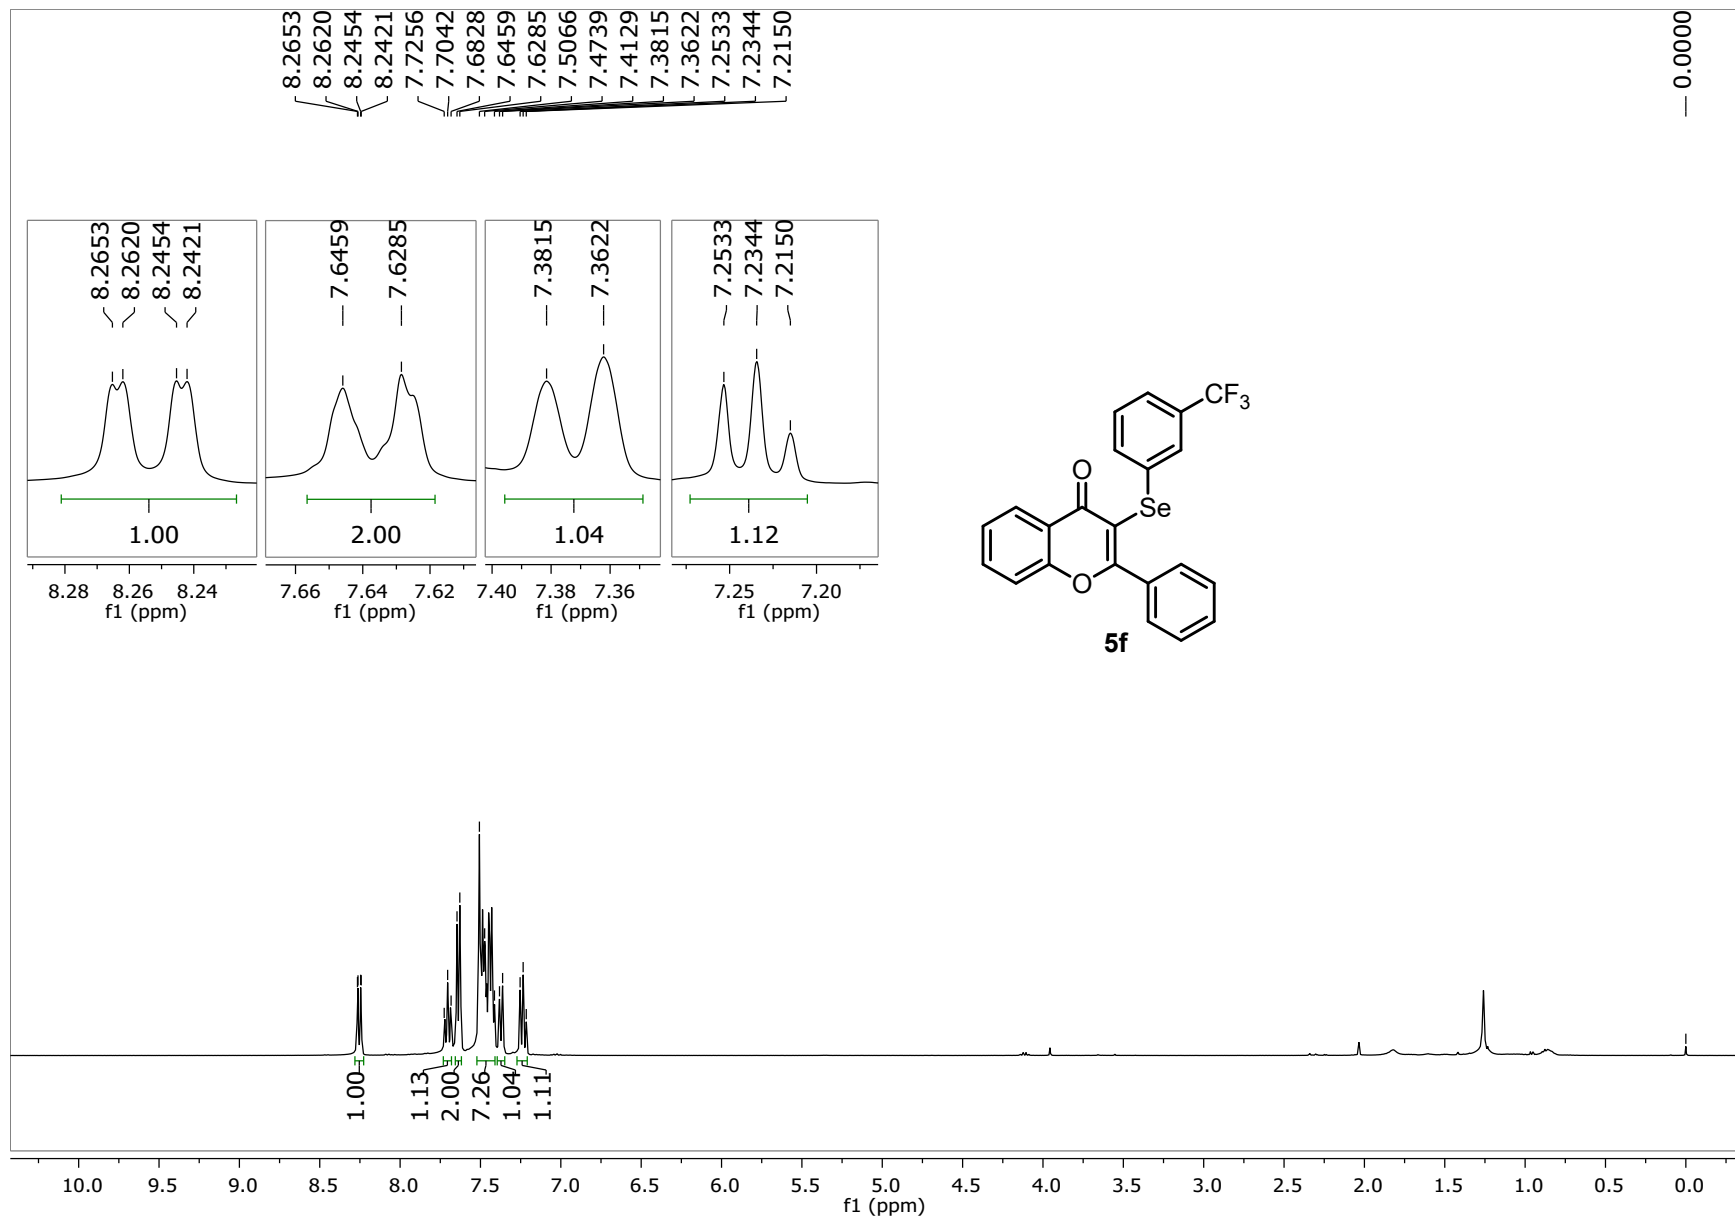

Figure S58: <sup>1</sup>H NMR (400 MHz, CDCl<sub>3</sub>) spectrum of compound **5e**.

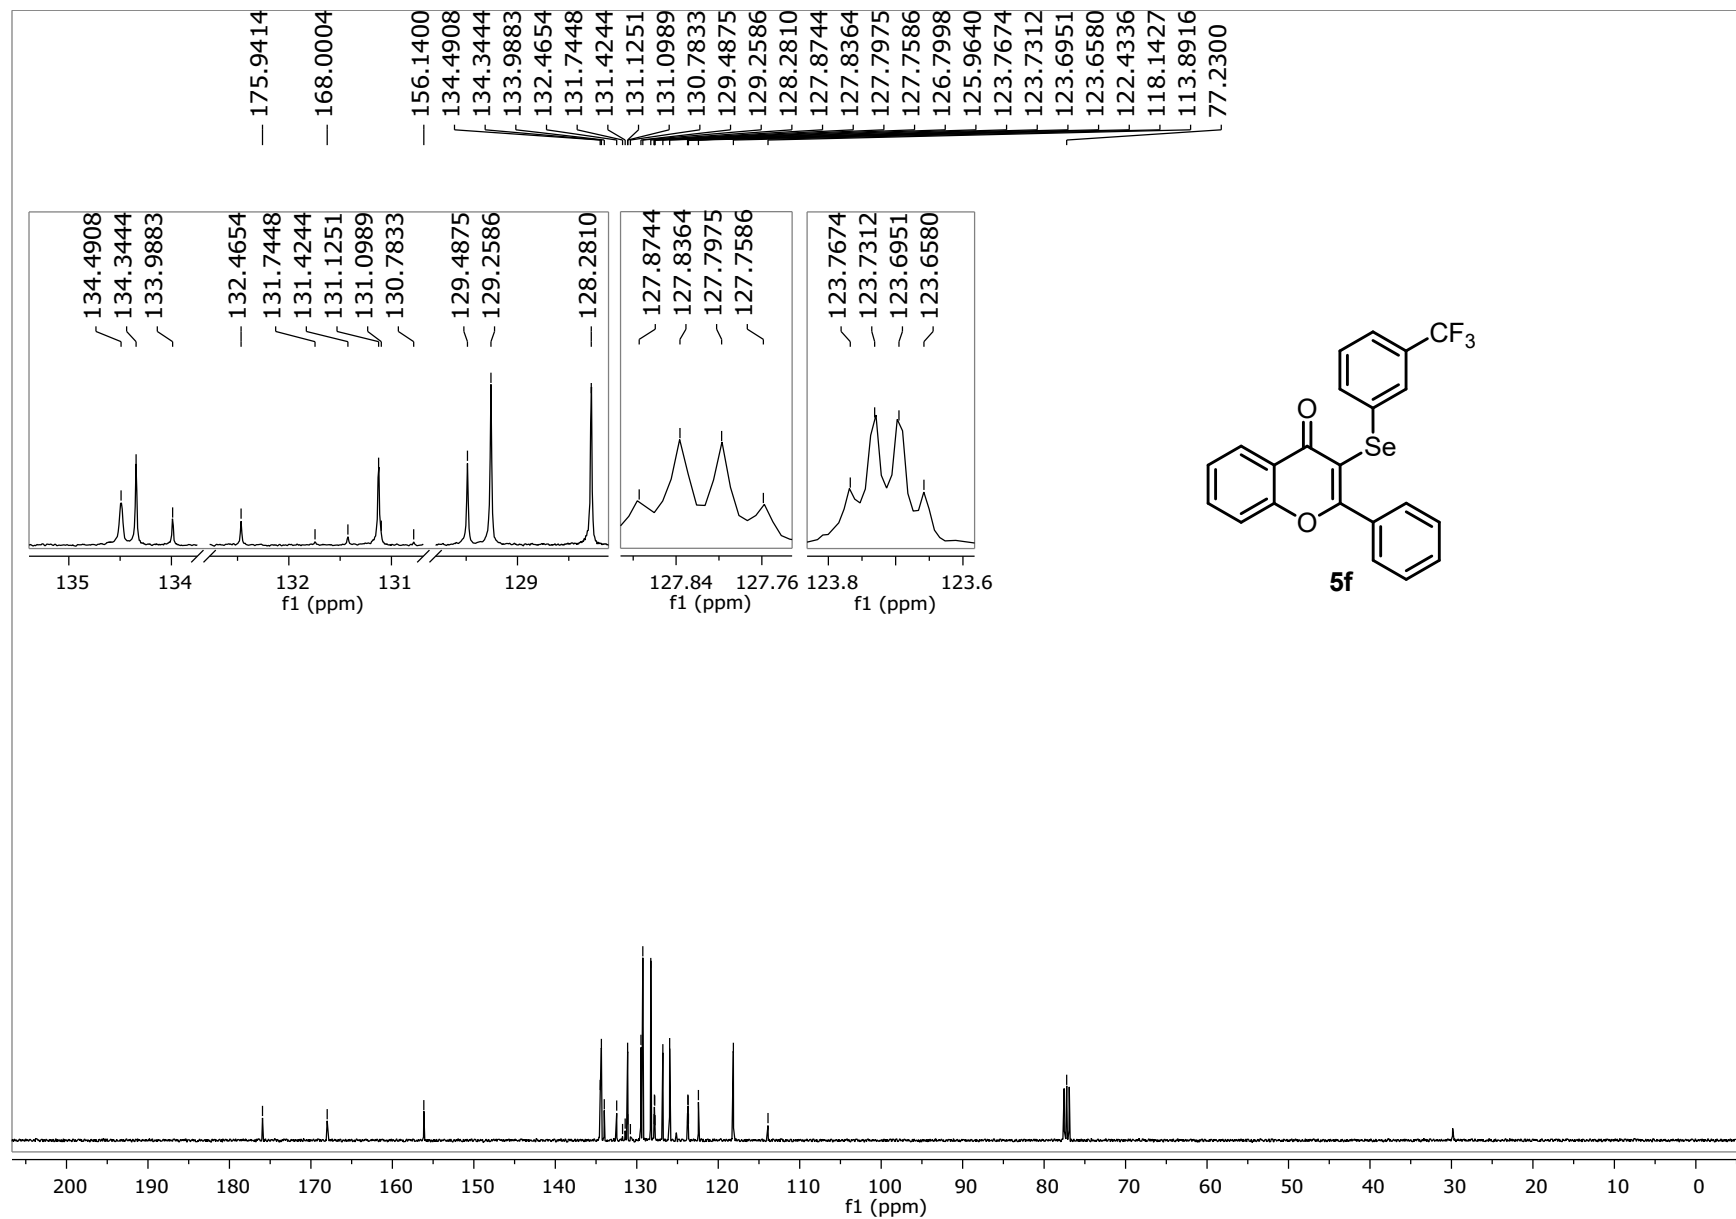

**Figure S59:**  $^{13}\text{C}\{^1\text{H}\}$  NMR (100 MHz,  $\text{CDCl}_3$ ) spectrum of compound **5f**.

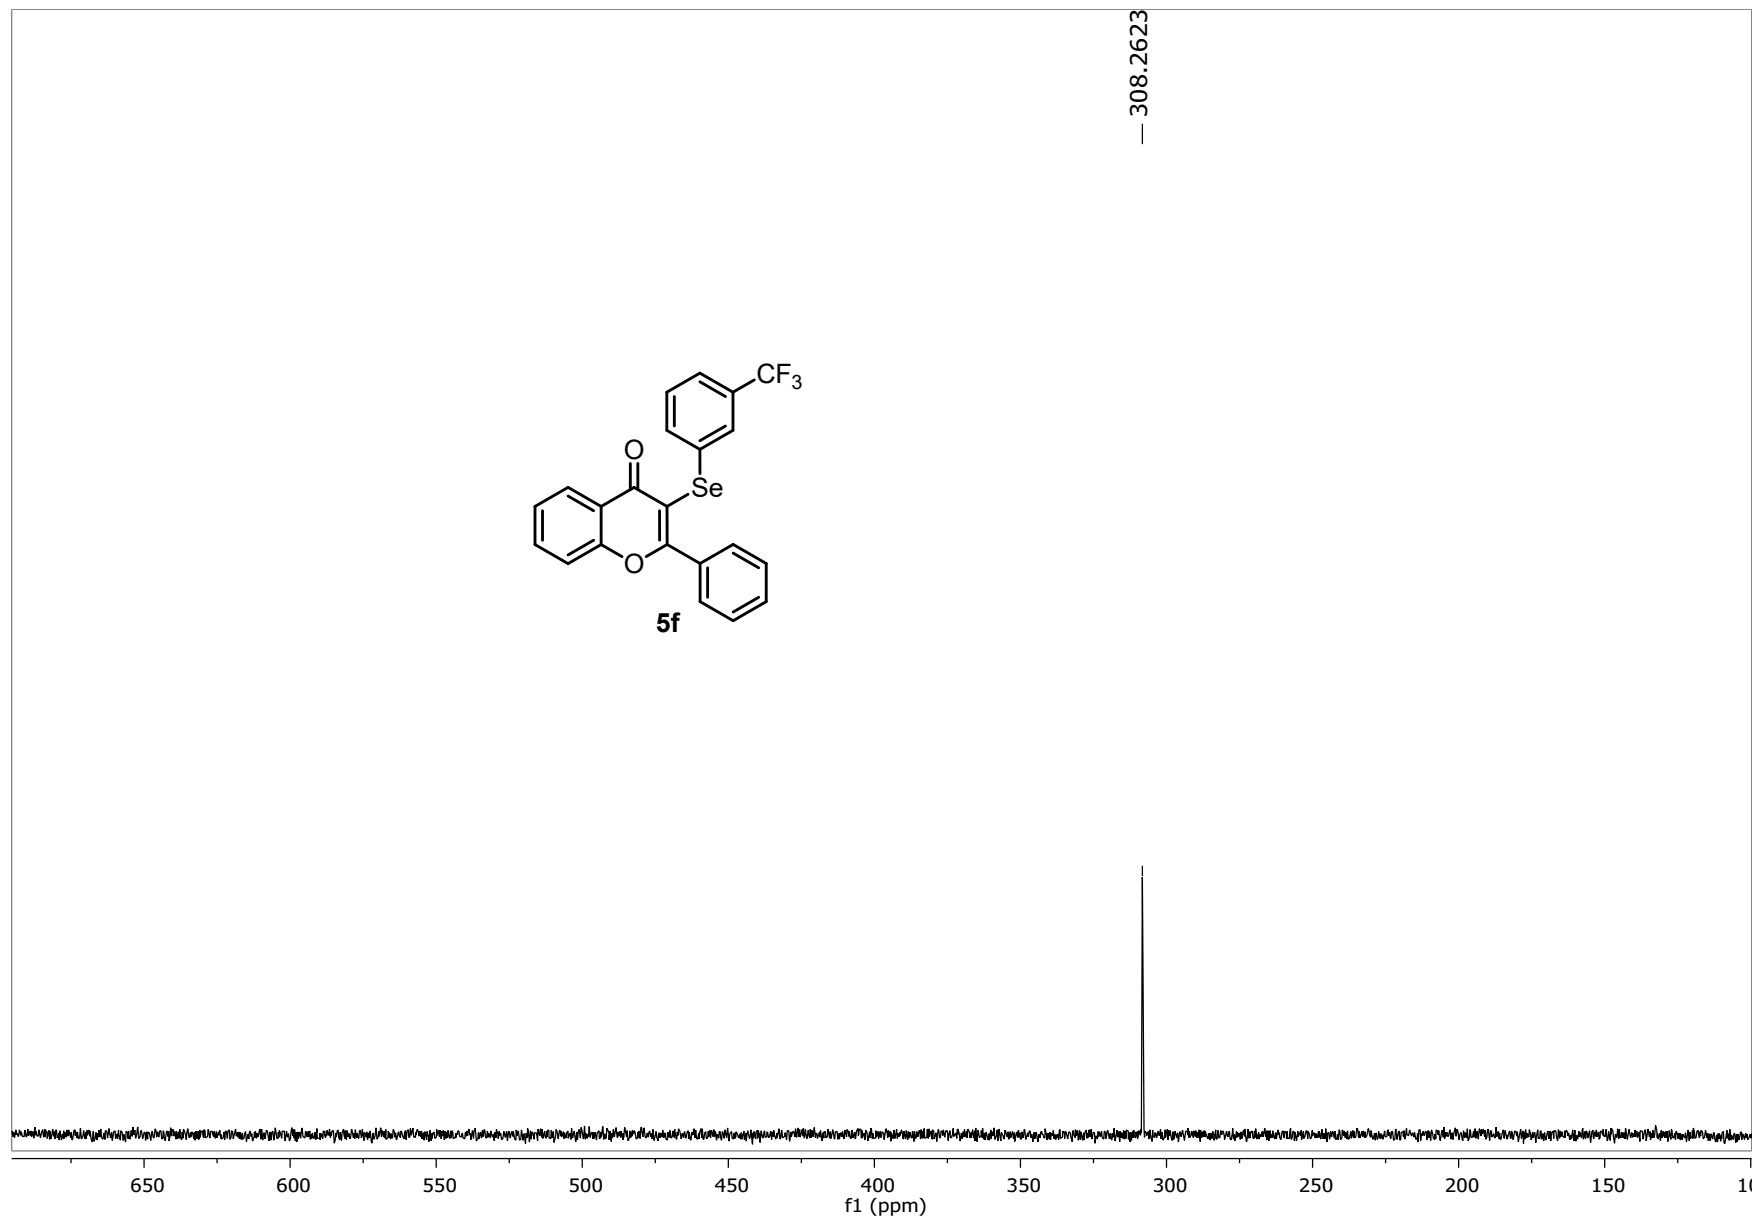

Figure S560:  $^{77}\text{Se}\{^1\text{H}\}$  NMR (76 MHz,  $\text{CDCl}_3$ ) spectrum of compound **5f**.

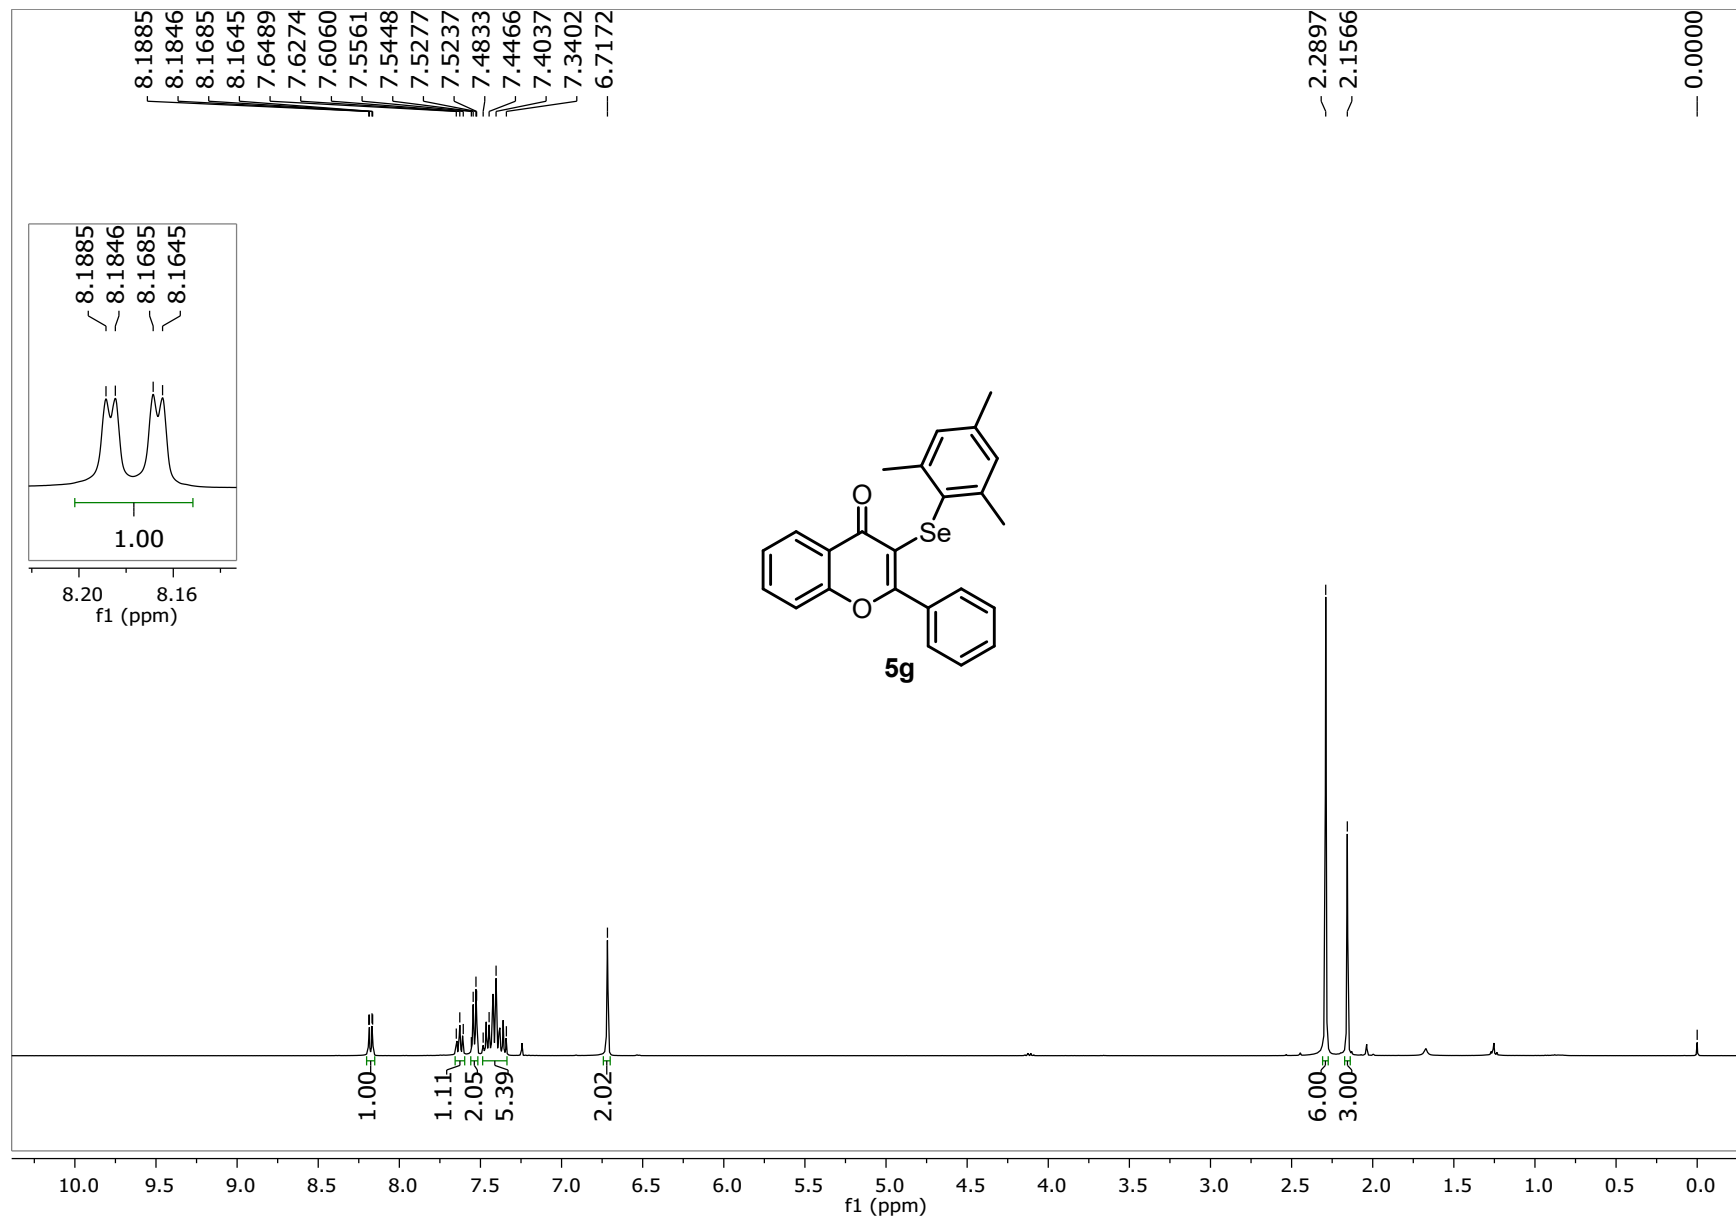

Figure S61:  $^1\text{H NMR}$  (400 MHz,  $\text{CDCl}_3$ ) spectrum of compound **5g**.

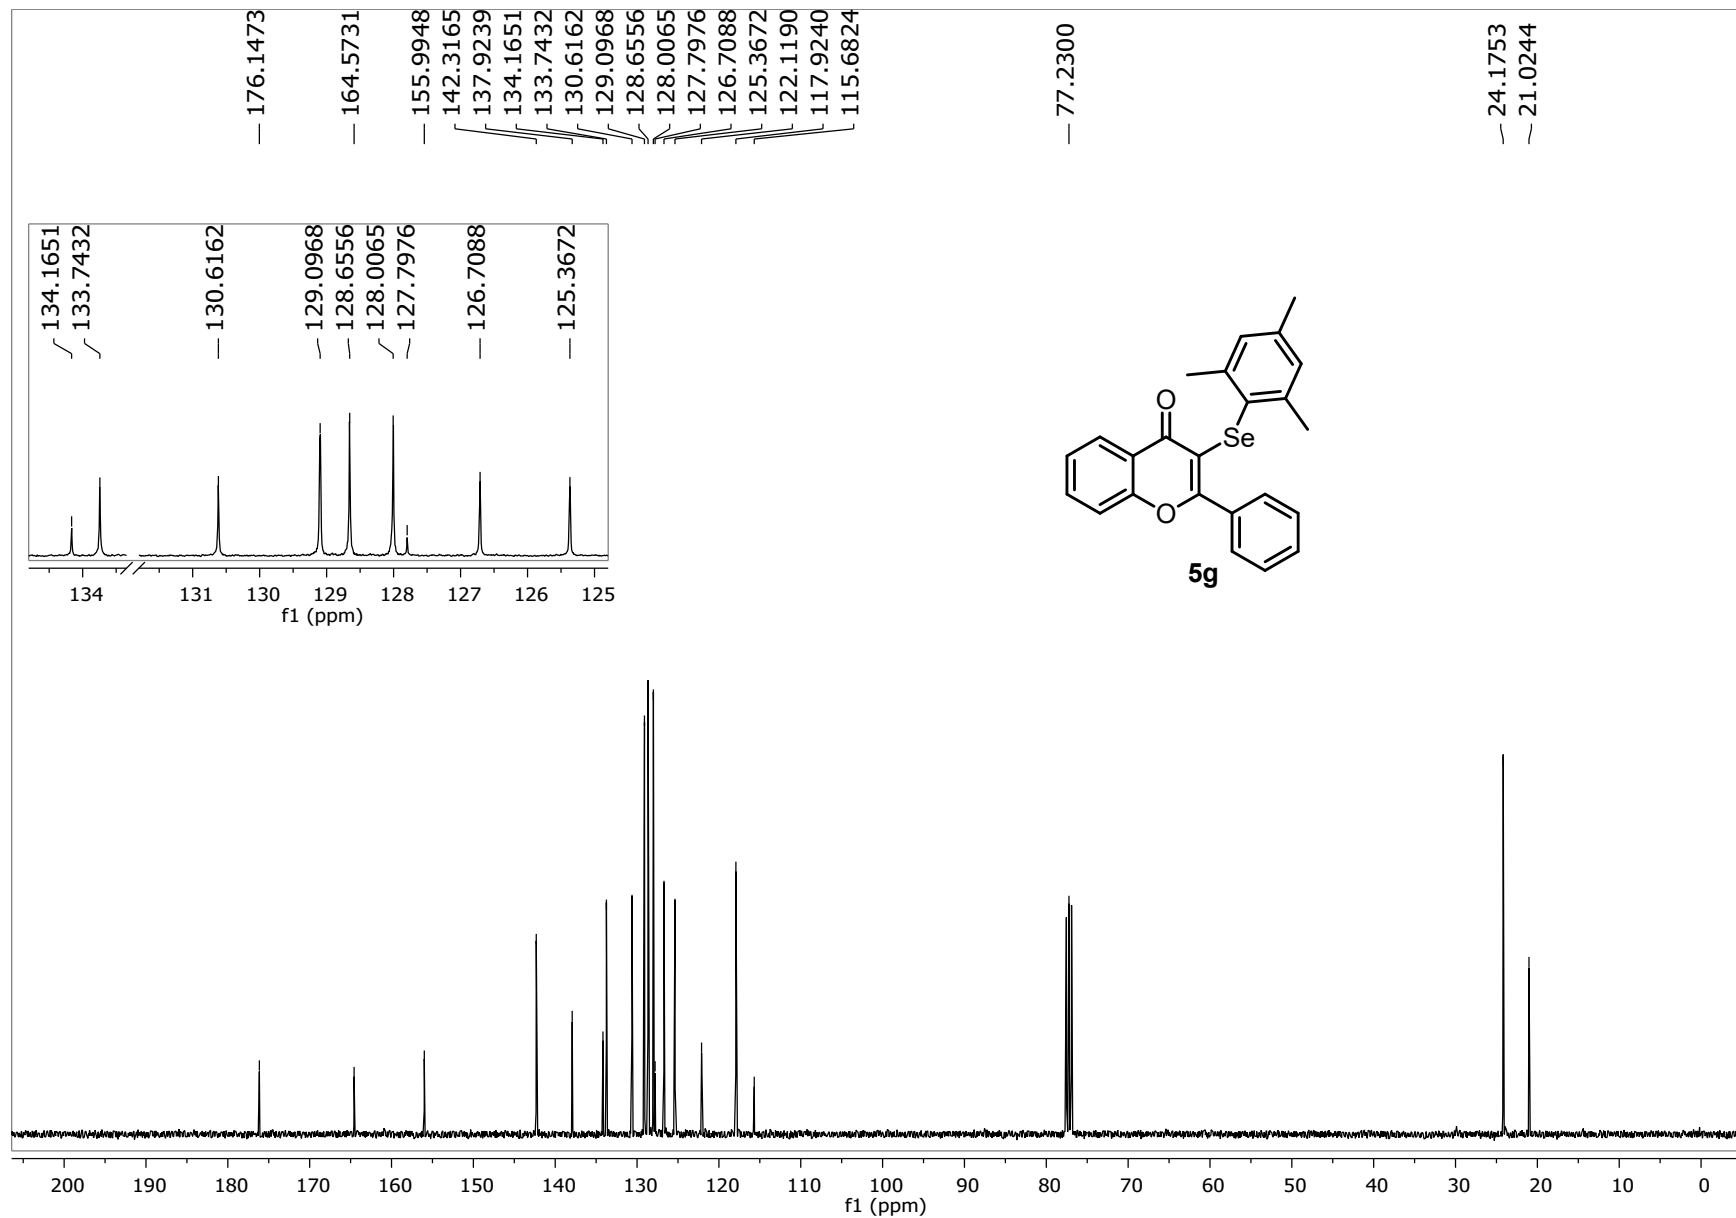

Figure S62: <sup>13</sup>C{<sup>1</sup>H} NMR (100 MHz, CDCl<sub>3</sub>) spectrum of compound **5g**.

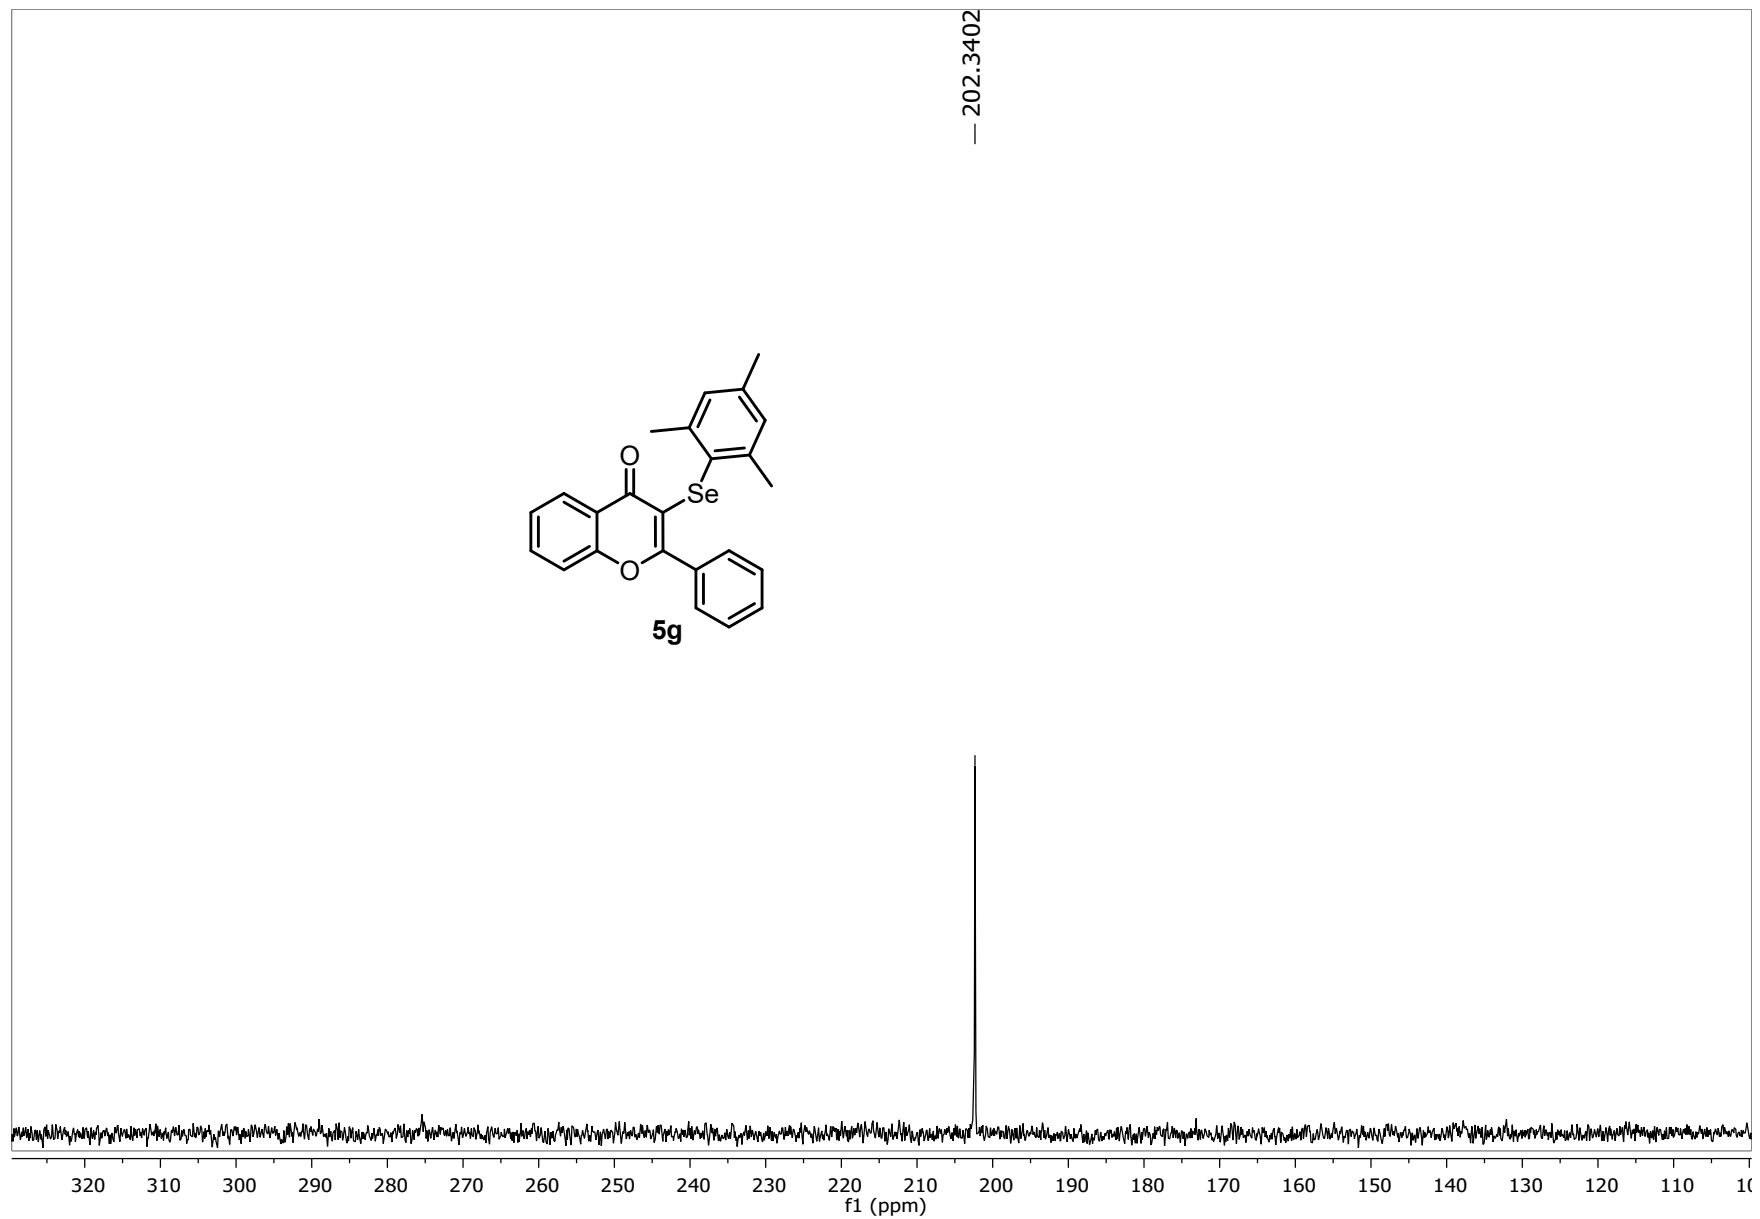

Figure S563:  $^{77}\text{Se}\{^1\text{H}\}$  NMR (76 MHz,  $\text{CDCl}_3$ ) spectrum of compound **5g**.



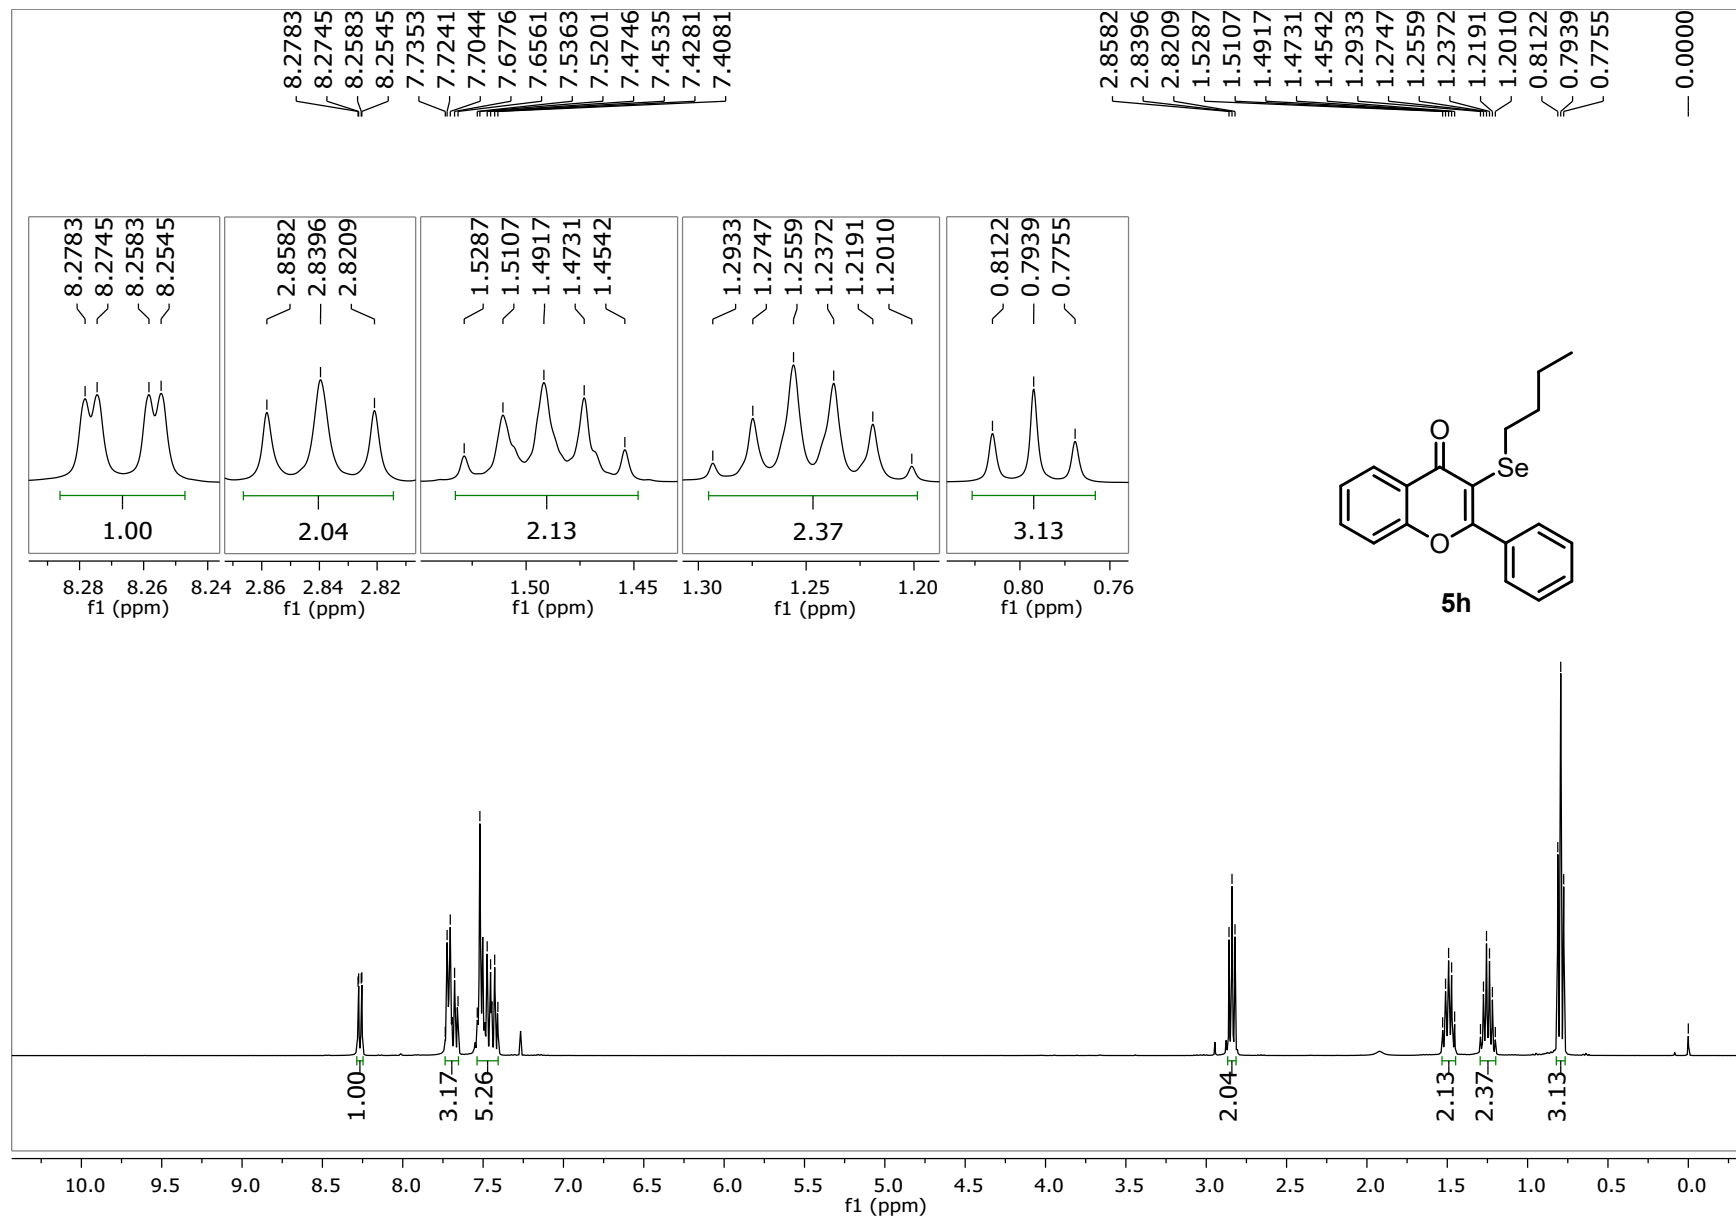

Figure S64:  $^1\text{H}$  NMR (400 MHz,  $\text{CDCl}_3$ ) spectrum of compound **5h**.

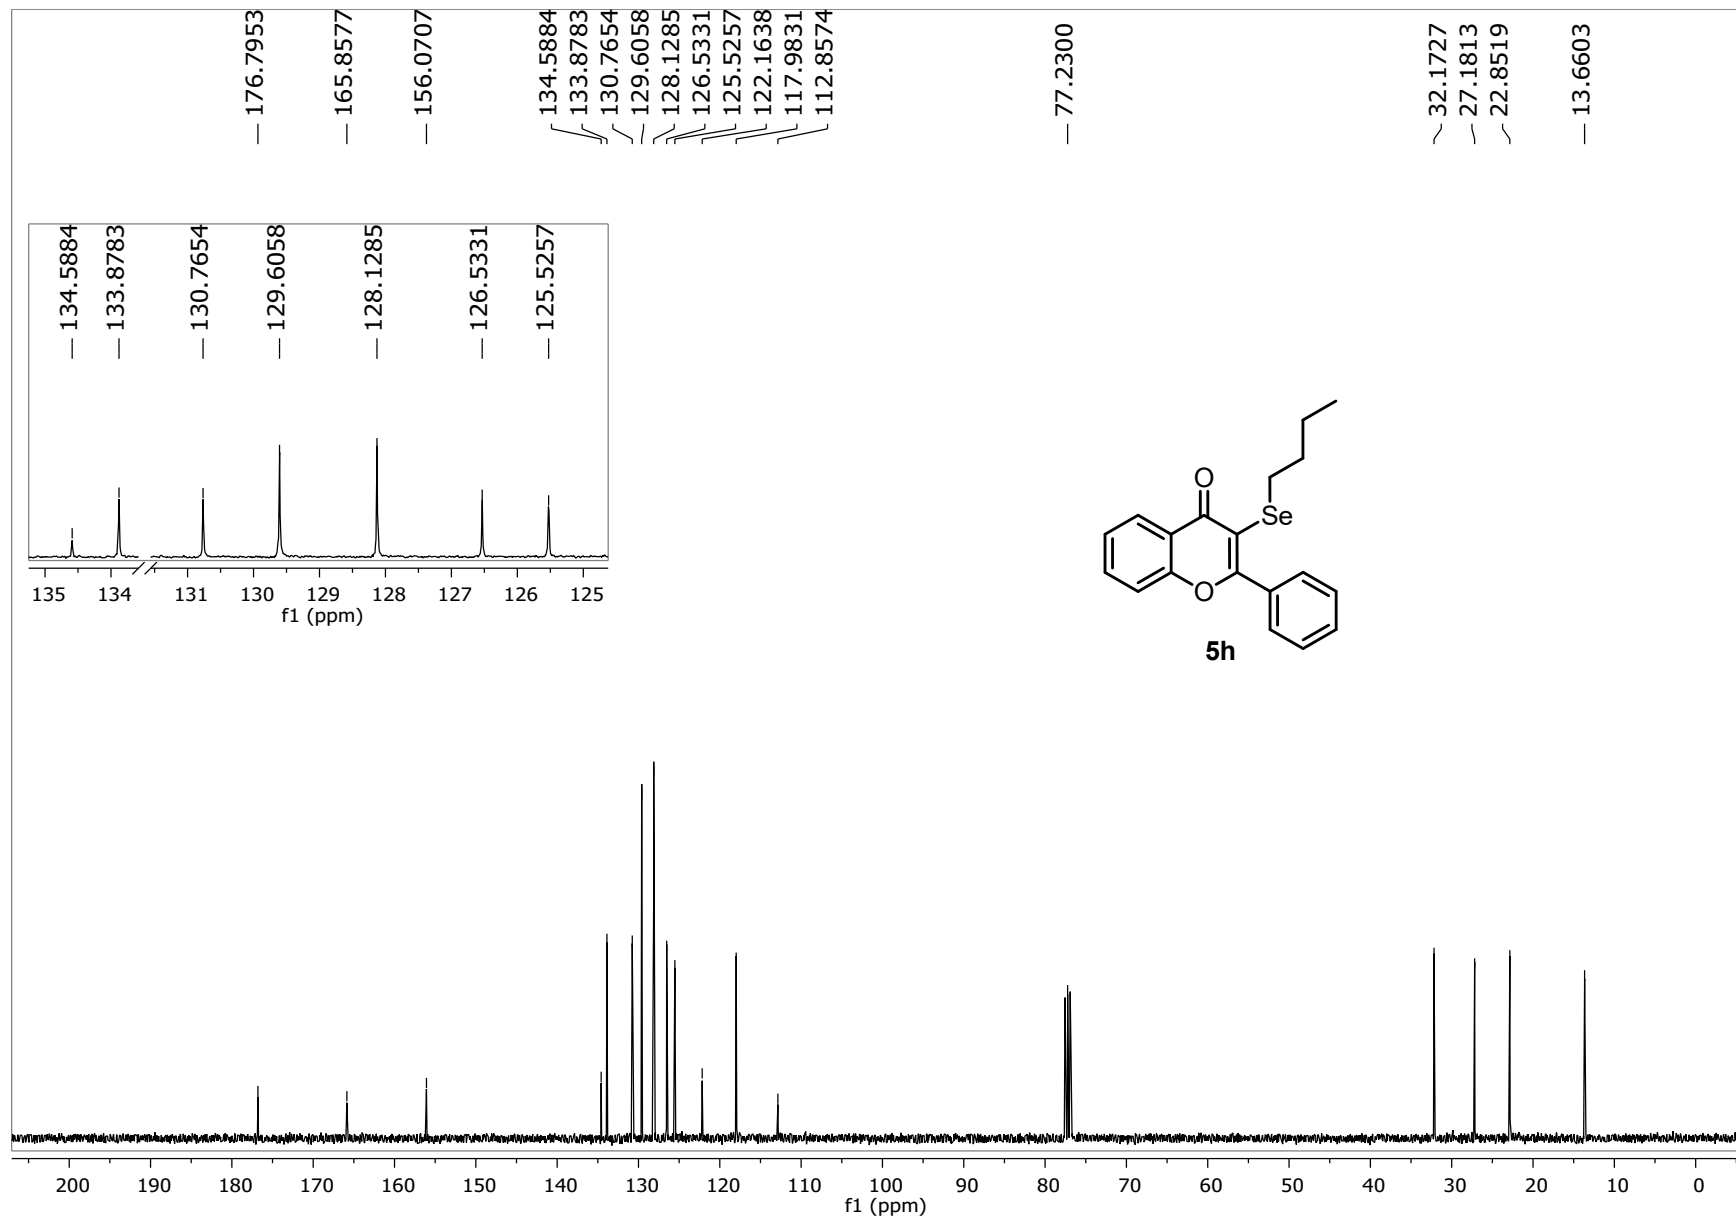

Figure S65: <sup>13</sup>C{<sup>1</sup>H} NMR (100 MHz, CDCl<sub>3</sub>) spectrum of compound **5h**.

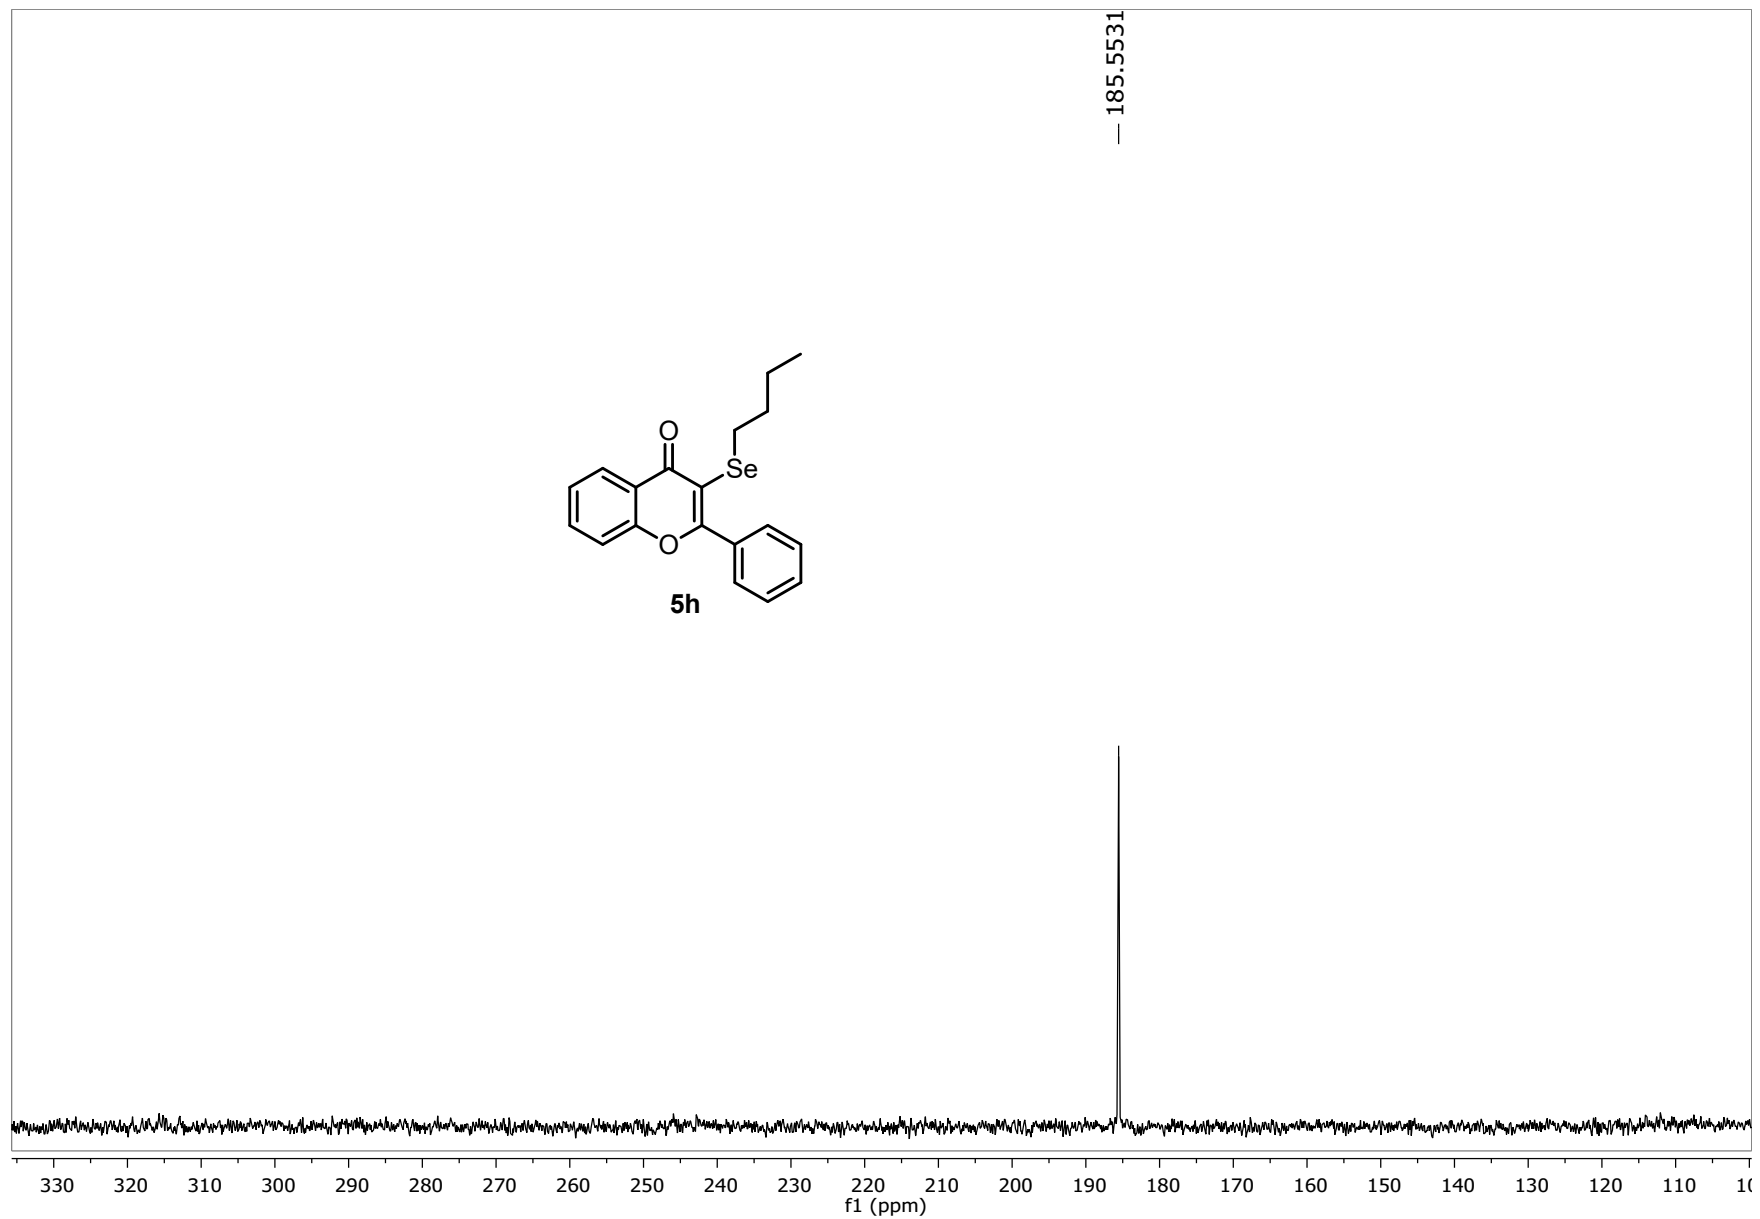

Figure S66:  $^{77}\text{Se}\{^1\text{H}\}$  NMR (76 MHz,  $\text{CDCl}_3$ ) spectrum of compound **5h**.

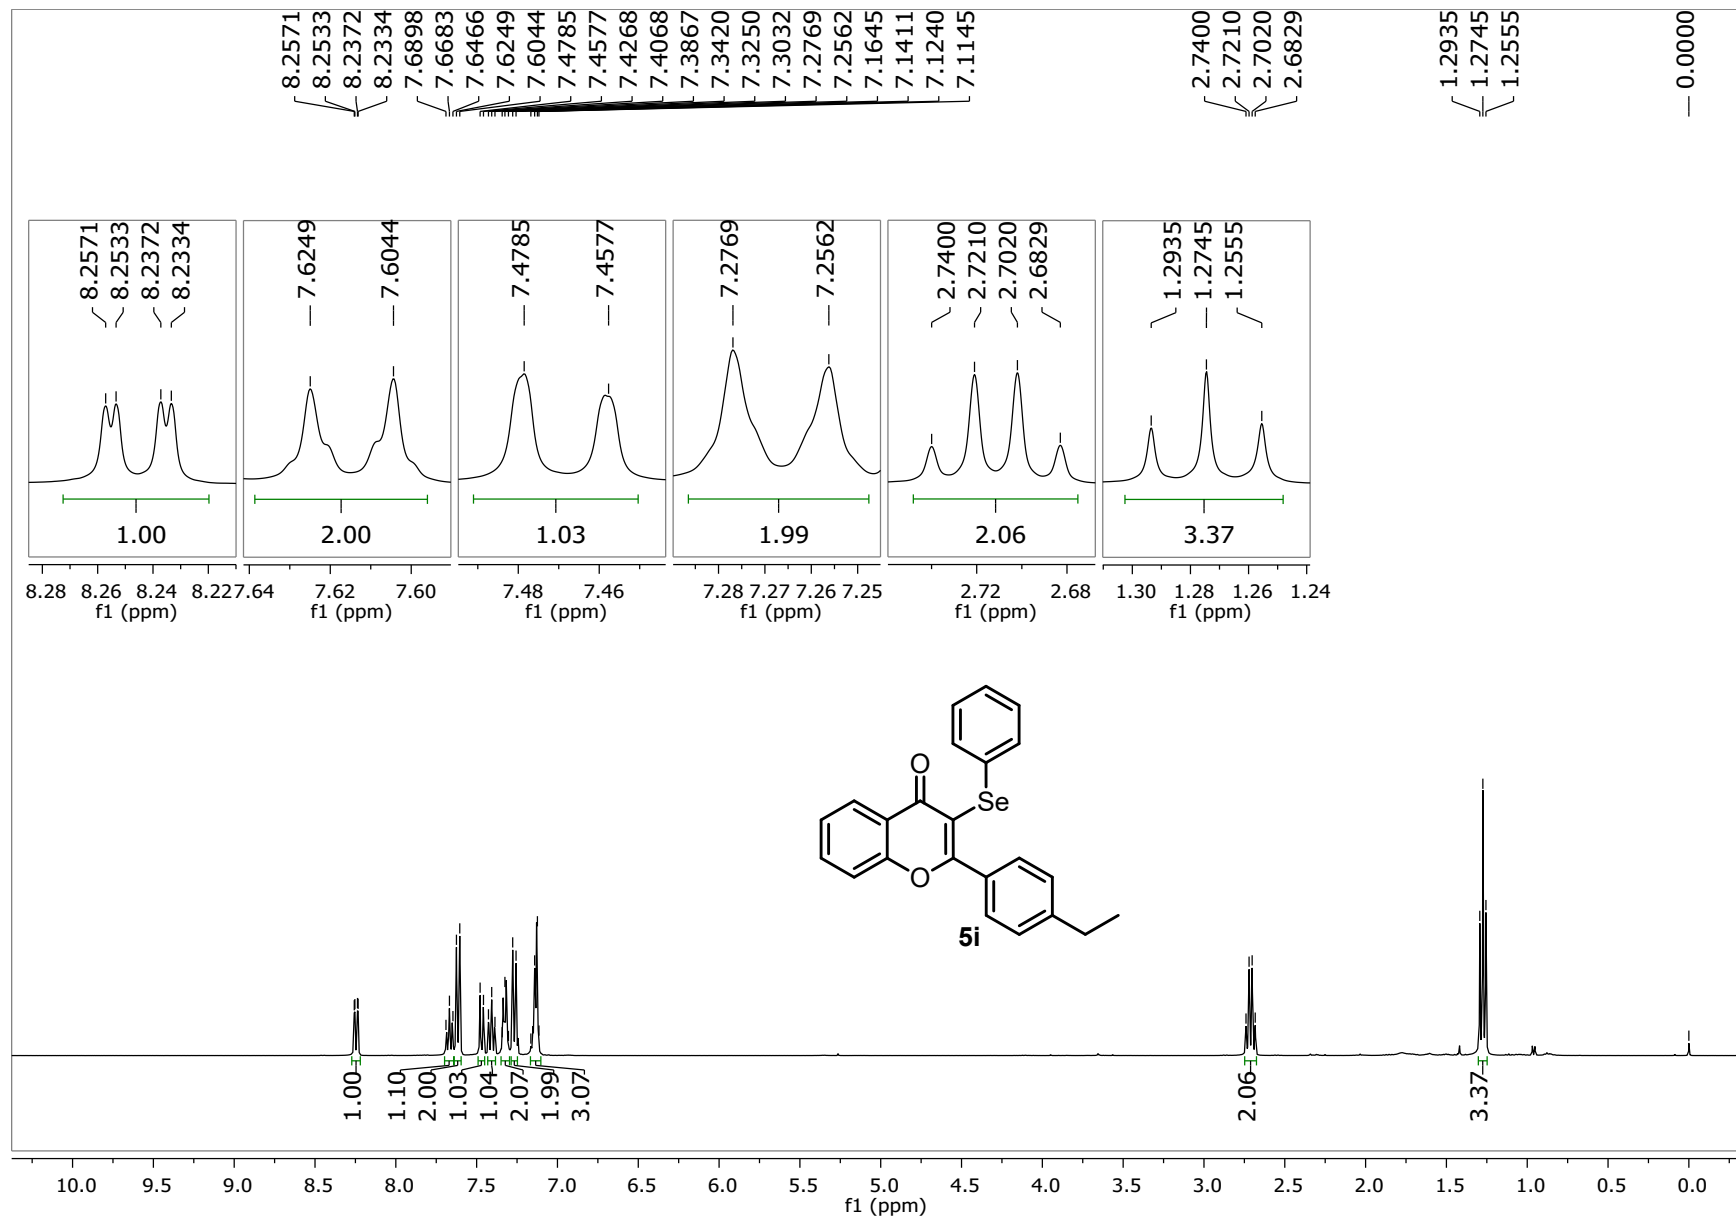

Figure S67:  $^1\text{H}$  NMR (400 MHz,  $\text{CDCl}_3$ ) spectrum of compound **5i**.

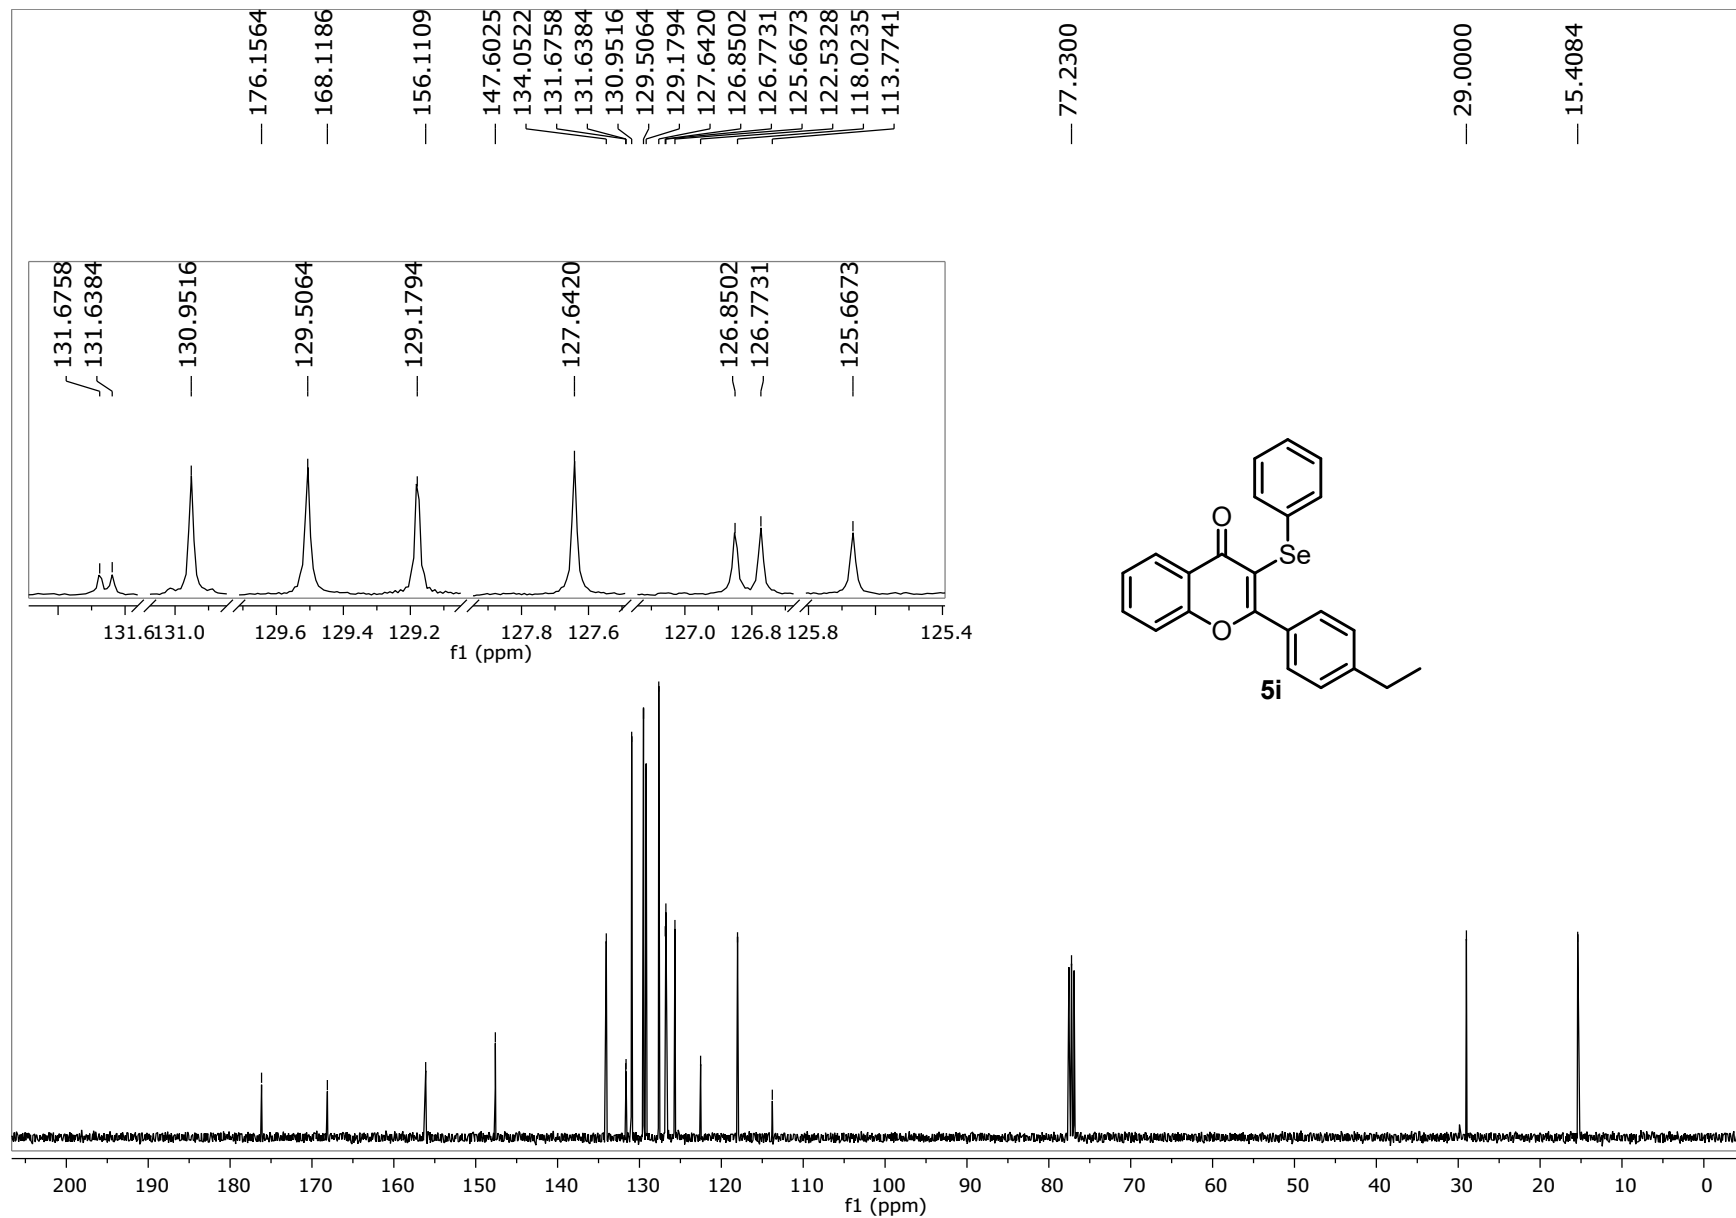

Figure S68:  $^{13}\text{C}\{^1\text{H}\}$  NMR (100 MHz,  $\text{CDCl}_3$ ) spectrum of compound **5i**.

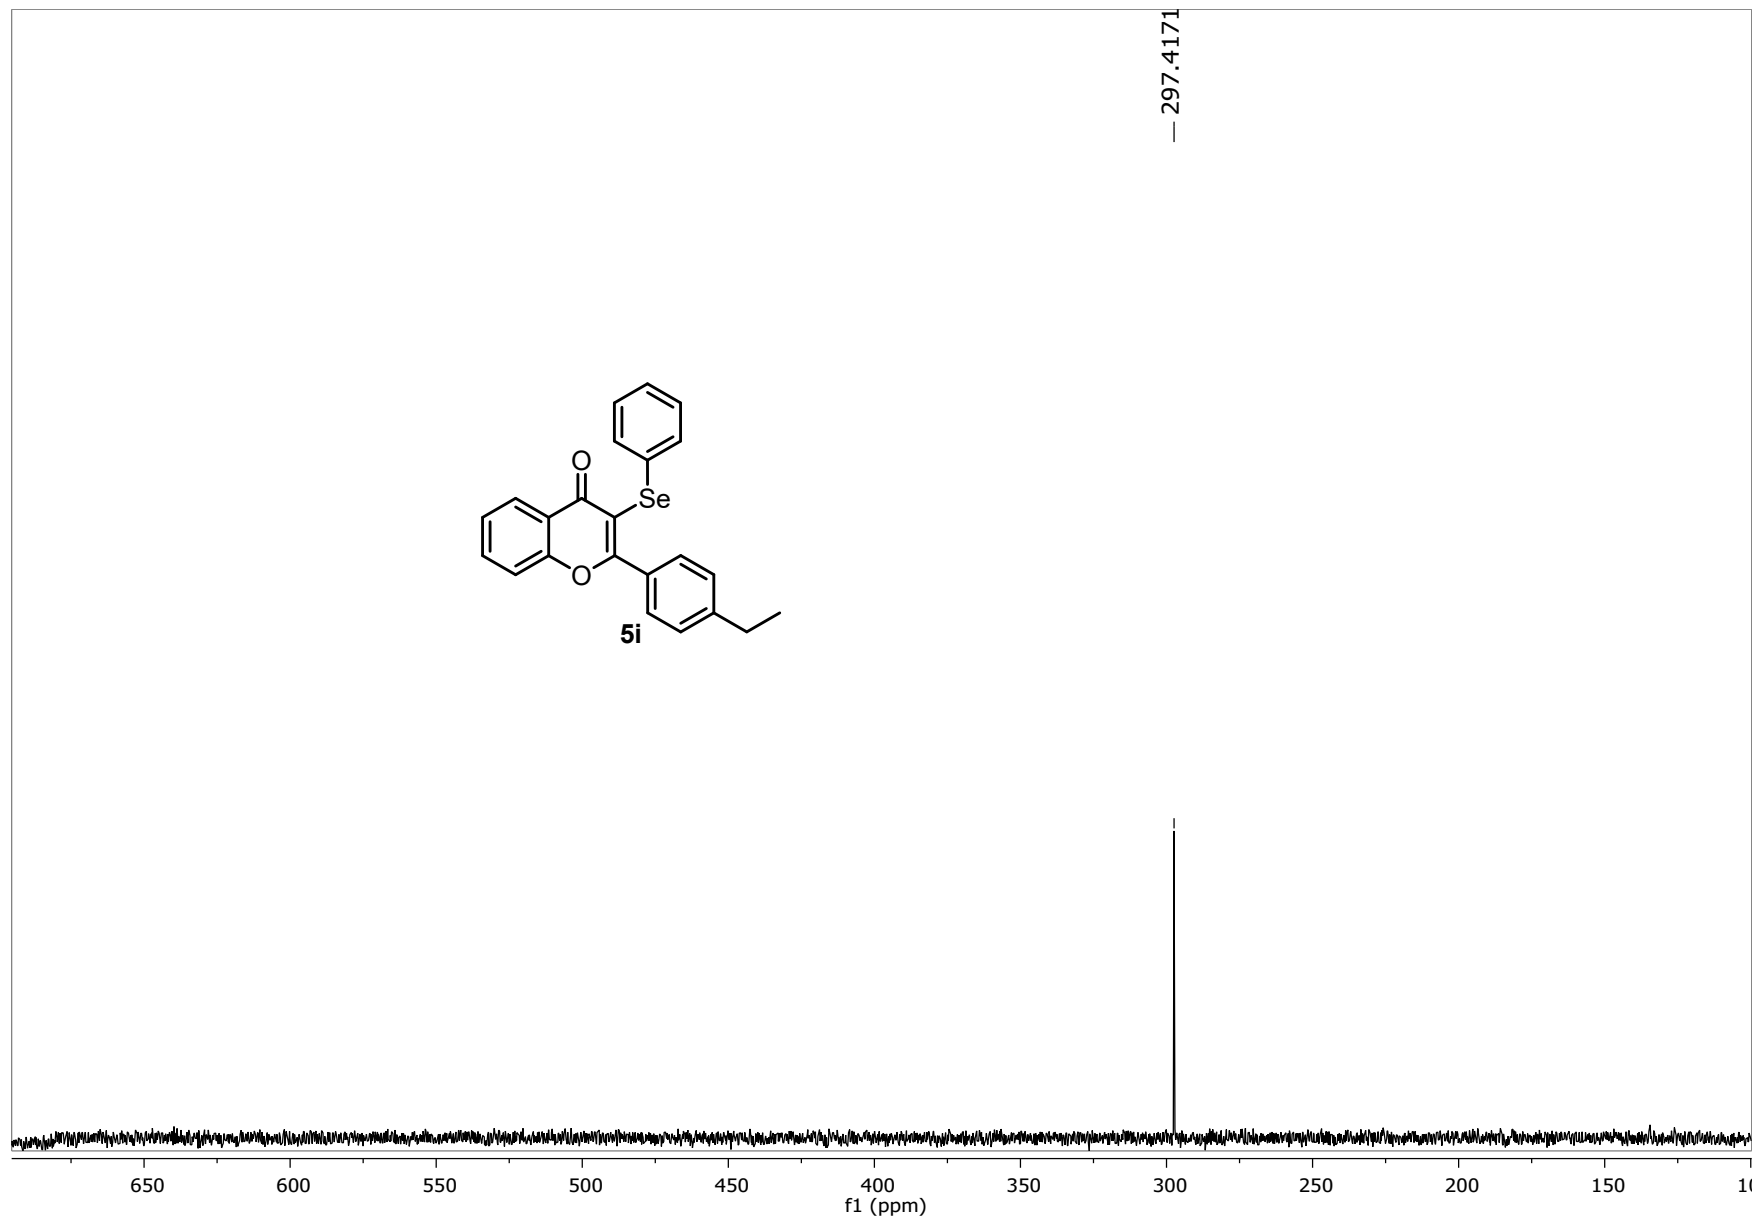

Figure S69:  $^{77}\text{Se}\{^1\text{H}\}$  NMR (76 MHz,  $\text{CDCl}_3$ ) spectrum of compound **5i**.

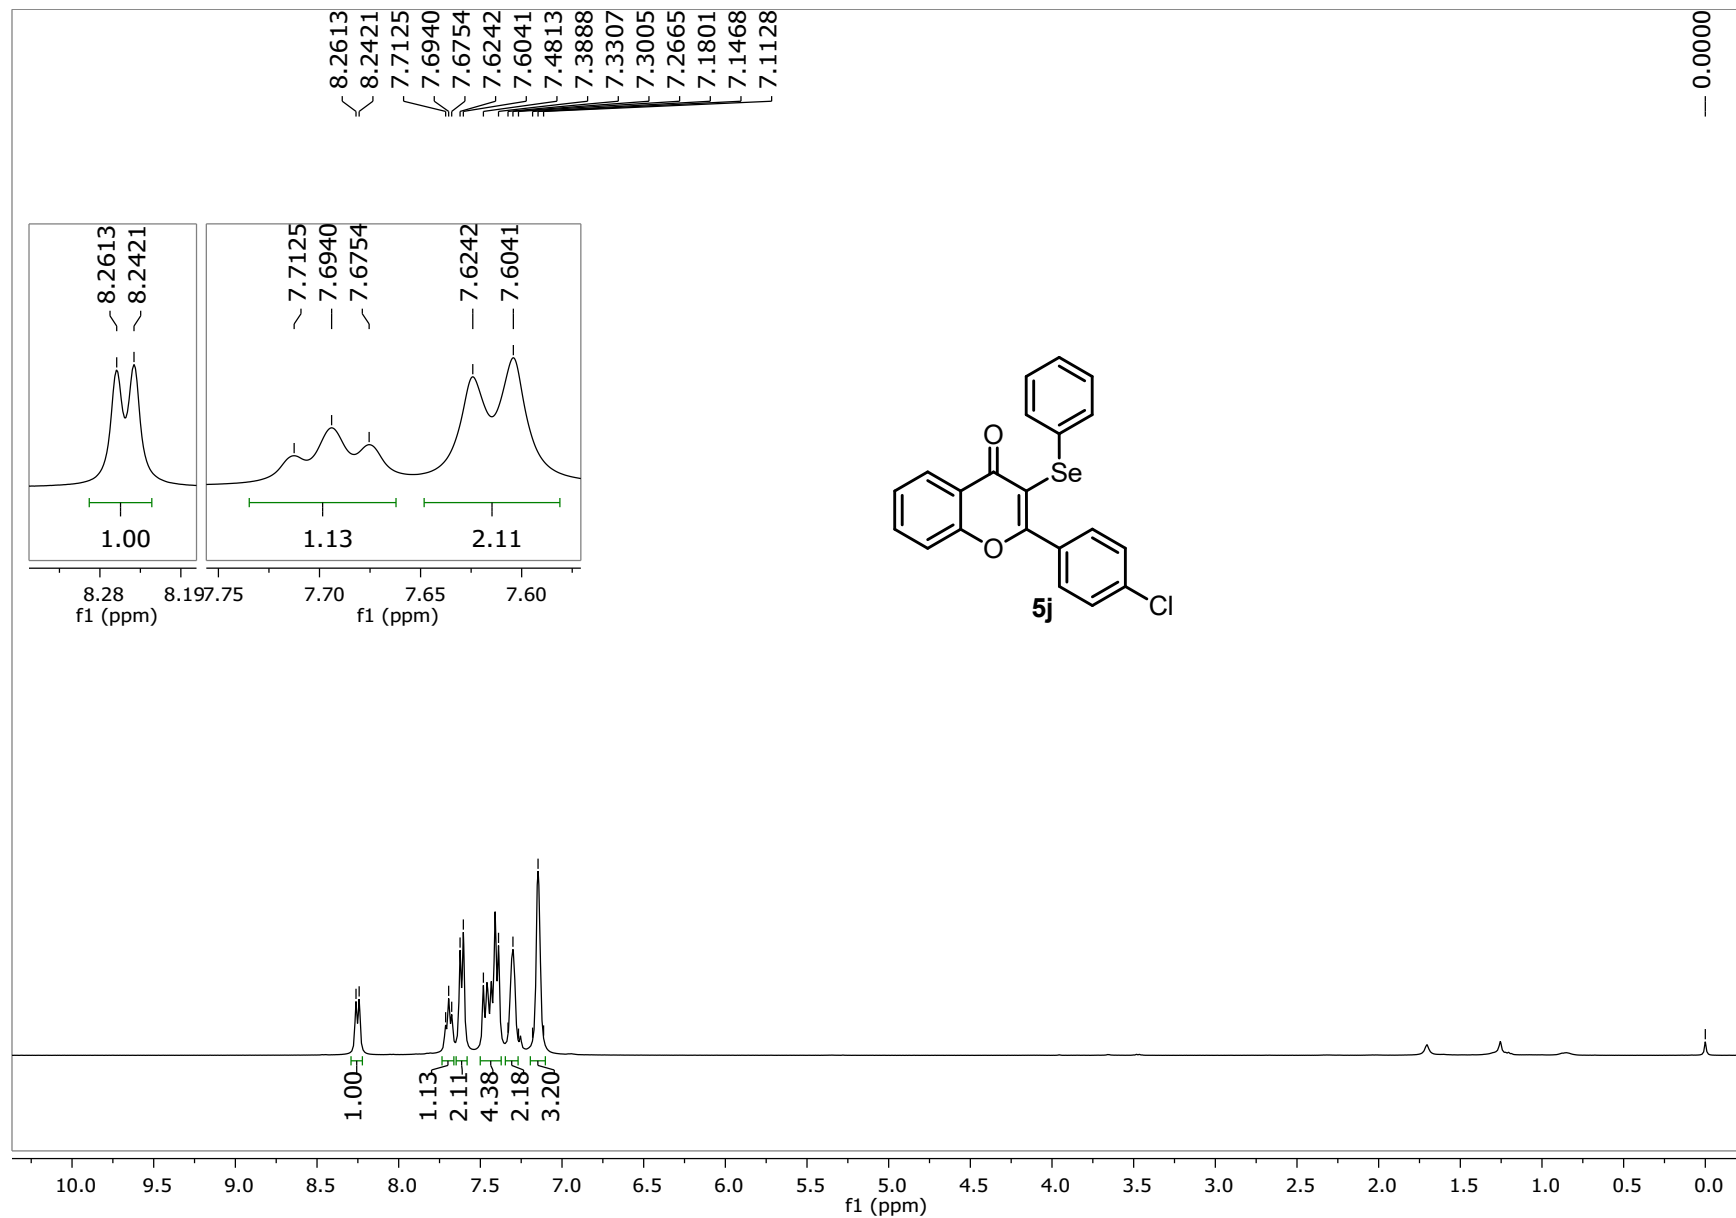

Figure S70:  $^1\text{H}$  NMR (400 MHz,  $\text{CDCl}_3$ ) spectrum of compound **5j**.

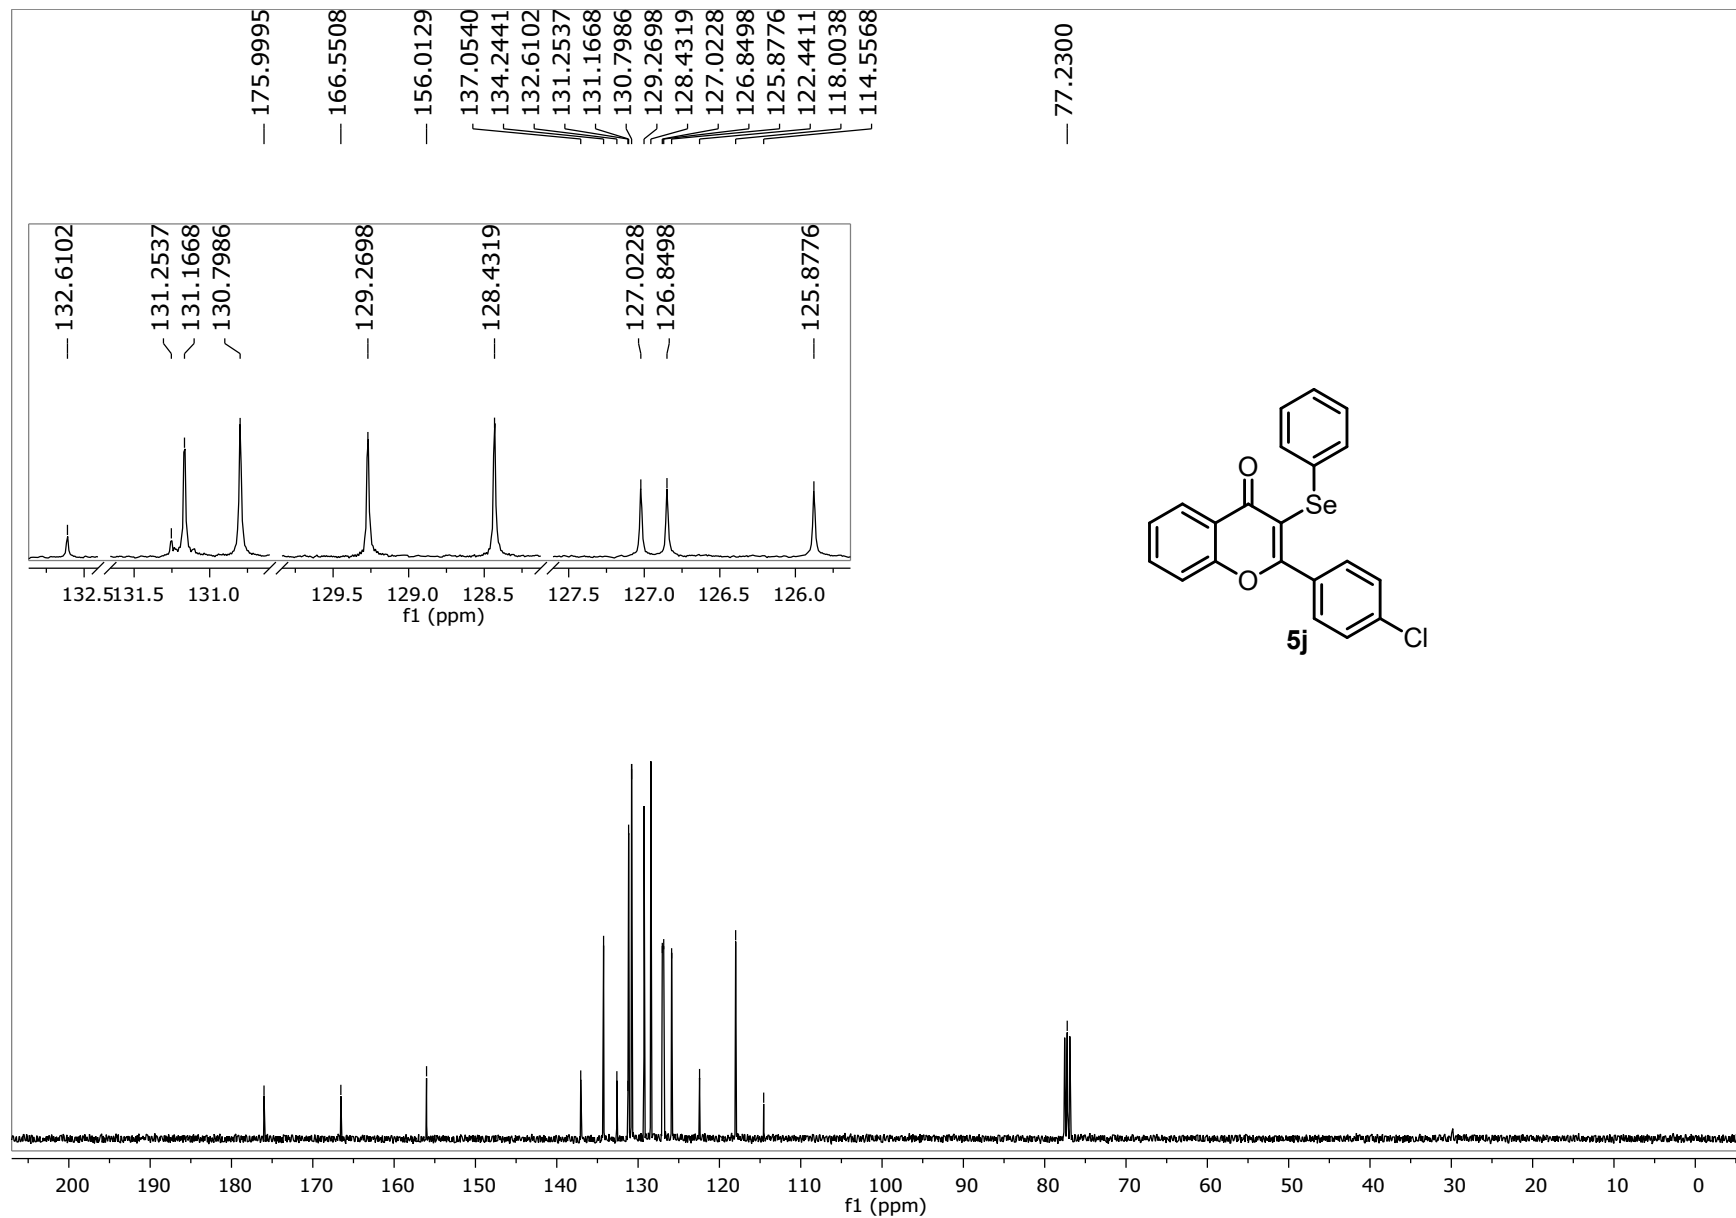

Figure S71:  $^{13}\text{C}\{^1\text{H}\}$  NMR (100 MHz,  $\text{CDCl}_3$ ) spectrum of compound **5j**.



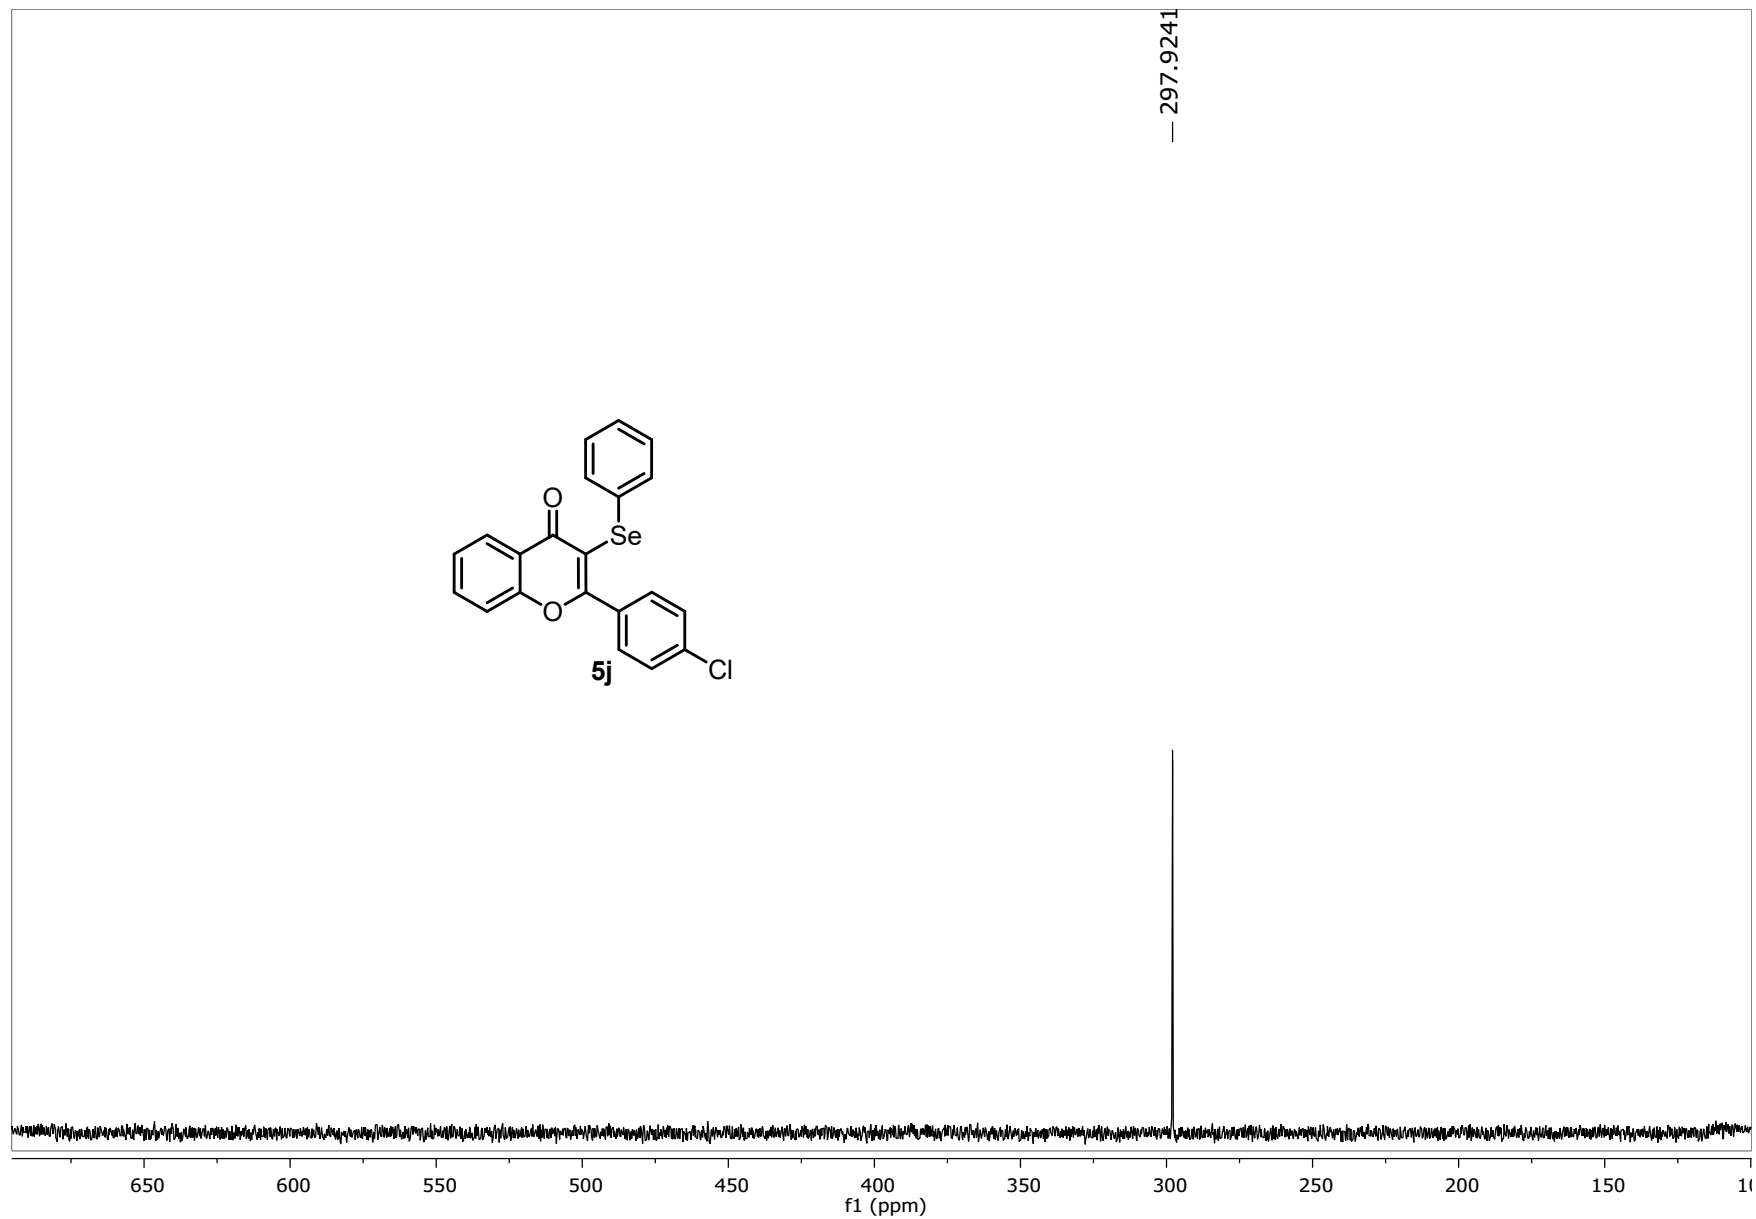

Figure S72:  $^{77}\text{Se}\{^1\text{H}\}$  NMR (76 MHz,  $\text{CDCl}_3$ ) spectrum of compound **5j**.

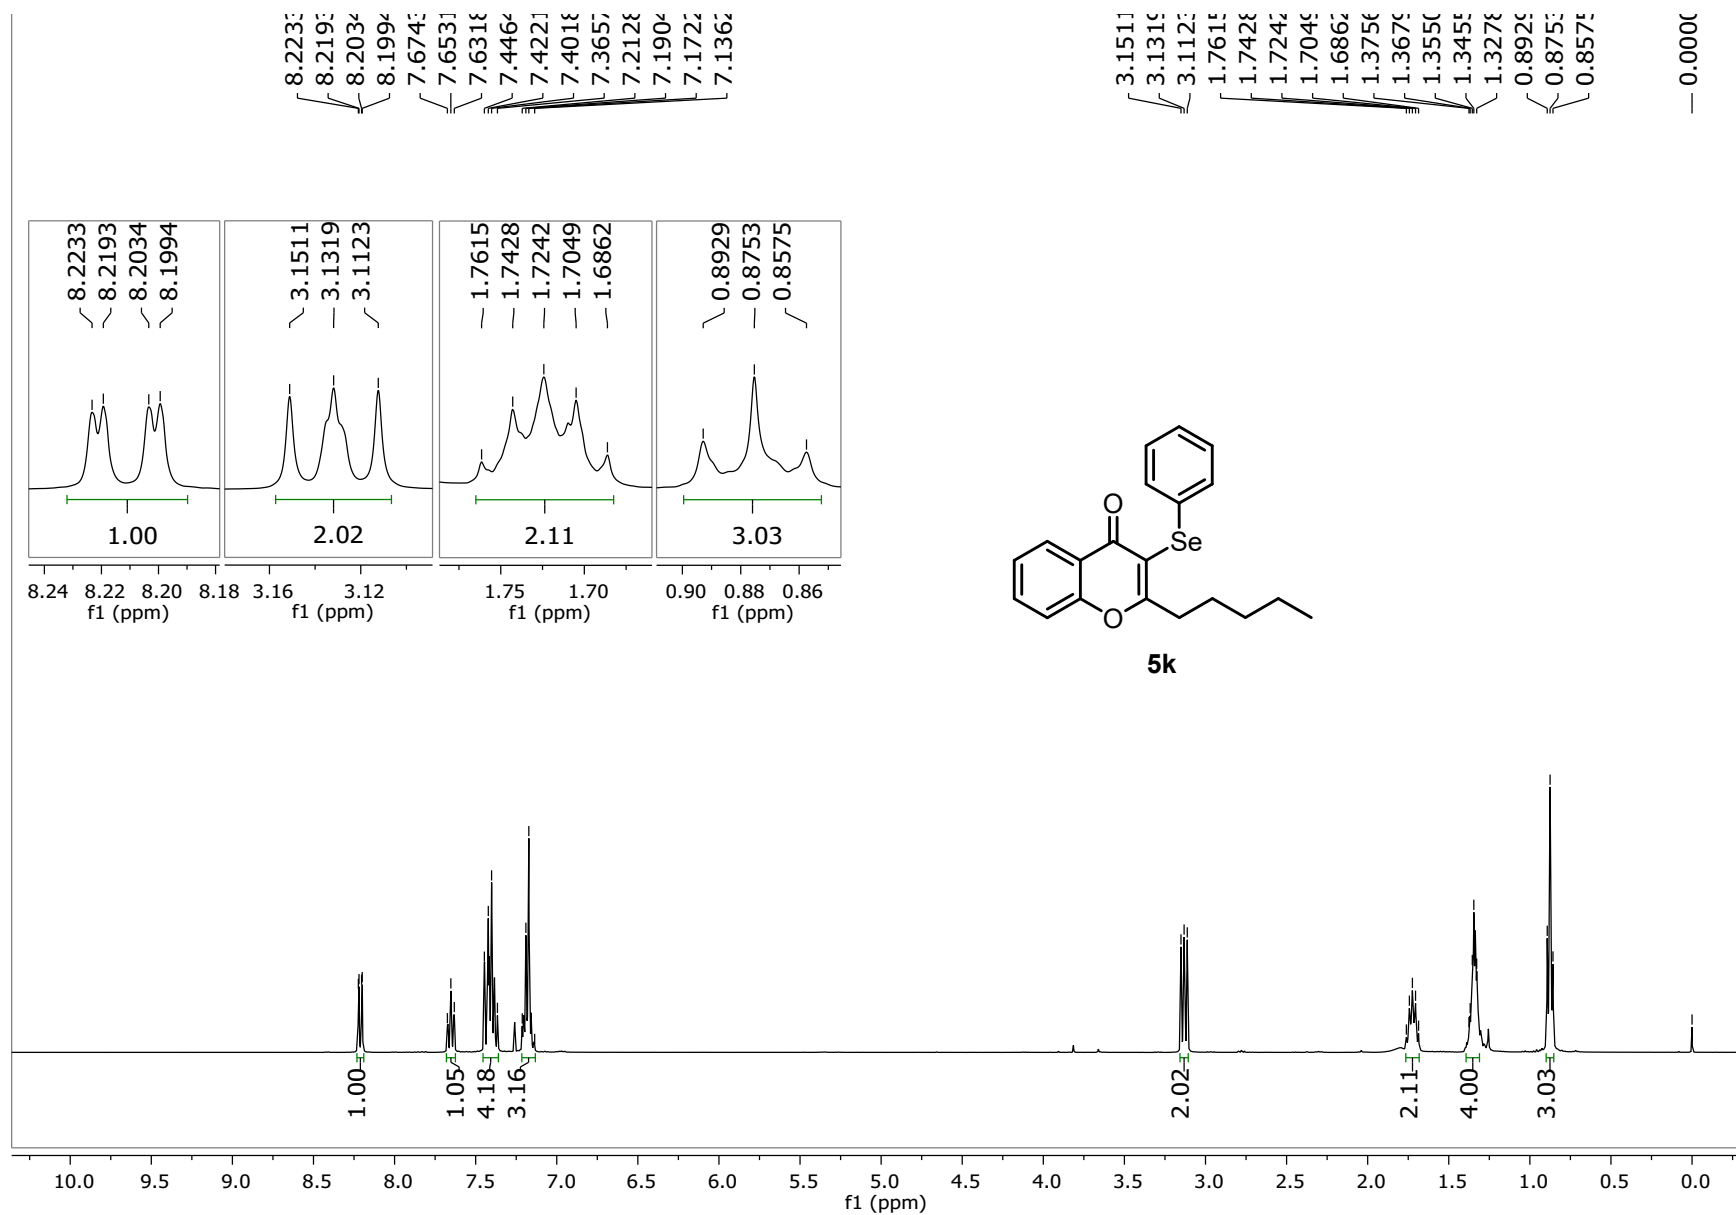

Figure S73:  $^1\text{H}$  NMR (400 MHz,  $\text{CDCl}_3$ ) spectrum of compound **5k**.

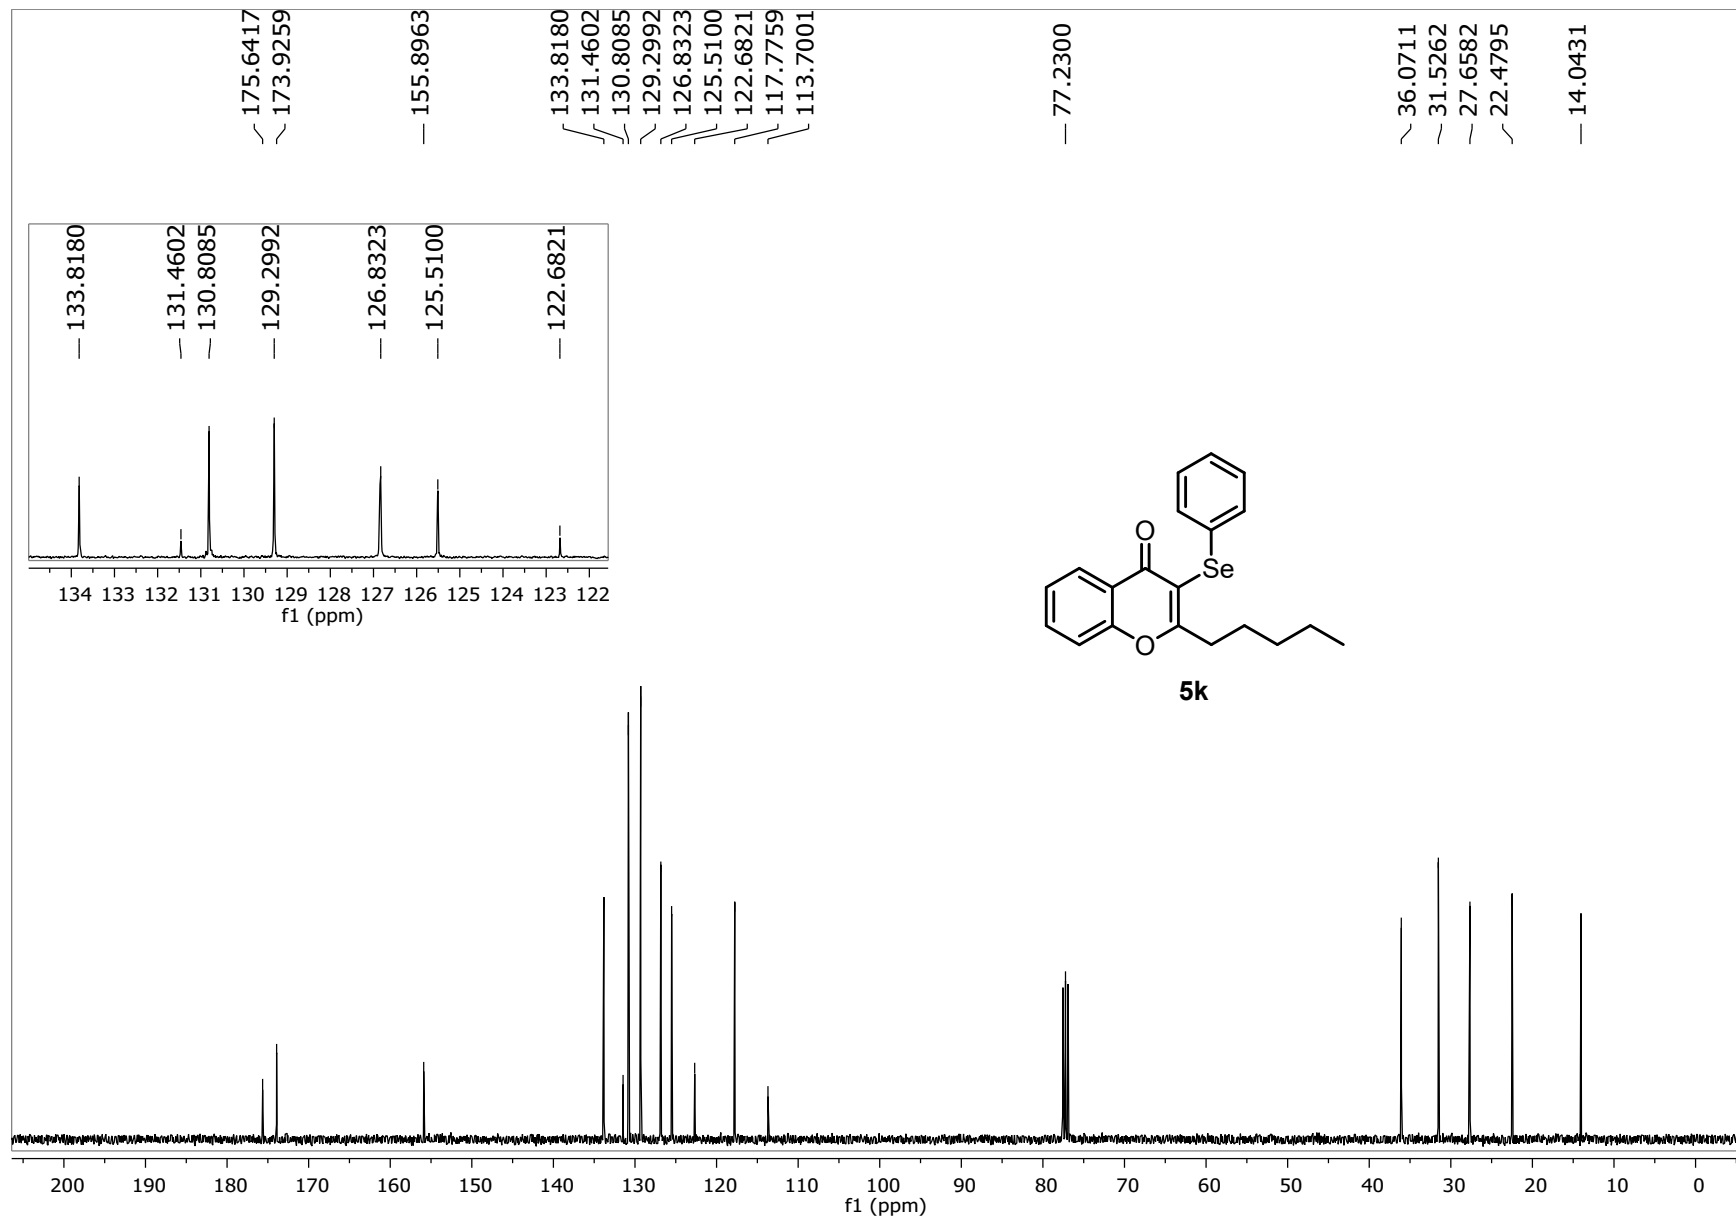

Figure S74: <sup>13</sup>C{<sup>1</sup>H} NMR (100 MHz, CDCl<sub>3</sub>) spectrum of compound **5k**.

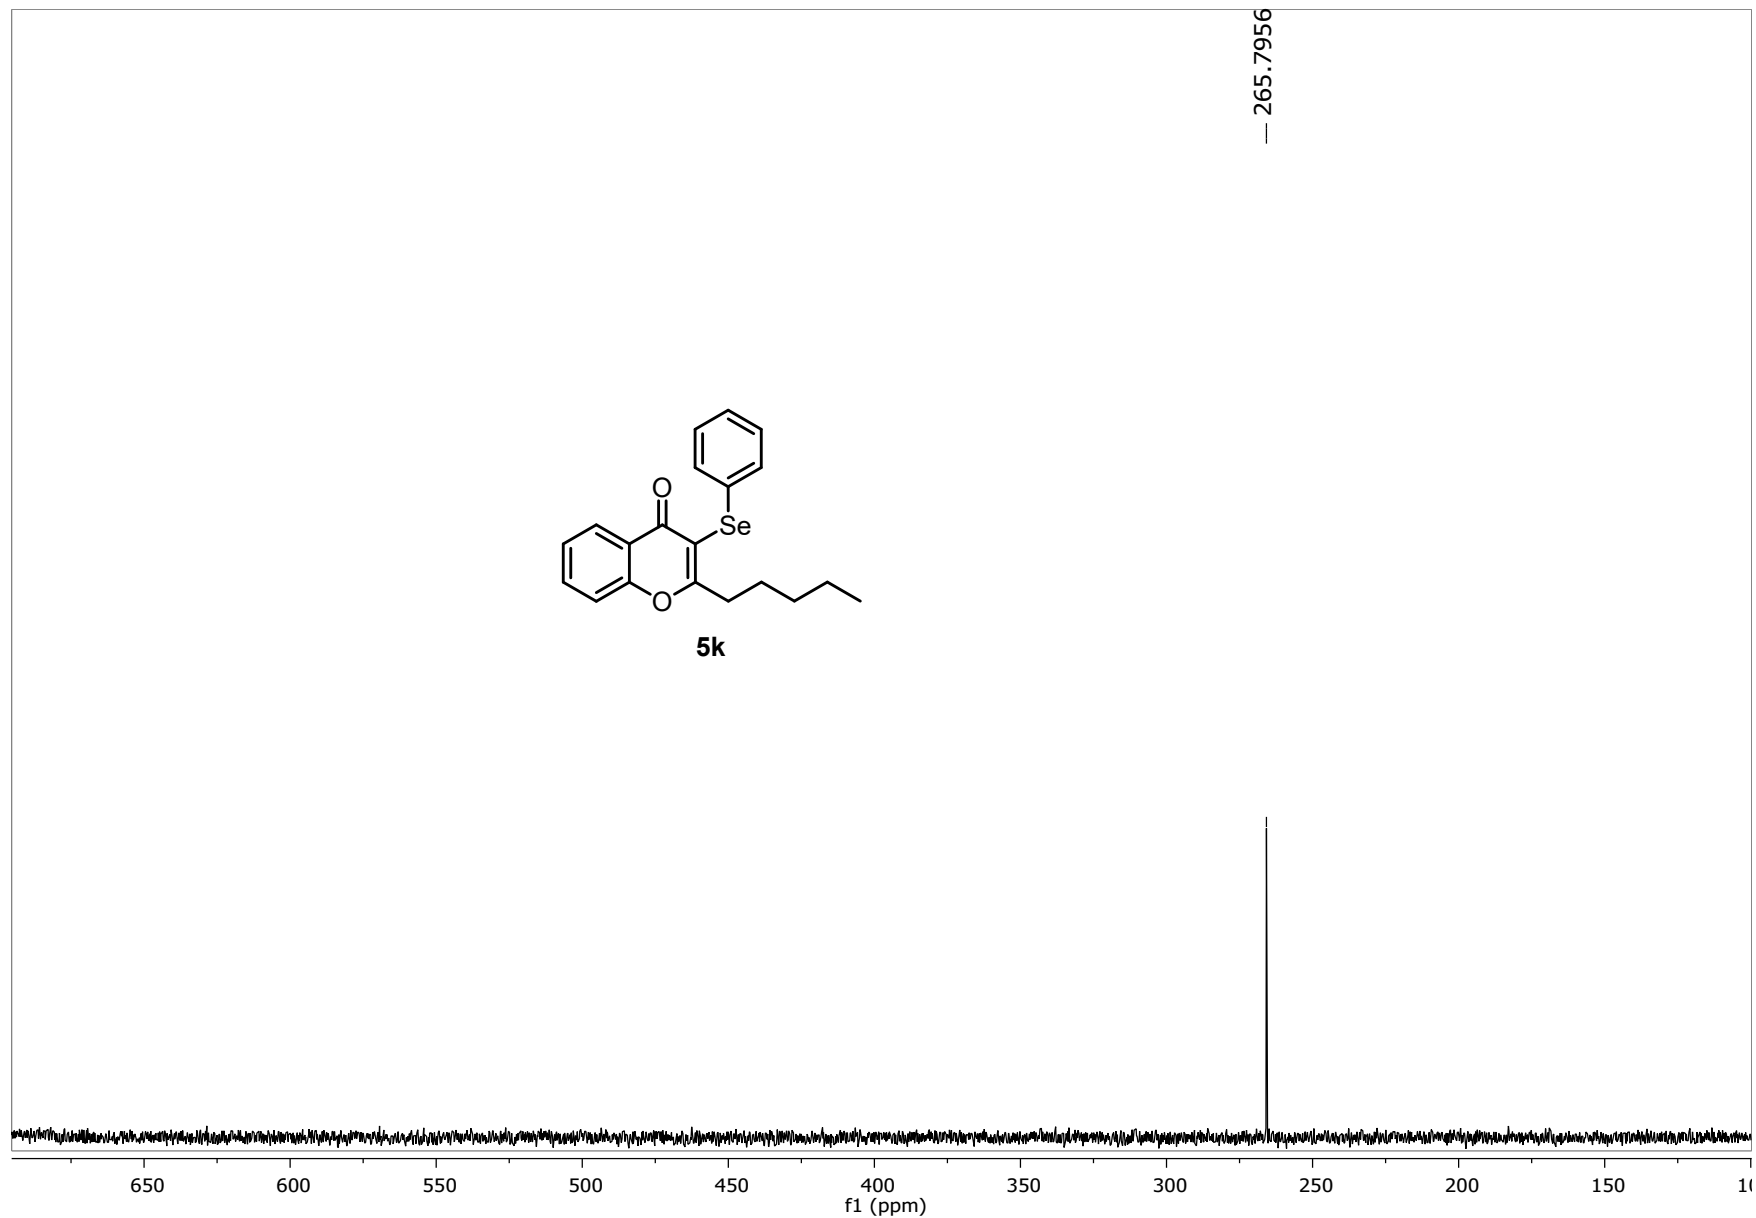

Figure S75:  $^{77}\text{Se}\{^1\text{H}\}$  NMR (76 MHz,  $\text{CDCl}_3$ ) spectrum of compound **5k**.

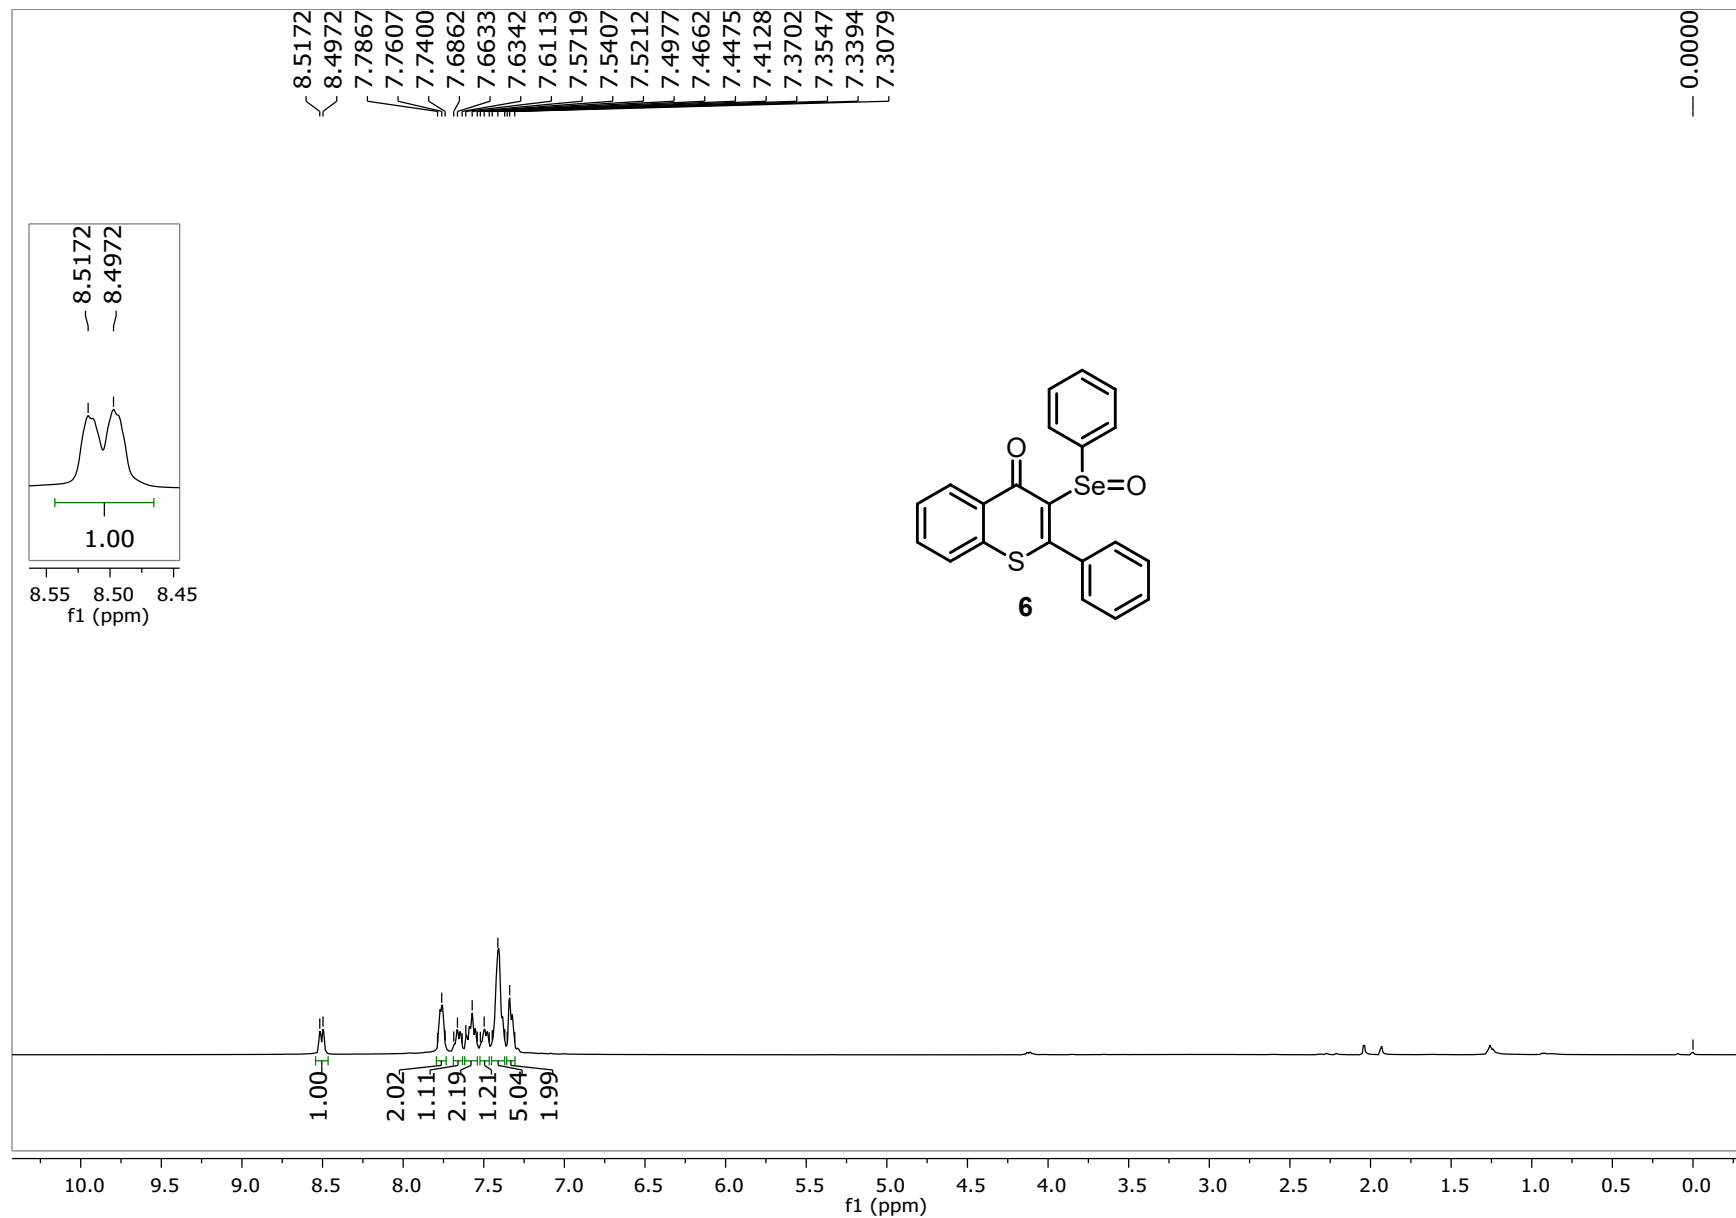

Figure S76: <sup>1</sup>H NMR (400 MHz, CDCl<sub>3</sub>) spectrum of compound **6**.

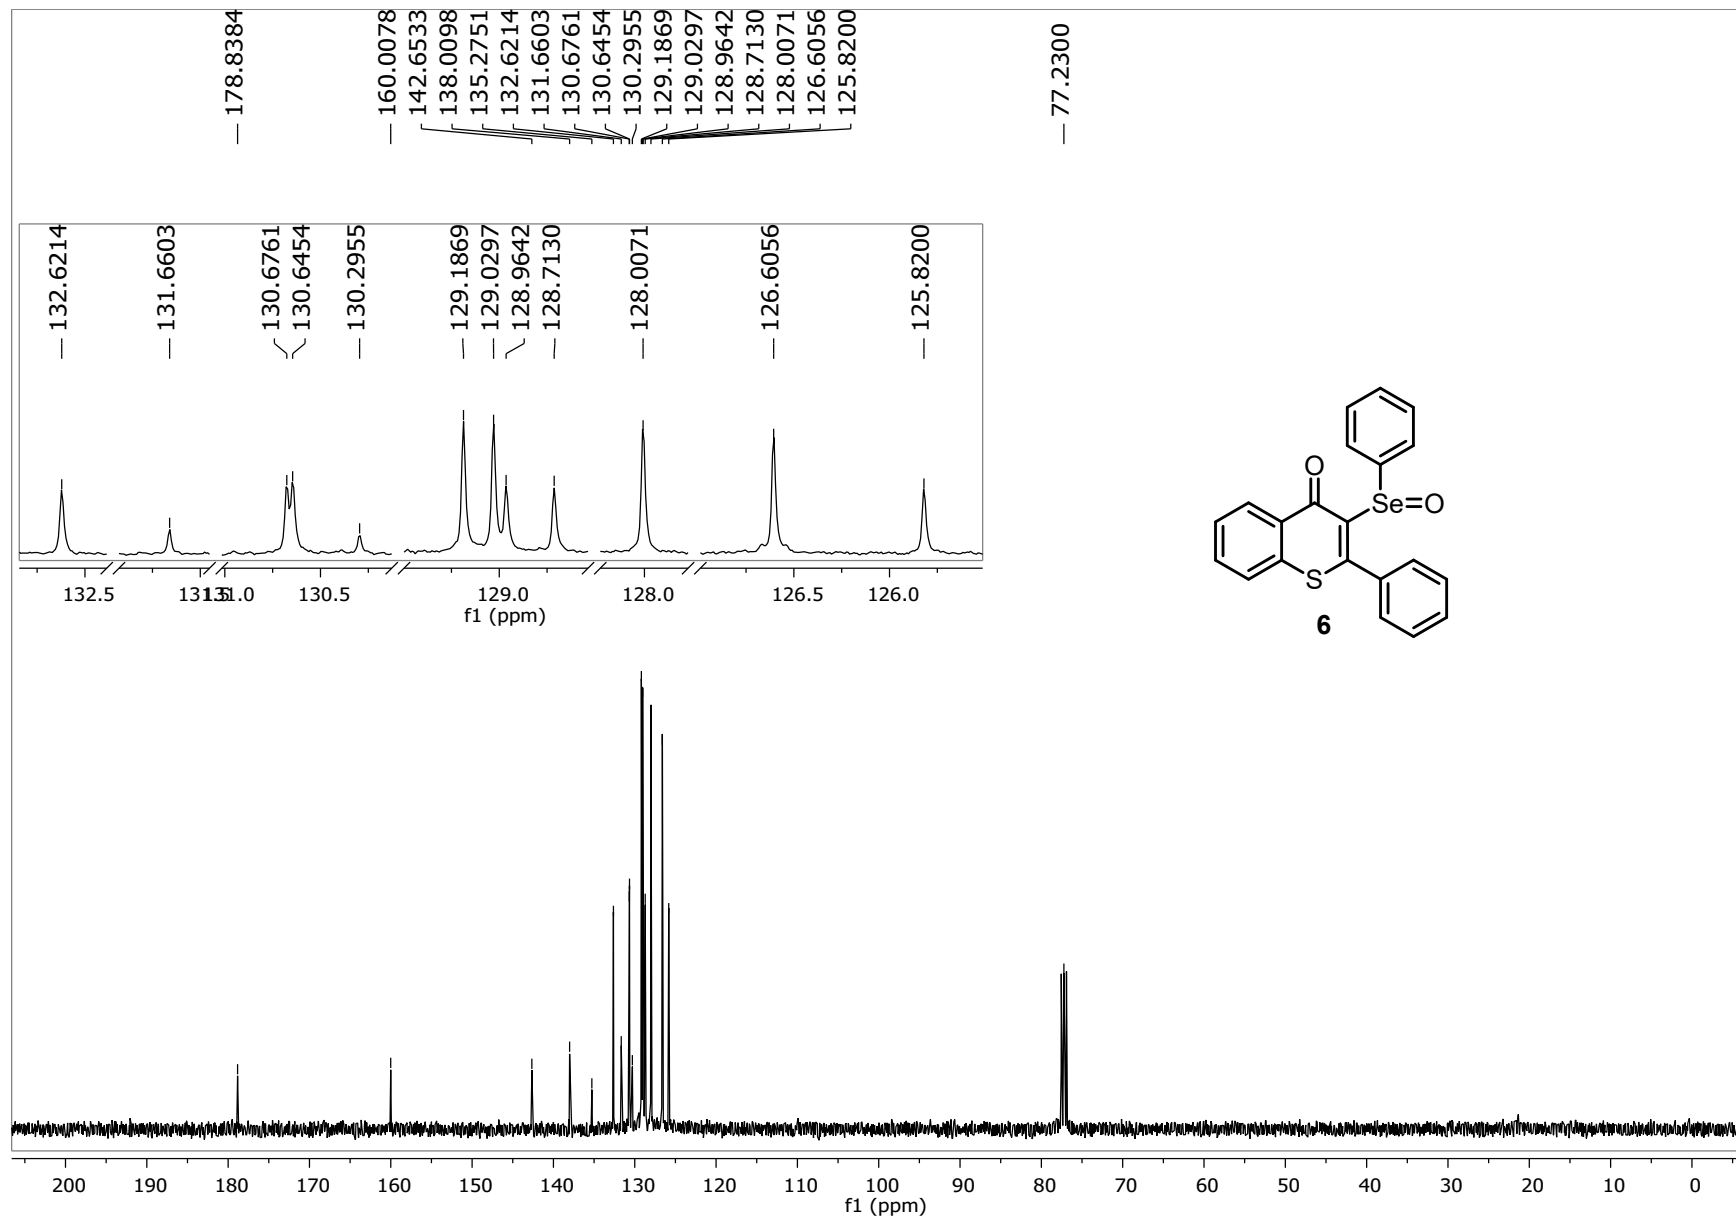

Figure S77:  $^{13}\text{C}\{^1\text{H}\}$  NMR (100 MHz,  $\text{CDCl}_3$ ) spectrum of compound **6**.

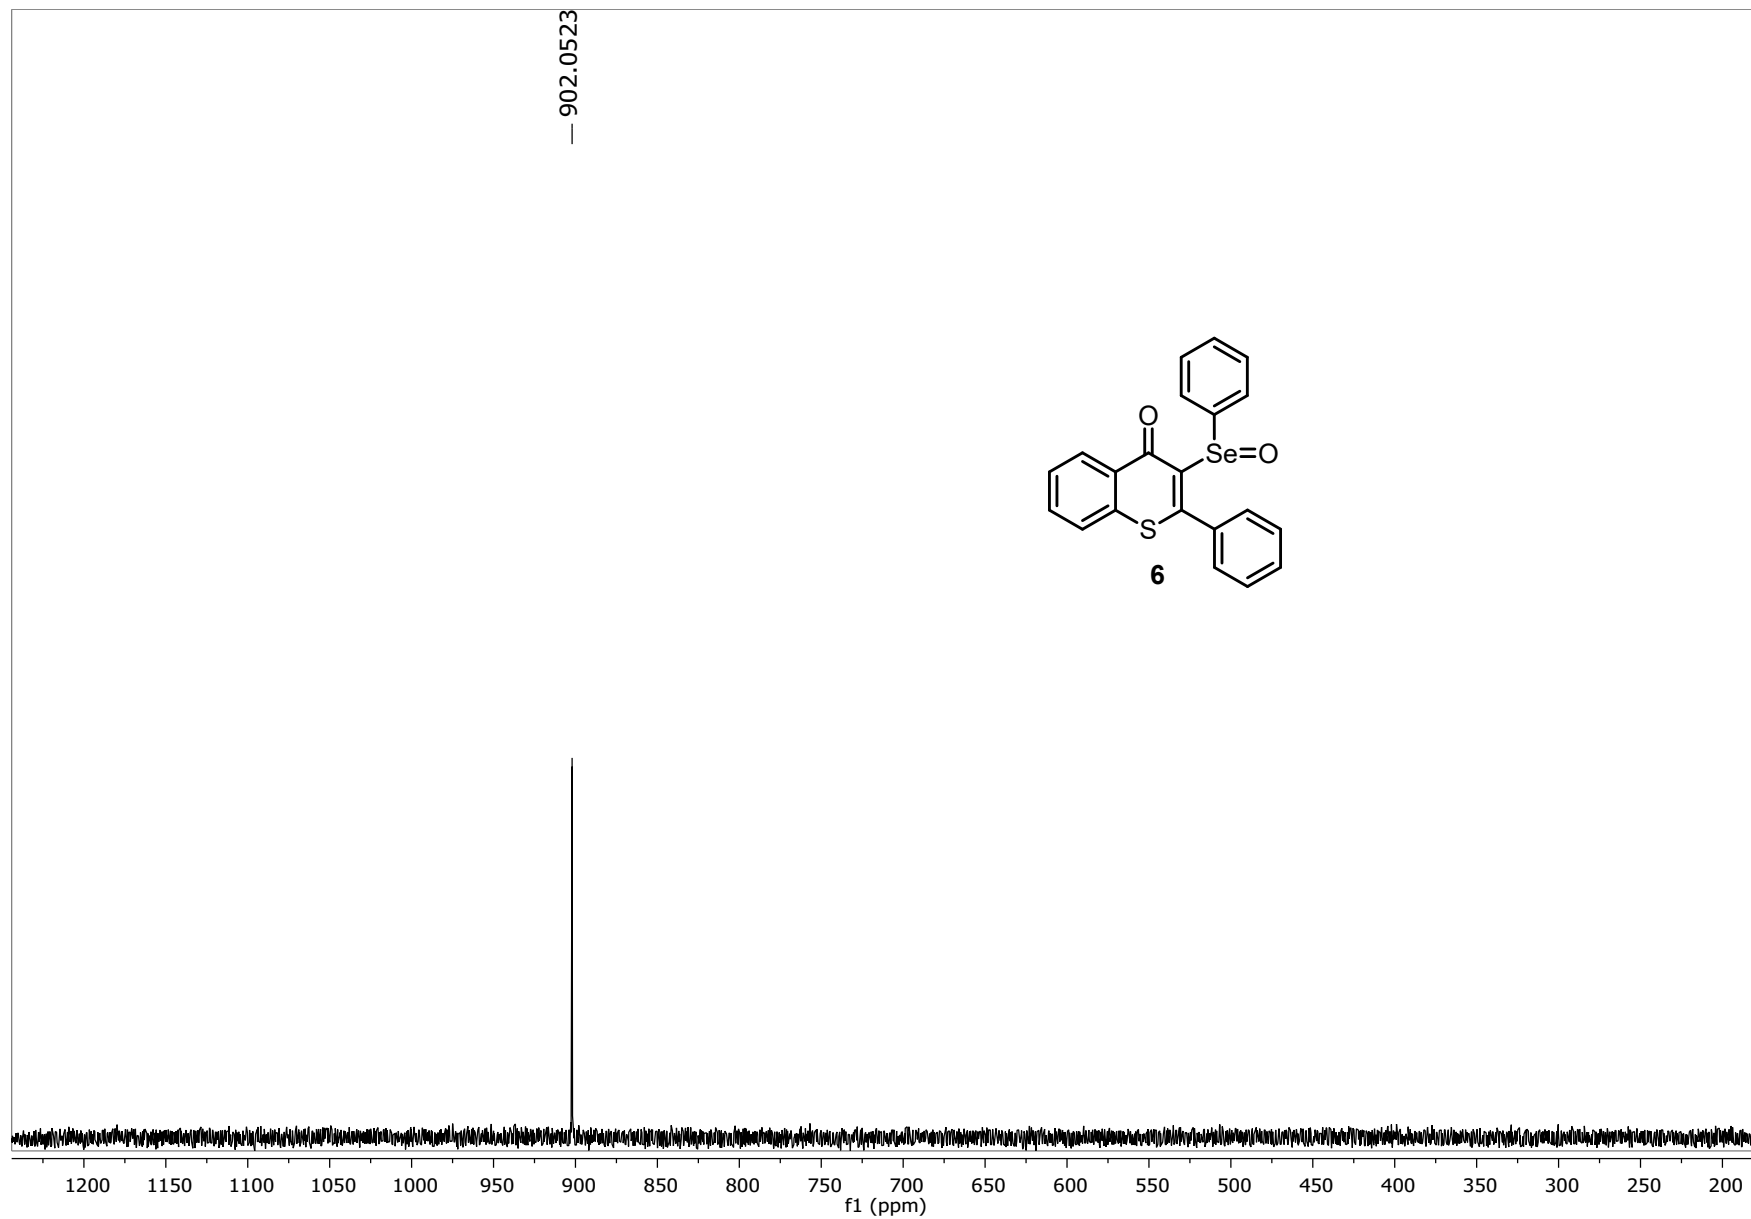

**Figure S78:**  $^{77}\text{Se}\{^1\text{H}\}$  NMR (76 MHz,  $\text{CDCl}_3$ ) spectrum of compound **6**.
